# Supplementary material
Source: publisher figshare collection journal article supplement (https://future-science-group.figshare.com/ndownloader/files/34256363)
Supplement: Supplementary file 1 [file 34256363]

## Sheet: analyses descriptions
	Input threshold	GSE databases	N (Genesets)	N (P<0,05)	N (adjP <0,05)
GSE_DMPs	FDR<0,05	see manuscript, method section	76	71	71
GSE_DMRs	SC<0,05 (DMRcate FDR<0.05)	see manuscript, method section	76	4	0
GSE_DEGs	FDR<0,05	see manuscript, method section	76	10	0
GSE_overlap DMR-DEG	FDR<0,05 & SC<0,05 (DMRcate FDR<0.05)	see manuscript, method section	76	10	0
GSE-eQTM	P<0,05	see manuscript, method section	76	1	0

## Sheet: GSE_DMPs
pathway	pval	padj	log2err	ES	NES	size	Gene_Name
Allen_Brain_Atlas_Developing_Human_Brain_Tissue_Gene_Expression_Profiles_by_RNAseq_amygdaloid_complex	4.27688e-125	3.25043e-123	2.92798	0.486121	2.61642	1912	VPS37B, ARHGAP22, IMPDH1, HRAS, IFFO2, F2RL1, GRM4, SLC9A3R2, COLEC11, HSD11B2, IL34, ERCC1, STAG1, BANP, NR2F1, CAMTA1, AATK, PFKP, AGAP1, CASP6, PITPNM1, RAB11FIP4, KNDC1, CDH4, GAS7, SH2D3C, PIGU, BACE2, ACHE, NXN, PEMT, ANO2, CD247, PGLS, ALDH3A2, KIRREL3, SRSF10, PTPRU, HFM1, AJAP1, USH2A, VSTM2L, BFSP1, AGAP3, PPP2R2C, TAGLN2, KCNK9, VSNL1, AAAS, PRDM11, ABLIM2, EGFR, PARVB, IQCA1, PARD3B, …
Allen_Brain_Atlas_Developing_Human_Brain_Tissue_Gene_Expression_Profiles_by_RNAseq_Mediodorsal_Nucleus_Of_Thalamus	3.65221e-99	1.38784e-97	2.60619	0.468366	2.51605	1729	NR2F1-AS1, HDAC4, FAM83H, SDR16C5, SIPA1L1, GRM4, ZNF423, SH2D4B, TBXAS1, CACNG3, PRKCA, MAPKBP1, SFSWAP, SPEG, C2, HSD11B2, AGAP1, LAMB3, ZFHX3, PACSIN2, SLC37A1, ZBTB7A, SKI, TCF7L2, PIGU, KIAA1614, ACHE, PEMT, ANO2, RBM33, ASIC2, KLHL18, CD247, KCNAB3, GABRD, PTPRC, WDR83, NCOR2, ELMSAN1, CELF1, DHCR7, CBLN2, TAOK1, AMER2, RAPGEF1, FBLN5, RECQL5, COLQ, PCBP3, ANGEL1, WRB, PCDH17, CTNNA2, WSB2,…
Allen_Brain_Atlas_Developing_Human_Brain_Tissue_Gene_Expression_Profiles_by_RNAseq_Cerebellar_Cortex	1.43284e-94	3.62987e-93	2.54183	0.496057	2.65695	1336	TSSC1, FAM181A-AS1, SDR16C5, ZNF423, PTCH1, SFSWAP, SPON1, SPEG, PHLDB2, HSD11B2, ESRRG, CASP6, ZFHX3, KNDC1, ZBTB7A, GAS7, TCF7L2, PIGU, SLC25A45, PEMT, STK32B, RBM33, ASIC2, ALDH3A2, RECK, NCOR2, DHCR7, EBF3, KCNK9, EGFR, MAPK12, RECQL5, COLQ, PCBP3, PITPNM2, CPNE6, PCDH17, LRP2BP, TMCC2, TSNARE1, ANKRD11, PDCD4, ARHGAP27, PLA2G6, PTK7, BCL2L11, MARCH8, SLCO3A1, KCNN3, RPS6KA2, FAM65A, RASA3, D…
Intellectual_Disability_text_mining	6.44792e-86	1.2251e-84	2.42082	0.492024	2.63422	1231	HRAS, HDAC4, ATP10A, ZNF423, KCNJ6, PTCH1, ST14, WWOX, SPON1, NR2F1, CAMTA1, RUNX1, ATP8A2, FGFR3, PCDH9, ACHE, MCF2L, STK32B, ASIC2, VPS13B, SLC2A1, ALDH3A2, KIRREL3, ERCC6, ARID1A, GABRD, TBCD, DHCR7, PPP2R2C, KCNK9, AAAS, TAOK1, TESC, CCDC85C, MPP3, NRXN3, MEF2C, MECOM, PCDH17, CTNNA2, PEX10, INPP5A, ANKRD11, ASTN2, PDE4D, TLE2, KIF26B, ATP2B2, ACOX3, TTC28, AUTS2, NAALADL2, MACROD2, SETBP1, S…
Allen_Brain_Atlas_Developing_Human_Brain_Tissue_Gene_Expression_Profiles_by_RNAseq_Hippocampus_Hippocampal_Formation	5.55339e-76	8.44115e-75	2.2753	0.472878	2.53164	1257	FAM181A-AS1, FAM83H, SFSWAP, SPEG, ATXN1, AGAP1, PLEKHD1, ZFHX3, ZBTB7A, PIGU, KIAA1614, NOTCH4, RBM33, PDIA2, ALDH3A2, KLHL29, NCOR2, SPRED3, DHCR7, TBC1D22A, TRAF1, BCAR3, PRDM11, HIVEP3, EGFR, PARVB, SLC39A13, RECQL5, COLQ, CD36, WRB, RBFOX3, PPP6R1, KTN1, INPP5A, TSNARE1, ANKRD11, ARHGAP27, EXD3, UVSSA, WNT2B, CCND2, ADCY9, NR2F2, CCDC108, RNF220, PRKRA, CTIF, RAI1, HTT, ZC3H12D, KIF13A, PACR…
Allen_Brain_Atlas_Developing_Human_Brain_Tissue_Gene_Expression_Profiles_by_RNAseq_Orbital_Frontal_Cortex	2.30254e-68	2.91655e-67	2.15854	0.465799	2.49144	1189	EXOC4, PTP4A1, PRKCA, PTCH1, EXPH5, PHLDB2, CAMTA1, AGAP1, ZBTB7A, STK32B, HIPK2, PRPSAP1, TMTC1, MSI2, TMCO4, DPYSL2, ATP11A, NCOR2, LSAMP, CBLN2, VSTM2L, TAOK1, PRDM11, TST, KLHDC4, IQCA1, CCDC85C, RECQL5, MEF2C, AES, KIAA1671, WRB, CDC42EP3, PPP6R1, PRRT3, KCNK2, ANKRD11, NKAIN2, DCTN2, BCL2L11, NAALADL2, CSNK2A1, KCNN3, ADCY9, PRKRA, SLC44A5, SMAD3, RPTOR, SYBU, AKAP7, HPSE, ECT2L, LYRM1, NFA…
Allen_Brain_Atlas_Developing_Human_Brain_Tissue_Gene_Expression_Profiles_by_RNAseq_Striatum_24	1.77585e-61	1.92806e-60	2.04524	0.475656	2.53085	993	TSSC1, RGS9, NR2F1-AS1, FAM181A-AS1, F2RL1, GNAL, SH2D4B, SPON1, PHLDB2, EPB41L3, CERS4, EPN3, SLC46A1, ZFHX3, PCDH9, MLLT1, ANO2, DAPK1, CELF1, SEMA4D, KCNK9, BCAR3, RARA, CCDC88C, EGFR, PITPNM2, SRL, PTGFRN, SYNJ2, SSBP3, MYO5B, NTN1, DRD2, IRAK2, CCND2, SNX9, TBC1D4, RASA3, MICAL2, RNF220, PDE10A, SFMBT2, EBF1, COL23A1, ZC3H12D, TBX19, TRPM3, NRN1, PACRG, PRKCDBP, SNX29, BLCAP, KAZALD1, KCNQ1,…
Allen_Brain_Atlas_Developing_Human_Brain_Tissue_Gene_Expression_Profiles_by_RNAseq_Posterior.Caudal_Superior_Temporal_Cortex_Area.22c	6.24867e-53	5.93624e-52	1.89821	0.455009	2.4226	1010	SDR16C5, SIPA1L1, PRKCA, RASSF5, STAB1, CAMTA1, AGAP1, SLC46A1, ZFHX3, DTX1, HIPK2, PGLS, MSI2, DPYSL2, PCOLCE, LSAMP, TAOK1, PRDM11, IQCA1, RECQL5, TANGO6, SNX19, MEF2C, CARD11, KTN1, NKAIN2, AAK1, DLK2, EPB42, NAALADL2, KCNN3, MFSD10, MED27, PRKRA, SLC44A5, SFMBT2, LRGUK, SYBU, AKAP7, TBC1D5, FAM63A, NLRP1, MEGF11, PPP4R1L, PTAR1, ABCG1, STMN1, EFNA3, TRIP12, FOXK1, TNKS2, MORN1, ITGB8, GLRA1, …
Allen_Brain_Atlas_Developing_Human_Brain_Tissue_Gene_Expression_Profiles_by_RNAseq_Dorsolateral_Prefrontal_Cortex	1.35867e-45	1.14732e-44	1.76244	0.454789	2.41327	866	CDH11, EXOC4, PTP4A1, ZMIZ1-AS1, SIPA1L1, PTCH1, ST14, EXPH5, SDK1, STK32B, KLHL18, DPYSL2, NCOR2, CBLN2, SEMA4D, USH2A, VSTM2L, BFSP1, IQCA1, CCDC85C, RECQL5, RUNX1T1, CD36, MEF2C, CARD11, CDC42EP3, TEC, SRL, KCNK2, PDE4D, NKAIN2, DCTN2, GOLGA7B, BCL2L11, EPB42, NAALADL2, DRD2, KCNN3, CD58, TACC2, PRKRA, SLC44A5, SMAD3, SYBU, AKAP7, SGCD, ADAMTS9, MB21D2, PPCDC, ETV6, L3MBTL4, STMN1, RXRA, TNKS2…
Allen_Brain_Atlas_Developing_Human_Brain_Tissue_Gene_Expression_Profiles_by_RNAseq_Inferolateral_Temporal_Cortex_Area.Tev_Area.20	3.97046e-45	3.01755e-44	1.75065	0.471695	2.49146	766	RGS9, EXOC4, PTP4A1, SDR16C5, ST14, AMPD3, SLC46A1, TCF7L2, ADK, MSI2, TMCO4, DPYSL2, MET, RECQL5, RTKN, MEF2C, INPP5A, SRL, CMIP, HSD17B8, NKAIN2, MPZL1, TTC12, CSNK2A1, TENM4, PRKRA, SLC44A5, LRGUK, SYBU, AKAP7, TRIM67, HPSE, AOX1, MEGF11, KCNQ1, EGLN3, DPP7, MAPKAPK3, PPCDC, ADPRHL1, PTAR1, TNKS2, TSPAN9, GLRA1, XYLT2, RAP2A, RASGEF1C, PREX1, CHST15, STK38L, PPP1R14C, DCLK1, BHLHE40-AS1, ATXN1…
Allen_Brain_Atlas_Developing_Human_Brain_Tissue_Gene_Expression_Profiles_by_RNAseq_Ventrolateral_Prefrontal_Cortex	1.83916e-40	1.27069e-39	1.65331	0.45041	2.38433	804	CDH11, EXOC4, PTP4A1, SIPA1L1, PTCH1, EXPH5, SDK1, AGAP1, ZBTB7A, STK32B, HIPK2, KLHL18, PRPSAP1, MSI2, DPYSL2, NCOR2, DHCR7, CBLN2, SEMA4D, VSTM2L, TST, IQCA1, CCDC85C, CD36, MEF2C, CDC42EP3, KCNK2, LRP2BP, NKAIN2, DCTN2, GOLGA7B, TLE3, KCNN3, PRKRA, SLC44A5, RAD51B, SYBU, CUX1, AKAP7, ADAMTS9, PVT1, MB21D2, THSD7B, L3MBTL4, PTAR1, STMN1, RXRA, TNKS2, MORN1, ITGB8, XYLT2, CIB2, CDC16, RASGEF1C, …
Allen_Brain_Atlas_Developing_Human_Brain_Tissue_Gene_Expression_Profiles_by_RNAseq_Primary_Auditory_Cortex.Core	5.78202e-39	3.66195e-38	1.62807	0.451843	2.38623	765	SDR16C5, CDH3, HSD11B2, AMPD3, SLC46A1, ZBTB7A, HIPK2, KLHL18, MSI2, DPYSL2, NCOR2, DHCR7, IQCA1, RECQL5, MEF2C, CARD11, CDC42EP3, KTN1, LRP2BP, NKAIN2, MPZL1, TTC12, MACROD2, PRKRA, SLC44A5, CEP68, SYBU, AKAP7, CDH13, HPSE, MAPKAPK3, RXRA, TNKS2, PC, XYLT2, ARHGAP12, DBF4B, RASGEF1C, GPD2, PREX1, VOPP1, CHST15, PPP1R14C, MALAT1, ADAMTSL5, RTN1, FOXP1, MUC4, LINC00689, JADE1, MYO16, ERVMER34-1, E…
Allen_Brain_Atlas_Developing_Human_Brain_Tissue_Gene_Expression_Profiles_by_RNAseq_Primary_Somatosensory_Cortex_Area.S1_Areas3.1.2	1.18963e-38	6.95475e-38	1.6153	0.4518	2.38381	753	EXOC4, MAPKBP1, CDH3, EXPH5, EPN3, STAB1, SLC46A1, VAC14, TCF7L2, STK32B, HIPK2, KLHL18, MSI2, DPYSL2, DHCR7, USH2A, HIVEP3, IQCA1, RECQL5, SLC7A1, MEF2C, CARD11, CMIP, HSD17B8, NKAIN2, DLGAP4, MPZL1, RTN4RL1, NAALADL2, TLE3, FAM65A, IRS1, SLC44A5, SYBU, AKAP7, ADAMTS9, TRIM67, CDH13, NAV2, LDLRAD4, MEGF11, THSD7B, MAPKAPK3, PTAR1, MMP17, RXRA, TNKS2, GLRA1, XYLT2, RASGEF1C, GJB7, VOPP1, CHST15, …
Allen_Brain_Atlas_Developing_Human_Brain_Tissue_Gene_Expression_Profiles_by_RNAseq_Anterior.Rostral_Cingulate.Medial_Prefrontal_Cortex	4.79118e-38	2.60093e-37	1.60243	0.440929	2.33525	815	CDH11, EXOC4, PTP4A1, GNAL, SLC46A1, ZBTB7A, PCDH9, ADAMTS17, GPRC5C, STK32B, DPYSL2, NCOR2, CBLN2, VSTM2L, TST, IQCA1, CCDC85C, PCBP3, MEF2C, PCDH17, CDC42EP3, SRL, KCNK2, NKAIN2, GOLGA7B, GRASP, WNT2B, KCNN3, PRKRA, SLC44A5, CEP68, SNX29, PPCDC, PNPLA7, STMN1, TNKS2, ARHGAP10, XYLT2, LDB2, CLN6, PREX1, SDK2, PPP1R14C, TRAPPC12, LINC01114, MAPT, HUNK, LHFPL2, LRTOMT, SIPA1L2, TDP1, RTN1, TRIM2, …
Down_Syndrome	1.64422e-35	8.3307e-35	1.54988	0.474107	2.45792	554	KAT2B, KCNJ6, PRKCA, SLC9A3R2, PTCH1, MTRR, ABCC1, FBLN2, RUNX1, ANKS1B, FGFR3, BACE2, ABO, SLC2A1, DPYSL2, RECK, NCOR2, MET, EGFR, AXIN1, MECOM, TP73, PDCD4, CLK3, NFKB1, CSNK2A1, DRD2, FBLN1, GABBR1, CUX1, AKT1, MTHFD1L, PRKCDBP, SMG6, STAT3, DYRK1A, EEF1A1, PARD3, ABCG1, STMN1, PSD3, DPP6, GLRA1, GHR, ELANE, APP, BCL2, KPNA6, TFAP2A, JAK1, LPP, OPRD1, MAPT, HOMER1, GPSM1, SPRY2, ADHFE1, ADAM12…
Down_Syndrome_text_mining	3.86007e-35	1.83353e-34	1.54318	0.499348	2.56935	466	HRAS, PRDM15, IFNAR1, COL18A1, KCNJ6, UMODL1, MTRR, PFKP, RUNX1, VAC14, FGFR3, PBX1, BACE2, ACHE, NRIP1, ITGA2B, PCBP3, CD36, WRB, SPOCK1, CLK3, GCFC2, GABBR1, PDE10A, PARVA, PRMT2, NFATC1, DYRK1A, REPS1, ETV6, PARD3, ABCG1, ZFPM1, PCNT, ETS1, ELANE, XYLT2, APP, DYRK3, EZH2, DNM1, JAK1, DSCAML1, STRBP, MAPT, PAPPA2, LFNG, UNC5A, RTN1, AMPH, ADAM12, ARHGAP25, CTSB, NLGN2, CHODL, INCA1, DSCR4, GSN,…
Allen_Brain_Atlas_Developing_Human_Brain_Tissue_Gene_Expression_Profiles_by_RNAseq_Primary_Motor_Cortex_Area.M1_Area.4	6.13412e-32	2.74231e-31	1.46752	0.452076	2.362	612	EXOC4, COL4A1, PTCH1, STAB1, AGAP1, ZBTB7A, STK32B, HIPK2, KLHL18, PGLS, MSI2, DPYSL2, NCOR2, DHCR7, USH2A, IQCA1, CCDC85C, RECQL5, SLC7A1, CECR7, SRL, TSNARE1, ANKRD11, NKAIN2, MPZL1, CHUK, EPB42, WNT2B, IRAK2, PRKRA, ZC3H12D, AKAP7, THSD7B, PPCDC, ADPRHL1, CMTM2, PNPLA7, RXRA, PCNT, TNKS2, MORN1, SLC47A1, XYLT2, CIB2, DBF4B, RASGEF1C, EME2, SH2D7, ARHGEF10, LRTOMT, RTN1, HTRA3, MYO16, CHST8, ET…
Allen_Brain_Atlas_Developing_Human_Brain_Tissue_Gene_Expression_Profiles_by_RNAseq_Primary_Visual_Cortex_Striate_Cortex_AreaV1.17	2.64369e-31	1.11622e-30	1.45334	0.461179	2.39188	553	WWOX, PLEKHD1, TRAK1, STK32B, CD247, DPYSL2, AJAP1, SPRED3, LSAMP, USH2A, BFSP1, PRDM11, PCDH17, NKAIN2, KIF26B, PTK7, SEMA6C, TENM4, CCND2, MED27, TACC2, OCA2, PTH2R, SLC44A5, AKAP7, EGLN3, PPCDC, ADPRHL1, TNKS2, GLRA1, GHR, KCNA1, STK38L, TRAP1, LINC01114, PTCHD2, ADAMTSL5, CDYL2, TSHZ2, RTN1, CAMKMT, JADE1, PATL1, NOS1, ALK, TSNAXIP1, NET1, DPH1, SLC6A7, LHX2, F7, PDGFRL, ABCB8, KIF6, FCGBP, P…
Neuronal_System	5.79338e-30	2.31735e-29	1.42456	0.56124	2.78925	258	HRAS, PANX1, GNAL, KCNJ6, CACNG3, PRKCA, ACHE, GRIK3, GRIP2, KCNAB3, KCNK9, KCNK2, KCNN3, RPS6KA2, KCNJ1, ADCY9, GABBR1, SLC6A13, KCNQ1, KCNJ4, GNAI2, GRIN2A, GNG12, CPLX1, CACNA1A, KCNA1, KCNK10, CACNA2D2, GABBR2, CACNG2, KCNB1, KCNQ5, RPS6KA1, CACNA1B, KCNAB2, GRIN2D, GLS2, CAMK2B, GNG7, CACNA1E, NCALD, RASGRF2, KCNJ10, KCNC1, ADCY2, KCNS3, PRKCG, CAMKK1, ADCY1, SYN3, GRIN1, ADCY8, CHRNB4, GABR…
Down_Syndrome_Brain	3.55969e-23	1.35268e-22	1.24623	0.435564	2.25214	508	SIX2, NR2F1, RERE, RAB11FIP4, RREB1, ARID1A, AJAP1, TBC1D22A, BCAR3, USP6NL, MPZL1, BCL2L11, TTC28, MTMR7, RPS6KA2, PHC2, MED27, KCNT2, BCAS3, GFPT2, SGCD, AKAP1, PRMT2, DCTD, DYRK1A, REPS1, EP400, ITGB8, OSTM1, GLRA1, KIF23, APP, SGSH, FGD6, CAPZB, TFAP2A, MAPT, TMEM104, AVIL, CDHR2, CTSB, KIAA1456, PKDREJ, N4BP3, FXYD5, VDR, TRIO, FARP1, LPIN1, SLC23A2, GNG7, TOR4A, PLCH1, ZNF710, ALDOB, BACH1,…
Down_Syndrome_CNS_Brain_Cerebellum	1.35376e-20	4.89934e-20	1.17789	0.413705	2.1409	537	IFNAR1, PSMB7, STK24, APBB1IP, RASSF5, KIAA0020, SRSF10, RALY, COQ10A, NUBP1, CLK3, AAK1, WNT2B, SHROOM3, ATP1B1, SREBF1, ITPK1, MYLK, SLC6A13, CPLX2, DYRK1A, GNAI2, ADRBK1, ZFPM1, PAFAH1B1, CANT1, GLRA1, GHR, PTK2B, TH, CCND3, RRAGD, UNC45A, MARK2, SHFM1, PLEKHA7, CUL1, VDR, MAP3K12, SEMA5A, KIF5C, CAPRIN2, GIP, TSC2, SMAD6, ANAPC13, ATF6B, TMED10, ACSL1, DIDO1, SDHB, ANKRD46, SSU72, PLXNB2, DMP…
Alzheimers_Disease_CNS_Brain_Hippocampus	2.52487e-20	8.72227e-20	1.16907	0.411784	2.13091	538	ATP10A, STK24, COL4A1, ZFHX3, PTPRF, TRAK1, GRIP2, KIAA0368, KIAA0232, RECK, MET, ADNP2, MPP3, YIF1A, PDCD4, ZMYM1, TLE2, TTC28, TK2, OSBPL2, TNRC6B, PTPRB, GPLD1, LYRM1, GLRX3, USP48, LEPROTL1, KALRN, SAE1, TRIT1, RB1CC1, ASB1, TRIM44, CTSB, PDGFRB, ZC3H3, SEMA5A, TGFBR3, SLC23A2, RANBP3, GLI3, ITPR3, CAPRIN2, TOX3, ANK1, ARHGEF11, NBAS, MAN2A2, BCKDK, PLXNB2, B4GALT2, RCL1, RABGAP1L, FRY, KLHL3…
HALLMARK_ESTROGEN_RESPONSE_EARLY	4.96462e-20	1.64048e-19	1.16018	0.548778	2.62224	184	SLC37A1, BCL11B, KDM4B, SLC2A1, NRIP1, NCOR2, DHCR7, RARA, SH3BP5, RPS6KA2, ADCY9, ITPK1, SYBU, AKAP1, NAV2, KAZN, ARL3, RHOD, CANT1, LRIG1, BCL2, ELOVL2, MAPT, KRT15, ELF1, FARP1, MYOF, MED13L, SULT2B1, IGF1R, FHL2, GREB1, ADCY1, ABLIM1, SNX24, CELSR1, FAM102A, SLC24A3, TFAP2C, CBFA2T3, AMFR, RHOBTB3, HR, WWC1, SEMA3B, FLNB, OPN3, SLC9A3R1, PGR, TPD52L1, REEP1, ESRP2, TTC39A, RAB31, PODXL, CXCL1…
Down_Syndrome_Fetus	1.08199e-19	3.42629e-19	1.15122	0.412584	2.13549	519	FAM83H, MADD, RECK, SEMA4D, CDCP1, PDGFA, CDK15, HMCN1, AMBRA1, CPNE6, TP73, LRRC42, LAMB1, ADSSL1, GCFC2, CDH6, SCARF2, RTN4RL1, SLCO3A1, MGMT, STARD5, TRPM3, SHF, PAX7, EGLN3, PIP5K1C, ANK3, EEF1A1, KIAA0930, TSPAN18, GLRX3, RAPGEF5, KSR1, TH, F10, FAM198B, ABCG5, PPP1R14C, CASR, TRIM44, DSTYK, ADHFE1, PDE4B, NLGN2, SEC14L1, ALK, TNS4, VDR, USP2, MSH2, LHX2, SLC6A17, SRGAP3, PLCH1, QDPR, PELI2,…
HALLMARK_MYOGENESIS	3.69661e-19	1.12377e-18	1.13309	0.541067	2.57636	180	ENO3, SPEG, ACHE, MAPK12, CD36, MEF2C, ADCY9, MYLK, SGCD, CDH13, NAV2, WWTR1, PC, APP, SORBS1, IGFBP7, ADAM12, CAMK2B, NOS1, CACNA1H, ITGB5, GSN, LPIN1, MYO1C, AKT2, TSC2, MEF2D, ACSL1, LAMA2, DAPK2, PLXNB2, EIF4A2, CHRNB1, SMTN, DMPK, IFRD1, MYBPC3, ABLIM1, SPARC, PTGIS, RYR1, ST5, COX6A2, LSP1, FGF2, GNAO1, ITGA7, GJA5, NCAM1, TPD52L1, REEP1, KIFC3, PDE4DIP, MYOM1, NOTCH1, COL15A1, PFKM, TCAP, …
HALLMARK_ESTROGEN_RESPONSE_LATE	5.35817e-17	1.56624e-16	1.06721	0.519951	2.47877	181	ST14, FGFR3, ALDH3A2, NRIP1, NCOR2, DHCR7, TST, PDCD4, RPS6KA2, SERPINA5, ITPK1, LAMC2, ARL3, BCL2, TH, CACNA2D2, JAK1, MAPT, TRIM29, MEST, CHST8, FARP1, MYOF, SULT2B1, MAPK13, SNX10, FAM102A, SLC24A3, TFAP2C, HOMER2, AMFR, HR, NAB2, XRCC3, SEMA3B, FLNB, OPN3, DNAJC12, ASS1, SLC9A3R1, PGR, TPD52L1, RAB31, SLC29A1, CXCL12, OVOL2, OLFM1, DCXR, LLGL2, TIAM1, FRK, CD9, RAPGEFL1, ATP2B4, SLC7A5, SCNN1…
HALLMARK_UV_RESPONSE_DN	3.22308e-16	9.07237e-16	1.0377	0.570282	2.62634	132	SIPA1L1, PRKCA, ABCC1, ATXN1, PRKCE, RUNX1, MET, FBLN5, VAV2, SLC7A1, ZMIZ1, SYNJ2, NFKB1, MGMT, IRS1, MT1E, SMAD3, FYN, DYRK1A, RXRA, ATP2C1, CACNA1A, LTBP1, PRDM2, F3, KALRN, NR3C1, PTPRM, MAP2K5, AMPH, PDGFRB, TGFBR3, SDC2, APBB2, IGF1R, RND3, FHL2, LAMC1, WDR37, SYNE1, MGLL, DLG1, CDON, CELF2, PLCB4, ANXA2, TGFBR2, GRK5, KCNMA1, LPAR1, MAP1B, ADORA2B, ERBB2, ATP2B1, ATP2B4, CDC42BPA, NFIB, AN…
Intellectual_Disability	2.112e-15	5.73257e-15	1.00732	0.535013	2.50372	151	HDAC4, CAMTA1, ATP8A2, ALDH3A2, KIRREL3, ERCC6, ARID1A, KCNK9, EML1, MEF2C, ANKRD11, DNMT3A, PTDSS1, DYRK1A, ANK3, FGFR2, AHDC1, SMARCB1, CACNG2, CDK5RAP2, TRAPPC9, PNKP, EHMT1, FOXP1, DOCK8, KCNJ10, CEP135, CDH15, GRIN1, KCNQ2, PIGL, CRADD, TCF4, SMARCA2, NSUN2, WDPCP, UBE3B, MBD5, PACS1, MKKS, ZBTB16, ZNF335, CCBE1, KIF1A, CTCF, GRIK2, RAB3GAP2, BBS2, HPD, TTC21B, ARID1B, GRIN2B, SATB2, ASPM, Z…
HALLMARK_APICAL_JUNCTION	1.05793e-14	2.77251e-14	0.986546	0.510497	2.42973	179	HRAS, CDH11, EXOC4, ATP1A3, CDH3, SPEG, LAMB3, CDH4, PTPRC, TRAF1, PPP2R2C, EGFR, VAV2, CDH6, MPZL1, IRS1, PARVA, LAMC2, GNAI2, NFASC, SIRPA, BAIAP2, NLGN2, STX4, SDC3, AKT2, LAMA3, FLNC, ACTN4, MAPK13, ACTN1, SGCE, CDH15, ICAM2, CLDN11, CTNNA1, GRB7, CLDN4, TSPAN4, SLC30A3, DLG1, PIK3CB, SRC, DHX16, VCAM1, ITGA9, VWF, EVL, ITGA2, LDLRAP1, CLDN14, MMP2, LIMA1, SHC1, CERCAM, COL17A1, PDZD3, COL9A1…
HALLMARK_EPITHELIAL_MESENCHYMAL_TRANSITION	2.38292e-14	6.03673e-14	0.975995	0.505403	2.39145	171	CDH11, COL4A1, FBLN2, PCOLCE, FBLN5, SPOCK1, CDH6, FBLN1, MYLK, SGCD, LAMC2, TPM1, CD59, NTM, MEST, ADAM12, PDGFRB, ITGB5, TGFBR3, LAMA3, EFEMP2, PCOLCE2, ELN, LAMA2, PRRX1, COL12A1, LRP1, CALD1, TNFRSF12A, SLIT3, SFRP1, SPARC, LAMA1, ANPEP, SERPINE2, LAMC1, FSTL1, DST, COL5A1, FAP, FGF2, IGFBP2, CAPG, IL15, COMP, LOXL2, SNTB1, VCAM1, CXCL12, HTRA1, ITGA2, SGCB, DPYSL3, MMP2, COL8A2, COL4A2, FN1,…
HALLMARK_MITOTIC_SPINDLE	5.88097e-13	1.44179e-12	0.921426	0.485209	2.31609	183	RASAL2, TBCD, ABR, ARHGAP27, BCL2L11, CLASP1, STAU1, ARHGEF2, BRCA2, RAPGEF5, PCNT, PAFAH1B1, KATNB1, ARHGAP10, FGD6, CAPZB, SORBS2, PREX1, STK38L, CDK5RAP2, BCAR1, TRIO, NET1, GSN, DOCK4, FARP1, MARK4, NEK2, EPB41, ACTN4, ARHGEF11, CLIP2, SYNPO, AURKA, DST, MAP3K11, CLIP1, FGD4, FLNB, PALLD, NCK2, NUMA1, DLG1, ROCK1, SPTBN1, ARHGEF3, CDC42EP1, BCR, ARFGEF1, AKAP13, MYO1E, PXN, LMNB1, TIAM1, ARHG…
HALLMARK_IL2_STAT5_SIGNALING	9.75432e-13	2.31665e-12	0.91012	0.486495	2.31386	177	ENO3, PTCH1, CKAP4, HIPK2, CDCP1, TRAF1, CCND2, SNX9, IL2RB, PLEC, RORA, LRIG1, BCL2, CYFIP1, CCND3, RRAGD, SELP, DCPS, MAP3K8, MYO1C, AGER, IGF1R, HK2, LCLAT1, POU2F1, RABGAP1L, BCL2L1, TNFRSF1B, DRC1, NCOA3, LTB, NFKBIZ, SERPINB6, MAPKAPK2, COL6A1, SOCS2, CAPG, ADAM19, GSTO1, MYO1E, TIAM1, CTLA4, TNFRSF8, PTGER2, PRKCH, ST3GAL4, ITGAE, FURIN, IL10, SH3BGRL2, GBP4, RGS16, CD81, AHNAK, ANXA4, ITG…
HALLMARK_KRAS_SIGNALING_DN	1.24323e-12	2.86321e-12	0.91012	0.49303	2.32549	168	PDCD1, HSD11B2, FGFR3, GPRC5C, MAST3, DLK2, CDKAL1, ARPP21, LFNG, KRT15, NOS1, MYO15A, MX1, SPTBN2, YBX2, KMT2D, SPHK2, SYNPO, GRID2, KCNQ2, P2RX6, EPHA5, FGGY, RYR1, CAMK1D, SCN10A, EGF, IGFBP2, C5, ZBTB16, NTF3, PTPRJ, MTHFR, YPEL1, SLC30A3, PAX4, TG, THRB, ABCG4, ARHGDIG, SLC6A3, IDUA, ITIH3, CALCB, DCC, COL2A1, TCF7L1, CPEB3, KCNN1, PNMT, UPK3B, KRT13, RSAD2, TGFB2, SGK1, LYPD3, PDE6B, RYR2, …
HALLMARK_COMPLEMENT	1.37317e-11	3.06945e-11	0.875325	0.458556	2.1929	187	APOC1, C2, NOTCH4, CD36, CTSC, CDH13, FYN, GNAI2, L3MBTL4, CD59, CTSH, CPM, F3, GPD2, F10, LIPA, CTSB, STX4, DOCK4, KCNIP3, F7, RNF4, DPP4, HPCAL4, EHD1, LRP1, PREP, DGKG, SH2B3, PIK3R5, CFB, DOCK9, PIK3CG, FCN1, AKAP10, DOCK10, IRF2, PDGFB, PLA2G4A, PSMB9, SRC, PRCP, C1QC, DGKH, IRF7, GNGT2, CLU, CASP7, CP, GNG2, COL4A2, SPOCK2, FN1, SERPINA1, DUSP5, HSPA1A, VCPIP1, CASP1, CBLB, GRB2, PFN1, PDP1…
HALLMARK_HYPOXIA	3.24938e-11	7.05581e-11	0.851339	0.475714	2.25659	172	ENO3, RBPJ, PAM, PRKCA, PFKP, CASP6, AMPD3, SLC2A1, EGFR, MT1E, EFNA3, ACKR3, RORA, SLC6A6, ETS1, BCL2, F3, TPD52, NR3C1, RRAGD, NCAN, WSB1, GCK, SDC3, IRS2, ALDOA, SDC2, SULT2B1, ALDOB, HK2, SLC2A5, EFNA1, IER3, EXT1, COL5A1, DPYSL4, AKAP12, CHST3, NEDD4L, GYS1, PDGFB, ERRFI1, PCK1, GCNT2, HK1, PPFIA4, ANXA2, KLF7, PFKL, FOXO3, HS3ST1, ADORA2B, AK4, CP, SCARB1, PPARGC1A, JMJD6, TES, ANGPTL4, NDS…
HALLMARK_APOPTOSIS	2.57285e-10	5.43157e-10	0.814036	0.481382	2.24629	145	CASP6, MADD, RARA, PDCD4, BCL2L11, MGMT, CCND2, APP, PDGFRB, GSN, TGFBR3, AIFM3, TNFRSF12A, WEE1, BCL2L1, LMNA, IER3, PLCB2, BMF, ROCK1, ANKH, DPYD, CD14, ERBB2, CLU, MMP2, CREBBP, RNASEL, TNF, CASP7, BCL2L2, CD2, TGFB2, GUCY2D, CASP1, ISG20, IGFBP6, GSR, PTK2, SC5D, IRF1, CASP4, IGF2R, FEZ1, SPTAN1, CDC25B, CCND1, TSPO, ADD1, KRT18, HGF, IFITM3, CD44, SLC20A1, BTG3, CASP8, PRF1, BNIP3L, F2, BIK,…
Allen_Brain_Atlas_Developing_Human_Brain_Tissue_Gene_Expression_Profiles_by_RNAseq_CTD.Gene_Disease.Associations_ID	2.93458e-10	6.02779e-10	0.814036	0.509815	2.31142	115	HDAC4, COL18A1, ADK, SLC2A1, MEF2C, DNMT3A, SETBP1, PRKRA, RAI1, COQ5, GON4L, FGFR2, CACNA1G, TH, SHANK2, DOCK8, KANSL1, SRGAP3, MED13L, MCC, RALGDS, KDM6B, FRY, PRKCG, ZBTB40, LAMA1, UROC1, SLC4A10, CAPN10, RGS7, SHANK3, PDHX, CCBE1, TSEN54, VRK1, ALDH5A1, SCAPER, GNAS, NRXN1, GRIN2B, TRMT1, KCNA2, NDST1, DEAF1, TMCO1, STRA6, DISC1, SYNGAP1, LARP7, SC5D, PAX6, VIP, TMEM135, TSEN34, NF1, CIC, YY1…
HALLMARK_KRAS_SIGNALING_UP	5.50822e-10	1.10164e-09	0.801216	0.456436	2.15725	170	F2RL1, SPON1, EPB41L3, TRAF1, CCND2, GFPT2, PDCD1LG2, ETS1, GYPC, MALL, SPRY2, EPHB2, AKT2, KIF5C, LCP1, PRRX1, MTMR10, RABGAP1L, WDR33, MAP7, ETV1, IKZF1, TNFRSF1B, TMEM100, MMP11, RELN, CFB, SDCCAG8, AKAP12, SEMA3B, ATG10, HDAC9, ALDH1A2, ST6GAL1, FLT4, LAT2, ANKH, CAB39L, ITGA2, ITGBL1, IGF2, ITGB2, WNT7A, CBX8, MYCN, USH1C, HKDC1, JUP, RGS16, HBEGF, FBXO4, PLVAP, ANGPTL4, ETV5, KCNN4, PIGR, A…
HALLMARK_HEME_METABOLISM	1.46601e-09	2.85684e-09	0.788187	0.450417	2.14007	174	KAT2B, CAST, SLC2A1, TMCC2, MARCH8, EPB42, TNRC6B, PC, NR3C1, CCND3, GYPC, CLCN3, KLF3, CTSB, TNS1, SEC14L1, DMTN, SPTB, ANK1, EPB41, BACH1, RCL1, BCAM, SLC30A10, RAP1GAP, MARCH2, RANBP10, DAAM1, KDM7A, YPEL5, ADD2, CTSE, MFHAS1, UCP2, VEZF1, FOXO3, PQLC1, SNCA, SLC22A4, XPO7, SLC6A9, HAGH, SMOX, ARHGEF12, ATP6V0A1, DCAF11, CTNS, ACSL6, BLVRA, KEL, MAP2K3, LPIN2, RNF123, MXI1, IGSF3, BLVRB, HTRA2…
HALLMARK_INFLAMMATORY_RESPONSE	1.9628e-09	3.72931e-09	0.774939	0.443386	2.10752	175	IFNAR1, STAB1, SEMA4D, MET, SLC7A1, NFKB1, IRAK2, GABBR1, IL2RB, NOD2, BEST1, ATP2C1, ITGB8, CD82, F3, PDE4B, PCDH7, RNF144B, FZD5, SLC1A2, HPN, TNFRSF1B, ABCA1, PIK3R5, TACR1, IL15, C5AR1, SLC4A4, TLR3, LY6E, PTGER4, IRF7, CD14, LPAR1, PDPN, ADORA2B, PTGER2, PTPRE, ATP2B1, IL10, SLC7A2, RGS16, HBEGF, TLR1, SPHK1, OSMR, BST2, SCN1B, CCL17, IRF1, CCRL2, IFNGR2, VIP, TPBG, TAPBP, CD70, MSR1, TACR3,…
HALLMARK_ADIPOGENESIS	5.37845e-09	9.9698e-09	0.761461	0.444032	2.10641	173	COL4A1, ADIPOR2, PEMT, RREB1, DHCR7, TST, CD36, PDCD4, CHUK, MYLK, COQ5, GPD2, SORBS1, ABCB8, QDPR, ALDOA, SLC25A10, SDHB, SCP2, TANK, ABCA1, LPL, AGPAT3, AK2, ITGA7, REEP6, CMBL, DRAM2, MGLL, APLP2, POR, ENPP2, COL15A1, UCP2, PFKL, PHYH, ACOX1, BCL6, STAT5A, TKT, DNAJC15, SCARB1, GPHN, PQLC3, HIBCH, LIFR, CS, PHLDB1, PTGER3, BAZ2A, ANGPTL4, CRAT, PFKFB3, SLC19A1, SLC1A5, SSPN, COQ9, NDUFA5, ECHS…
Abnormality_Of_Neuronal_Migration	1.99323e-08	3.6068e-08	0.733762	0.449583	2.09802	146	IMPDH1, COL18A1, ZNF423, COL4A1, ERCC1, FGFR3, BMPER, DHCR7, LARGE, PEX10, ANKRD11, CCND2, AIPL1, PAFAH1B1, GLI2, PDGFRB, FKRP, KIF5C, KAT6B, GDF6, LAMA2, HSD17B4, RELN, SLC20A2, RTTN, RMND1, CCBE1, PDGFB, LRAT, TULP1, HYLS1, RAB3GAP2, DHCR24, IBA57, FTO, PEX26, NDE1, ASPM, RECQL4, VTI1A, GUCY2D, RPGRIP1, AKT3, FIG4, ARL13B, ASXL1, HIC1, FKTN, DCHS1, KIAA0196, PHGDH, CRB1, NEK1, CEP41, PEX14, POM…
HALLMARK_GLYCOLYSIS	4.36198e-08	7.70955e-08	0.719513	0.430562	2.04241	172	PAM, PFKP, CASP6, MET, EGFR, EGLN3, STMN1, EFNA3, PC, XYLT2, CLN6, RRAGD, HOMER1, SLC16A3, SDC3, CACNA1H, IRS2, ALDOA, SDC2, SLC25A13, SLC25A10, ALG1, ALDOB, HK2, B4GALT2, LCT, FUT8, LHPP, CAPN5, AURKA, IER3, COG2, EXT1, COL5A1, DPYSL4, TGFA, PKP2, GALK2, GYS1, GLCE, PPFIA4, IDUA, SPAG4, ADORA2B, LHX9, AK4, GALE, B3GAT1, ANGPTL4, HDLBP, ISG20, PLOD2, CHST1, PLOD1, PYGL, MXI1, GAL3ST1, STC2, TSTA3…
HALLMARK_PI3K_AKT_MTOR_SIGNALING	4.72244e-08	8.15694e-08	0.719513	0.497108	2.19405	96	HRAS, SLC2A1, EGFR, RPTOR, AKT1, PITX2, RPS6KA1, PPP2R1B, GSK3B, TSC2, ACACA, ADCY2, MAPKAP1, MAPK8, PPP1CA, PRKCB, MAPK1, ITPR2, CAMK4, E2F1, PIN1, VAV3, MKNK2, CAB39L, TIAM1, TNFRSF1A, TRAF2, RIPK1, SFN, PLCB1, FGF17, GRB2, PFN1, UBE2N, ECSIT, MAP2K3, PAK4, CAB39, PIK3R3, GNGT1, NFKBIB, RAC1, CLTC, GNA14, TBK1, PTPN11, SQSTM1, MAPK10, ARHGDIA, PLCG1, CXCR4, LCK, MAPK9, PDK1, RAF1, PTEN, CDKN1A,…
HALLMARK_ALLOGRAFT_REJECTION	6.10309e-08	1.03074e-07	0.704976	0.427819	2.0295	173	C2, STAB1, ACHE, CD247, PTPRC, STAT1, EGFR, IL16, CCND2, AKT1, CCR2, IL2RB, SPI1, ETS1, ELANE, DYRK3, TPD52, CCND3, CD96, EIF3J, FGR, ITK, PRKCG, NCF4, PRKCB, LTB, CD47, PF4, CAPG, IL15, HDAC9, LY86, TLR3, IL12RB1, BCAT1, HLA-DMA, IRF7, TRAF2, RPL3L, NOS2, TNF, ITGB2, IL10, CD2, TGFB2, TLR1, CRTAM, CD1D, UBE2N, ZAP70, CD8B, CTSS, EIF4G3, WARS, IFNGR2, KRT1, PTPN6, IFNAR2, TAPBP, HLA-DOA, IRF4, AA…
HALLMARK_P53_PATHWAY	1.22529e-07	2.02439e-07	0.690132	0.414225	1.97239	180	HRAS, ST14, RPL36, PDGFA, STEAP3, CCND2, IP6K2, CDH13, PVT1, PRMT2, BLCAP, MAPKAPK3, RXRA, FBXW7, APP, CD82, CCND3, TRAFD1, BAIAP2, GLS2, VDR, RALGDS, PITPNC1, PLXNB2, OSGIN1, TP63, IER3, TGFA, ZBTB16, TPD52L1, NOTCH1, MKNK2, TM4SF1, DCXR, FOXO3, PTPRE, WRAP73, RNF19B, MDM2, ZNF365, RB1, RGS16, HBEGF, EPHA2, CD81, SFN, SPHK1, CASP1, NDRG1, ABAT, ABCC5, TNNI1, ADA, RAD9A, PLK2, PTPN14, S100A10, CC…
HALLMARK_INTERFERON_GAMMA_RESPONSE	8.63605e-07	1.39647e-06	0.659444	0.401785	1.91145	178	PFKP, STAT1, NFKB1, AUTS2, IL2RB, SECTM1, STAT3, TRAFD1, SELP, PDE4B, PARP12, MX1, PTPN2, NCOA3, CFB, IFI27, DHX58, LATS2, NUP93, IRF2, IL15, LGALS3BP, PLA2G4A, PSMB9, TNFAIP2, VCAM1, EPSTI1, LY6E, SP110, HLA-DMA, IRF7, ITGB7, RIPK1, HELZ2, BANK1, CASP7, ADAR, RSAD2, SPPL2A, GBP4, CMTR1, CASP1, ISG20, BST2, SSPN, WARS, IRF1, ARID5B, ST3GAL5, LAP3, XAF1, CASP4, PTPN6, OASL, IFNAR2, TAPBP, IRF4, C1…
HALLMARK_XENOBIOTIC_METABOLISM	2.60306e-06	4.12152e-06	0.627257	0.386064	1.8451	185	CASP6, PEMT, CD36, ACOX3, FBLN1, AOX1, ALAS1, SLC6A6, PC, SPINT2, F10, BCAR1, ALDH3A1, SAR1B, DDC, RAP1GAP, NDRG2, CFB, ASL, POR, UPB1, COMT, GCNT2, GSTO1, BCAT1, NPC1, DCXR, ACOX1, ESR1, TNFRSF1A, MTHFD1, SMOX, ETS2, TGFB2, SLC12A4, JUP, EPHA2, MAN1A1, MPP2, ACOX2, HSD11B1, SLC1A5, GAD1, GSR, LPIN2, BLVRB, PTGES3, CSAD, IGF1, TMEM176B, SHMT2, MARCH6, ELOVL5, GCLC, HACL1, CYP2S1, SLC6A12, FMO1, A…
HALLMARK_PEROXISOME	3.50435e-06	5.43532e-06	0.627257	0.448248	1.99439	99	HRAS, ATXN1, HSD11B2, ERCC1, CLN6, CACNA1B, ITGB1BP1, SLC23A2, MSH2, SULT2B1, ACSL1, SCP2, HSD3B7, TTR, HSD17B4, ABCC8, DHCR24, DLG4, ACOX1, SIAH1, IDE, ABCB9, CADM1, EHHADH, CRAT, ABCC5, CTPS1, ELOVL5, TSPO, PEX14, EPHX2, ABCB1, IDH2, ALB, CLN8, DHRS3, ALDH1A1, HSD17B11, ESR2, FIS1, SOD1, PRDX1, CAT, PEX11B, ERCC3, SLC25A19, TOP2A, CRABP1, SOD2, CRABP2, CTBP1, SMARCC1, LONP2
HALLMARK_ANDROGEN_RESPONSE	3.69912e-06	5.62267e-06	0.627257	0.471769	2.06858	88	ZMIZ1, AKT1, PTK2B, TPD52, CCND3, STK39, RAB4A, ACTN1, MAP7, GPD1L, TNFAIP8, HOMER2, HPGD, CAMKK2, AKAP12, UBE2I, DHCR24, ANKH, SEC24D, TMPRSS2, LIFR, SGK1, FKBP5, CDC14B, AZGP1, CDK6, ITGAV, NDRG1, GSR, BMPR1B, ARID5B, HERC3, ELOVL5, CCND1, SRF, KLK2, MERTK, XRCC5, ADAMTS1, PMEPA1, ABHD2, IQGAP2, ABCC4, INPP4B, ALDH1A3, ADRM1
HALLMARK_COAGULATION	1.09671e-05	1.63431e-05	0.593325	0.425081	1.93384	121	APOC1, C2, FYN, GNG12, CTSH, F3, F10, CAPN2, CTSB, GSN, DPP4, DUSP14, LRP1, PREP, SPARC, CAPN5, HPN, MMP11, CFB, PF4, COMP, PDGFB, CTSE, HTRA1, KLF7, VWF, THBD, ITGA2, CLU, WDR1, MMP2, CD9, F12, CPN1, FURIN, FN1, CRIP2, SERPINA1, ACOX2, SIRT2, CSRP1, C1S, PRSS23, TMPRSS6, MSRB2, C3, GP9, CPQ, FBN1, HNF4A, RAC1, ITIH1, F2, DUSP6, PLAT, GDA, CTSK, THBS1, CTSV, C1QA, OLR1, MASP2
HALLMARK_APICAL_SURFACE	1.22049e-05	1.78379e-05	0.593325	0.58357	2.11641	37	ADIPOR2, RTN4RL1, AFAP1L2, IL2RB, AKAP7, APP, SCUBE1, SULF2, MAL, PKHD1, CROCC, RHCG, CD160, MDGA1, NTNG1, ADAM10, EFNA5, LYPD3, GATA3
HALLMARK_PROTEIN_SECRETION	1.48116e-05	2.12393e-05	0.593325	0.447955	1.9553	85	PAM, EGFR, CTSC, ATP6V1H, TPD52, CLCN3, TMED10, ARFIP1, ABCA1, MAPK1, COG2, DST, RAB2A, ARFGEF1, GNAS, SEC24D, TSPAN8, ADAM10, STX7, SH3GL2, COPB1, SSPN, SCRN1, IGF2R, ICA1, AP1G1, KRT18, ARFGEF2, YKT6, SGMS1, CAV2, CLTC, SCAMP1, TOM1L1, KIF1B, RAB14, CD63, GALC, SOD1, TMX1, AP2S1, GBF1, BNIP3, NAPA, VPS45, AP2B1, GOLGA4
HALLMARK_G2M_CHECKPOINT	1.68524e-05	2.37181e-05	0.57561	0.372958	1.77589	180	STAG1, RASAL2, SRSF10, SLC7A1, TLE3, SMAD3, STMN1, BRCA2, TFDP1, PAFAH1B1, UPF1, FANCC, EZH2, HMGA1, ODF2, CUL1, NEK2, MEIS1, FOXN3, AURKA, EGF, NUMA1, E2F1, CTCF, LMNB1, KPNB1, SLC7A5, PRIM2, ABL1, MCM2, CHAF1A, EFNA5, SLC38A1, ORC5, ILF3, SYNCRIP, SQLE, CCNB2, RPS6KA5, RACGAP1, POLQ, INCENP, KIF11, CENPF, LBR, AURKB, CDC25B, CCND1, CHMP1A, KIF15, PLK1, TACC3, BIRC5, GINS2, POLE, BCL3, CDC7, CUL…
HALLMARK_TNFA_SIGNALING_VIA_NFKB	1.77997e-05	2.45959e-05	0.57561	0.375145	1.78471	178	PANX1, F2RL1, LAMB3, TRAF1, NFKB1, SMAD3, GFPT2, ACKR3, F3, PDE4B, MAP3K8, IRS2, EHD1, DUSP4, SPSB1, KDM6B, LITAF, TANK, ABCA1, RCAN1, EFNA1, IER3, TNFAIP8, JAG1, TNFAIP2, PTGER4, EGR2, B4GALT5, PTPRE, ATP2B1, BCL6, TNF, STAT5A, RNF19B, ETS2, SIK1, SLC2A6, RELB, SGK1, DUSP5, HBEGF, SPHK1, CXCL3, IL6ST, PFKFB3, TNIP2, MAP2K3, PLK2, IRF1, CCRL2, SDC4, IFNGR2, KLF9, NR4A2, CSF1, CCND1, CD44, KLF6, D…
HALLMARK_REACTIVE_OXYGEN_SPECIES_PATHWAY	2.2128e-05	3.00309e-05	0.57561	0.571173	2.09921	39	MSRA, ABCC1, PFKP, STK25, MBP, HHEX, IPCEF1, LSP1, NDUFS2, SBNO2, TXNRD2, PDLIM1, GSR, TXNRD1, GCLC, SCAF4, FES, MPO, SOD1, PRDX1, CAT, OXSR1, ATOX1, CDKN2D, SOD2, PRNP
HALLMARK_WNT_BETA_CATENIN_SIGNALING	2.32628e-05	3.10171e-05	0.57561	0.554788	2.06791	42	RBPJ, PTCH1, NOTCH4, NCOR2, AXIN1, TCF7, CCND2, CSNK1E, CUL1, WNT5B, JAG1, DLL1, NOTCH1, WNT6, FRAT1, HDAC5, MAML1, ADAM17, NKD1, AXIN2, FZD1, TP53, LEF1, CTNNB1, DVL2, HDAC2, PSEN2
HALLMARK_NOTCH_SIGNALING	3.46509e-05	4.54046e-05	0.557332	0.595744	2.06143	31	PRKCA, DTX1, TCF7L2, LFNG, CUL1, ARRB1, FZD7, FZD5, ST3GAL6, JAG1, DLL1, FBXW11, NOTCH3, MAML2, NOTCH1
HALLMARK_INTERFERON_ALPHA_RESPONSE	6.90372e-05	8.89293e-05	0.538434	0.438791	1.9092	82	TRAFD1, PARP12, ELF1, MX1, CD47, IFI27, DHX58, IRF2, IL15, LGALS3BP, PSMB9, EPSTI1, LY6E, SP110, IRF7, HELZ2, ADAR, RSAD2, GBP4, TRIM5, CMTR1, CASP1, ISG20, BST2, MVB12A, WARS, IRF1, CCRL2, LAP3, OASL, CSF1, C1S, IFITM3, BATF2, ISG15, RNF31, SAMD9, CASP8, NCOA7, SLC25A28, UBA7, GMPR, NMI, LAMP3, TRIM26, TRIM25, TXNIP, IL4R
HALLMARK_TGF_BETA_SIGNALING	0.000108633	0.000137602	0.538434	0.501602	1.95474	51	SKI, HIPK2, NCOR2, BCAR3, SMAD3, WWTR1, SMAD6, PPP1CA, RAB31, SPTBN1, ACVR1, LTBP2, FURIN, PPM1A, TGFBR1, HDAC1, SKIL, IFNGR2, TJP1, ENG, CDH1, CDKN1C, SLC20A1, PMEPA1, SMURF1, CTNNB1, THBS1, TGFB1, BMP2, ID1, SMAD7, CDK9, TGIF1, ID3, UBE2D3, PPP1R15A
HALLMARK_UV_RESPONSE_UP	0.000129946	0.000160856	0.518848	0.376317	1.75652	144	STK25, TST, BCL2L11, ALAS1, WIZ, CHKA, CCND3, MARK2, LHX2, ALDOA, AGO2, FGF18, CYB5B, PTPRD, IGFBP2, GLS, TGFBRAP1, MRPL23, OLFM1, NTRK3, DLG4, COL2A1, STARD3, FURIN, MGAT1, RAB27A, ATP6V1C1, IL6ST, HSPA13, CCK, IRF1, MSX1, TACR3, RXRB, CDKN1C, HLA-F, NPTX2, RASGRP1, EPCAM, YKT6, SLC6A12, FMO1, ASNS, BTG3, NR4A1, ABCB1, EPHX1, NAT1, DGAT1, SQSTM1, STIP1, PLCL1, AP2S1, HSPA2, HTR7, NFKBIA, CTSV, M…
HALLMARK_MTORC1_SIGNALING	0.000131224	0.000160856	0.518848	0.356407	1.702	182	ADIPOR2, SLC2A1, DHCR7, CTSC, EGLN3, SLC6A6, GSK3B, QDPR, ALDOA, ACACA, HK2, IFRD1, CYB5B, AURKA, SLC9A3R1, FAM129A, NUFIP1, DHCR24, BCAT1, PFKL, CD9, AK4, SLC7A5, NFYC, SSR1, ITGB2, TES, MCM2, PLOD2, SQLE, SLC1A5, GSR, MAP2K3, TM7SF2, CANX, TXNRD1, SKAP2, WARS, ADD3, SC5D, PHGDH, UCHL5, SRD5A1, HMBS, SHMT2, ELOVL5, P4HA1, GCLC, PIK3R3, YKT6, ASNS, PLK1, MCM4, TMEM97, NFKBIB, TBK1, TCEA1, POLR3G,…
HALLMARK_SPERMATOGENESIS	0.000156113	0.000188327	0.518848	0.396772	1.81057	119	PACRG, EZH2, STRBP, MLLT10, NOS1, LPIN1, NEK2, THEG, YBX2, ACRBP, MTOR, RAD17, SLC2A5, MAP7, AURKA, PGS1, CAMK4, CLVS1, SPATA6, DCC, HSPA1L, CLPB, POMC, SYCP1, TLE4, IDE, PIAS2, BRAF, MAST2, CCNB2, IP6K1, GAD1, CCT6B, ACE, ZC2HC1C, SCG5, TCP11, ADCYAP1, ZPBP, DNAJB8, CHFR, GRM8, AGFG1, CFTR, ELOVL3, PEBP1, CDKN3, COIL, HSPA2, PSMG1, BUB1, HTR5A, PCSK4, DMRT1, TSN
HALLMARK_IL6_JAK_STAT3_SIGNALING	0.000325001	0.000385939	0.498493	0.428262	1.81309	75	IFNAR1, STAT1, CD36, STAT3, TYK2, MAP3K8, PTPN2, LEPR, PDGFC, TNFRSF12A, IL17RA, TNFRSF1B, LTB, PIK3R5, PF4, IL12RB1, CD14, TNFRSF1A, CD9, TNF, CXCL3, OSMR, IL6ST, GRB2, IRF1, IFNGR2, CSF1, CD44, PLA2G2A, EBI3, IL2RA, CSF3R, ITGA4, PTPN11, TGFB1, IL10RB, ACVRL1, PTPN1, ACVR1B, IL1R1, CSF2RB, IL4R, HMOX1
HALLMARK_ANGIOGENESIS	0.00033686	0.000393868	0.498493	0.540259	1.90942	33	PDGFA, VAV2, CCND2, SERPINA5, APP, LPL, FSTL1, PF4, JAG1, THBD, ITGAV, PTK2, MSX1, SLCO2A1, LRPAP1, FGFR1
HALLMARK_CHOLESTEROL_HOMEOSTASIS	0.000594657	0.000684757	0.477271	0.439959	1.81163	65	DHCR7, CHKA, PCYT2, TNFRSF12A, CBS, LPL, SEMA3B, JAG1, FAM129A, ERRFI1, LSS, CLU, CD9, MAL2, SQLE, ALCAM, ANXA13, TM7SF2, SREBF2, SC5D, ANTXR2, PPARG, ANXA5, TMEM97, ATXN2, GLDC, HSD17B7, CTNNB1, PLAUR, ACSS2, HMGCR, FASN, CXCL16, MVD, HMGCS1, LGALS3, ACTG1, NFIL3, ABCA2, ETHE1, GUSB, FABP5, GSTM2, GNAI1, LGMN, TRIB3, FADS2, ATF3
HALLMARK_FATTY_ACID_METABOLISM	0.00124332	0.00141034	0.45506	0.354177	1.64044	139	ENO3, ADIPOR2, ALDH3A2, CD36, GPD2, ALDH3A1, ALDOA, ACSL1, HSD17B4, HPGD, REEP6, CPT1A, MGLL, DHCR24, PPARA, ACOX1, SUCLG2, PTPRG, HIBCH, INMT, SLC22A5, EHHADH, BLVRA, CD1D, CRAT, ACSS1, RAP1GDS1, BMPR1B, CPOX, IL4I1, ELOVL5, ECHS1, METAP1, S100A10, FMO1, UROS, EPHX1, ALDH1A1, ECI1, NTHL1, HSD17B11, AUH, SDHD, HSD17B7, CA4, ACADVL, GLUL, CIDEA, BPHL, FASN, HADH, CA2, PDHB, GRHPR, LGALS1, ACADS, M…
HALLMARK_BILE_ACID_METABOLISM	0.00247927	0.00277095	0.431708	0.367307	1.64329	103	ATXN1, BCAR3, NEDD4, RXRA, SLC23A2, SULT2B1, ACSL1, SCP2, HSD3B7, TTR, HSD17B4, ABCA1, ABCA4, NR3C2, SLC29A1, PFKM, DHCR24, ABCG4, NPC1, PHYH, PEX26, PIPOX, SLC23A1, CYP46A1, ABCA3, SLC22A18, HACL1, EPHX2, PAOX, IDH2, ALDH1A1, AGXT, KLF1, HSD17B11, HSD17B6, SOD1, CAT, PEX11G, SOAT2, CYP7B1, LCK, PEX12, ABCA9, LONP2, SLC27A5, ABCG8, IDH1, MLYCD, PEX6, CYP27A1, BMP6, GSTK1, ABCA2
HALLMARK_HEDGEHOG_SIGNALING	0.00694945	0.00765447	0.407018	0.496153	1.70058	30	PTCH1, ACHE, DPYSL2, TLE3, NRCAM, RTN1, TLE1, CELSR1, NRP2, ETS2, CDK6, MYH9, NF1, SCG2, UNC5C, PML, RASA1, CDK5R1, NRP1, CNTFR, GLI1, NKX6-1
HALLMARK_PANCREAS_BETA_CELLS	0.0208423	0.0226287	0.352488	0.433556	1.55889	35	GCK, VDR, PCSK2, DPP4, FOXO1, ABCC8, PAX4, SYT13, AKT3, STXBP1, PAX6, HNF1A, PKLR
HALLMARK_E2F_TARGETS	0.0230919	0.0247181	0.352488	0.29123	1.38839	181	STAG1, STMN1, BRCA2, EZH2, HMGA1, CIT, MSH2, WEE1, SLBP, POLD3, AURKA, AK2, TBRG4, CTCF, LMNB1, SMC6, RFC3, TK1, PRIM2, KIF18B, MELK, LYAR, MCM7, MCM2, ILF3, SYNCRIP, CCNB2, RACGAP1, DNMT1, CTPS1, LBR, AURKB, CDC25B, DIAPH3, PLK1, TACC3, MCM4, RANBP1, BIRC5, MLH1, POLD2, POLE, PAN2, GINS3, WDR90, SPC25, TUBB, CDKN3, TP53, TIPIN, POLA2, PPP1R8, PSIP1, MMS22L, NCAPD2, TOP2A, CDCA3, SPC24, KIF22, MC…
HALLMARK_MYC_TARGETS_V2	0.137022	0.144635	0.134273	0.331078	1.28035	49	MAP3K6, HK2, RCL1, RABEPK, TBRG4, SRM, SLC19A1, PES1, PPRC1, PUS1, PLK1, MCM4, TMEM97, NOP2, SLC29A2, MRTO4, TCOF1, MCM5, PRMT3, NOP56, GRWD1, GNL3, DUSP2, MYBBP1A, NOC4L, WDR43, NDUFAF4, WDR74, IMP4
HALLMARK_DNA_REPAIR	0.201381	0.208805	0.0992333	0.252306	1.16156	133	VPS37B, ERCC1, AAAS, TK2, CANT1, PDE4B, ZNF707, BCAM, POLD3, ELL, SMAD5, POLR1C, TARBP2, RAE1, ALYREF, TAF12, RFC3, GTF2B, ADA, POLR1D, ZNRD1, GMPR2, ADCY6, POLR3GL, NELFE, POLR2F, GUK1, TP53, ADRM1, POLA2, BRF2, ERCC3, CDA, NELFCD, PCNA, ERCC4, DGCR8, TYMS, CLP1, REV3L, RNMT, SNAPC4, AGO4, NPR2, TSG101, DCTN4, POM121, GTF2H1, POLD1, RPA3, CSTF3, NUDT9, POLD4, POLR2E, ERCC2, NFX1, TAF6, NME3, NEL…
HALLMARK_UNFOLDED_PROTEIN_RESPONSE	0.20331	0.208805	0.100279	0.265039	1.18413	101	YIF1A, PDIA6, EIF4A2, PDIA5, DNAJA4, CHAC1, DDX10, ERN1, IARS, YWHAZ, EXOC2, ATP6V0D1, CNOT6, SLC7A5, SSR1, SHC1, ZBTB17, ATF6, STC2, PARN, EIF4A3, EDC4, ASNS, BAG3, ALDH18A1, TTC37, WFS1, ARFGAP1, NFYA, EXOSC1, IGFBP1, NOP56, EIF2S1, POP4, NFYB, LSM4, PSAT1, CKS1B, DCTN1, ATF4, LSM1, XBP1, ATF3, GEMIN4, HYOU1, TATDN2, KDELR3, SLC1A4, CNOT4, TARS, SEC31A, DNAJB9, EXOSC2, EIF2AK3, SRPRB, CALR, EEF…
HALLMARK_OXIDATIVE_PHOSPHORYLATION	0.321348	0.325633	0.0721798	0.228884	1.07567	157	MTRR, MRPS22, ATP1B1, ALAS1, ATP6V1H, SDHB, OAT, PDHX, NDUFS2, CPT1A, COX4I1, POR, PHYH, UQCRC2, TIMM50, CASP7, CS, MFN2, NDUFA7, ATP6V1C1, SLC25A12, PDP1, NDUFS7, HTRA2, NDUFA5, GLUD1, PMPCA, OXA1L, ATP6V0E1, COX6C, ECHS1, OGDH, AFG3L2, IDH2, FXN, CYB5R3, ECI1, POLR2F, SDHD, CYB5A, COX10, ACADVL, NDUFS8, NDUFAB1, IMMT, PDHB, BAX, NDUFA8, NDUFV1
HALLMARK_MYC_TARGETS_V1	0.509413	0.509413	0.0494905	0.20797	0.989397	178	TFDP1, CUL1, EIF3J, IFRD1, FAM120A, SF3A1, IARS, MRPL23, CAD, CLNS1A, KPNB1, LSM7, HNRNPR, SRM, MCM7, MCM2, YWHAQ, RRM1, SYNCRIP, HNRNPC, STARD7, SERBP1, EIF4H, PSMA1, CANX, PTGES3, CTPS1, HNRNPA2B1, U2AF1, RPS3, MCM4, RANBP1, GLO1, POLD2, EXOSC7, PRPF31, ABCE1, UBE2E1, HDGF, EIF3B, UBE2L3, NDUFAB1, PSMD1, SMARCC1, RPS5, MCM5, PCNA, HDAC2, CCT5, G3BP1, SRSF7, PSMA7, NOP56, TYMS, LSM2, AP3S1, EIF2…

## Sheet: GSE_DMRs
pathway	pval	padj	log2err	ES	NES	size	Gene_Name
HALLMARK_INTERFERON_ALPHA_RESPONSE	0.00509379	0.387128	0.407018	0.860443	1.67777	6	BST2, MVB12A, TRIM5, IRF7
HALLMARK_INTERFERON_GAMMA_RESPONSE	0.0256835	0.55045	0.352488	0.742194	1.50473	10	BST2, IFNAR2, TAPBP, PFKP, IRF7, PTPN2
Down_Syndrome_text_mining	0.027972	0.55045	0.271289	0.546095	1.25717	63	EDNRB, ITSN1, PSMG1, BRWD1, GABPA, IFNAR1, IFNAR2, IL10RB, PLD6, PFKP, RCAN1, KCNE1, LHCGR, PCBP3, GRIK1, DSCR4, DSCR8, POMC
HALLMARK_APOPTOSIS	0.028971	0.55045	0.266351	0.680262	1.43648	15	IER3, AIFM3, BRCA1, BIRC3, IGF2R, CCND1, CD14, HGF, CCND2
HALLMARK_APICAL_SURFACE	0.0529471	0.804795	0.193813	0.709175	1.42224	9	RHCG, NTNG1, BRCA1
HALLMARK_INFLAMMATORY_RESPONSE	0.0639361	0.809857	0.175204	0.61184	1.3202	20	BST2, IFNAR1, TAPBP, IRF7, CD14, BDKRB1, SCN1B, HPN
Down_Syndrome	0.0869131	0.943628	0.148262	0.51991	1.1915	57	EDNRB, WDR46, ITSN1, BRWD1, HOXA10, NME2, BRCA1, STMN1, RCAN1, CCND1, GRIK1, CRH, SFRP1, ADAMTS1
Down_Syndrome_CNS_Brain_Cerebellum	0.102897	0.96532	0.135002	0.526611	1.19528	47	ITSN1, RCC2, PSMG1, IFNAR1, IFNAR2, IL10RB, FOXK2, OLFM1, ATF6B, PCID2, MYLK, COMTD1
HALLMARK_ALLOGRAFT_REJECTION	0.116883	0.96532	0.12564	0.582501	1.26594	21	IFNAR2, TAPBP, BRCA1, IRF7, HLA-DOA, CD8A, IGSF6, CCND2, PF4, INHBA
HALLMARK_COMPLEMENT	0.175824	0.96532	0.0988903	0.565222	1.21386	19	RNF4, IRF7, MMP15, GNGT2, LRP1, CTSD
HALLMARK_REACTIVE_OXYGEN_SPECIES_PATHWAY	0.203796	0.96532	0.0902635	0.645028	1.27406	7	PFKP, HHEX, TXNRD1
HALLMARK_E2F_TARGETS	0.220779	0.96532	0.0857844	0.602553	1.22162	10	BRCA1, STMN1, LIG1
HALLMARK_TNFA_SIGNALING_VIA_NFKB	0.253746	0.96532	0.0782955	0.540068	1.15252	18	IER3, BIRC3, RCAN1, CCND1, SMAD3, KDM6B
HALLMARK_DNA_REPAIR	0.256743	0.96532	0.0776799	0.609951	1.21448	8	LIG1, DDB2, TAF12, TK2, ZNF707
Allen_Brain_Atlas_Developing_Human_Brain_Tissue_Gene_Expression_Profiles_by_RNAseq_Cerebellar_Cortex	0.266733	0.96532	0.0756946	0.444863	1.05626	175	EDNRB, RNF144A, WNK4, DNAJC28, CRYZL1, MDFIC, NBL1, TRPC3, WDR88, KIFC3, RIN1, TRIM5, PDE1C, CEP104, FLRT1, SPACA6P, RNF4, GPR39, LYPD1, BZRAP1, SYNE1, B3GALNT1, TNFRSF10A, CBLN1, ORAOV1, PCBP3, SLC13A4, SOX7, GRIK1, ARPP21, RAB42, PAPLN, CLDN4, ANKRD11, INF2, SLC12A4, ZGPAT, LIME1, TBX6, TBR1, PALMD, DLX1, ADCY4, PLD5, LHX2, TMEM132B, TMEM71, TNFRSF25, TDRD5, ACSL1, FAM65A, PLEKHG3, FZD7, RECQL5…
Down_Syndrome_Brain	0.273726	0.96532	0.0743625	0.467893	1.07812	65	DNAJC28, BRWD1, HOXA10, CALCB, BRCA1, PROCA1, CHP2, PLTP, WT1, TOR4A, RCAN1, TRIM31, HLA-DOA, LRP1, SLC12A4, CAPZB, FOXN3, DNAJA4, PALMD
HALLMARK_WNT_BETA_CATENIN_SIGNALING	0.288711	0.96532	0.0716527	0.589436	1.18211	9	DLL1, FRAT1, CCND2
HALLMARK_COAGULATION	0.321678	0.96532	0.0662842	0.565992	1.14749	10	MMP15, HPN, LRP1, PF4, DUSP14
HALLMARK_IL6_JAK_STAT3_SIGNALING	0.328671	0.96532	0.0652353	0.552204	1.13169	11	IFNAR1, IL10RB, PTPN2, CD14, PF4, ITGA4
Allen_Brain_Atlas_Developing_Human_Brain_Tissue_Gene_Expression_Profiles_by_RNAseq_Primary_Somatosensory_Cortex_Area.S1_Areas3.1.2	0.333666	0.96532	0.0645031	0.452573	1.05208	79	RNF19A, ATP5J, WDR88, HYPK, KIFC3, BRCA1, PPP1R13L, TXNRD3, ATF6B, PTPN2, ULK2, DTX3, SYBU, COMTD1, ACTC1, SFRP1, TMEM150C, MGRN1, MPPED1, CSMD2, VOPP1, INHBA, FAM65A, RECQL5, PPFIA1, GALNT6, SEC31B, NDUFB8, ENC1, PRR16, CS, FREM1
HALLMARK_SPERMATOGENESIS	0.333666	0.96532	0.0645031	0.534685	1.11606	13	MAP7, PSMG1, POMC
Allen_Brain_Atlas_Developing_Human_Brain_Tissue_Gene_Expression_Profiles_by_RNAseq_Primary_Auditory_Cortex.Core	0.336663	0.96532	0.0640704	0.450918	1.04895	83	DNAJC28, ERVMER34-1, RNF19A, WDR88, FLRT1, HYAL1, PPP1R13L, FUCA1, LPIN3, TXNRD3, TXNRD3NB, PCID2, PTPN2, ULK2, CLDN4, SYBU, ACTC1, LIME1, SLC2A4RG, SCD5, TMEM150C, VOPP1, INHBA, PPARA, RECQL5, PPFIA1, SEC31B, ENC1, PKD1, PRR16, MOV10L1, CS
Down_Syndrome_Fetus	0.351648	0.96532	0.0619763	0.467294	1.06193	48	EDNRB, SPG7, BRD4, VAX2, RCAN1, KDM6B, HPN, CLDN4, CASR, SLC12A4, MICAL3, CYR61, SCD5, TSPAN18, ECE2, LHX2, PLEKHG3, FAM198B, CDCP1
HALLMARK_KRAS_SIGNALING_UP	0.373626	0.96532	0.0590955	0.494474	1.07464	21	MAP7, BIRC3, FUCA1, SCN1B, GYPC, IKZF1, CCND2, INHBA
HALLMARK_ANDROGEN_RESPONSE	0.386613	0.96532	0.0574877	0.557164	1.10938	8	MAP7, CCND1, ADAMTS1, PMEPA1, CCND3
HALLMARK_CHOLESTEROL_HOMEOSTASIS	0.391608	0.96532	0.0568864	0.579707	1.13036	6	MAL2, TP53INP1, ACTG1
HALLMARK_ADIPOGENESIS	0.394605	0.96532	0.05653	0.505355	1.07522	17	ITSN1, RAB34, MYLK, DNAJC15
HALLMARK_EPITHELIAL_MESENCHYMAL_TRANSITION	0.408591	0.96532	0.0549074	0.488661	1.05441	20	LOXL1, COL12A1, FUCA1, MYLK, LRP1, SFRP1, INHBA, MEST, COL5A1, PMEPA1
HALLMARK_G2M_CHECKPOINT	0.40959	0.96532	0.054794	0.505983	1.06355	14	STMN1, CCND1, SMAD3, FOXN3, AURKA
Allen_Brain_Atlas_Developing_Human_Brain_Tissue_Gene_Expression_Profiles_by_RNAseq_CTD.Gene_Disease.Associations_ID	0.472527	0.96532	0.048215	0.489833	1.0296	14	FGFR2, HDAC4, KDM6B, CHL1, SLC4A10, ALDH5A1, RAI1
HALLMARK_GLYCOLYSIS	0.484515	0.96532	0.04707	0.481621	1.01702	15	IER3, PFKP, STMN1, SLC16A3, DSC2, PGAM2, AURKA, COL5A1
HALLMARK_ANGIOGENESIS	0.504496	0.96532	0.0452247	0.536103	1.04534	6	SERPINA5, CCND2, PF4, VAV2
HALLMARK_APICAL_JUNCTION	0.535465	0.96532	0.0425023	0.45071	0.984584	22	WNK4, SGCE, CLDN4, ACTC1, ACTG1, VAV2, PKD1
HALLMARK_NOTCH_SIGNALING	0.547453	0.96532	0.041488	0.502794	1.00112	8	DLL1, CCND1, FZD7, LFNG
HALLMARK_P53_PATHWAY	0.557443	0.96532	0.0406579	0.444065	0.975558	24	TM4SF1, IER3, FUCA1, DDB2, CTSD, CCND2, UPP1, CD82, BLCAP, PVT1, CCND3
Allen_Brain_Atlas_Developing_Human_Brain_Tissue_Gene_Expression_Profiles_by_RNAseq_Orbital_Frontal_Cortex	0.569431	0.96532	0.0396787	0.417008	0.985926	141	MORC2-AS1, RPS18, RNF19A, WDR88, LRRD1, NFATC4, TBC1D16, RHCG, FLRT1, SPACA6P, PPP1R13L, SPG7, FUCA1, STMN1, B3GALNT1, TOR4A, TXNRD3NB, CCND1, HHEX, SMAD3, PCID2, BOD1L2, CD8A, SLC14A1, MYLK-AS1, ANKRD11, IQSEC1, SYBU, CTSD, LIME1, DSC2, SYCP2L, PALMD, MRPL23, PDE6B, SH2D7, COMMD7, WRB, LEPROTL1
HALLMARK_OXIDATIVE_PHOSPHORYLATION	0.572428	0.96532	0.0394367	0.492118	0.97203	7	CPT1A, NDUFB8, CS, NQO2, COX6C
HALLMARK_MYOGENESIS	0.576424	0.96532	0.0391155	0.434756	0.966561	30	KIFC3, FXYD1, COX6A2, MYLK, ACTC1, RYR1, IFRD1, MYO1C, ACSL1, PGAM2, MYOM2, CAMK2B, NAV2, NOS1, BHLHE40
Abnormality_Of_Neuronal_Migration	0.582418	0.96532	0.0386372	0.450384	0.958263	17	GDF6, ANKRD11, CCND2, ACTG1, PEX10, AIPL1
Allen_Brain_Atlas_Developing_Human_Brain_Tissue_Gene_Expression_Profiles_by_RNAseq_Posterior.Caudal_Superior_Temporal_Cortex_Area.22c	0.624376	0.96532	0.0353911	0.412104	0.96832	113	RPS18, DNAJC28, CECR2, ERVMER34-1, WDR88, NME1-NME2, NME2, TBC1D16, IER3, PDE1C, SPACA6P, STMN1, STON1-GTF2A1L, TNXB, ATF6B, HHEX, PTPN2, SOX7, CD8A, DTX3, GTF2H4, SYBU, IGSF6, COMTD1, MICAL3, TRIP12, FRAT1, SH2D7, COMMD7, LHX2, VOPP1, BBX, PPARA, RECQL5, HLCS, PPFIA1, ACSS3, PRR16, FREM1, PSMG4, NAT16, SDCCAG8, FBXL18, LRRC26, RASGEF1C, IFNGR2, NLRP1, DOK3
HALLMARK_HEME_METABOLISM	0.631369	0.96532	0.0348652	0.459662	0.93192	10	RNF19A, DMTN, GYPC
Allen_Brain_Atlas_Developing_Human_Brain_Tissue_Gene_Expression_Profiles_by_RNAseq_Mediodorsal_Nucleus_Of_Thalamus	0.644356	0.96532	0.0338984	0.406575	0.969924	221	WNK4, TLR5, CECR2, ZNF497, FSCN2, COLCA1, COLCA2, WDR88, LRRD1, SERINC4, SLC5A2, NME2, RIN1, IER3, PDE1C, LRRFIP1, PLD6, NTNG1, CEP104, BZRAP1, PPP1R13L, COL12A1, SYNE1, FUCA1, B3GALNT1, MFAP4, TMEM173, CBLN1, ORAOV1, TNXB, PCBP3, SLC13A4, HLA-DOA, HDAC4, GRIK1, PAPLN, UBE2E2, ANKRD11, ACTC1, ZGPAT, LIME1, SPESP1, SLC22A18, TBR1, CRTAC1, MPPED1, PDE6B, ASS1, RTEL1, SH2D7, ECE2, COMMD7, WRB, VOPP1…
HALLMARK_UV_RESPONSE_UP	0.66034	0.96532	0.0327242	0.437308	0.912802	13	CCK, OLFM1, MRPL23, LHX2, HSPA13, COL2A1, CCND3, AP2S1
HALLMARK_ESTROGEN_RESPONSE_LATE	0.663337	0.96532	0.0325058	0.414648	0.912793	26	NBL1, OLFM1, CCND1, GPER1, SLC27A2, ASS1, SERPINA5, FOXC1, SCNN1A, MEST, COX6C, EMP2, CHST8, TH, ITPK1, BLVRB
HALLMARK_FATTY_ACID_METABOLISM	0.678322	0.96532	0.0314209	0.442386	0.880842	8	PCBD1, CPT1A, ACSL1, PPARA, ALDH3A1, CYP1A1
Allen_Brain_Atlas_Developing_Human_Brain_Tissue_Gene_Expression_Profiles_by_RNAseq_Striatum_24	0.684316	0.96532	0.0309901	0.404067	0.951297	125	B3GALT4, WNK4, RCC2, RHCG, BRCA1, CCK, PEG10, SPACA6P, RNF4, COL12A1, PCDHGA5, RCAN1, CHRD, CCND1, ORAOV1, ATF6B, HHEX, SLC13A4, SOX7, ARPP21, ARHGEF25, RAB42
HALLMARK_PROTEIN_SECRETION	0.692308	0.96532	0.0304181	0.439479	0.840462	5	IGF2R, AP2S1, ATP1A1, STX12
HALLMARK_BILE_ACID_METABOLISM	0.7003	0.96532	0.0298485	0.427038	0.875174	11	ABCA4, SLC22A18, SLC27A2, ACSL1
HALLMARK_MYC_TARGETS_V1	0.707293	0.96532	0.0293519	0.417172	0.865856	12	CCT3, MRPL23, IFRD1, EIF4E
HALLMARK_UNFOLDED_PROTEIN_RESPONSE	0.724276	0.96532	0.0281515	0.410663	0.800746	6	DNAJA4, EIF4E, YIF1A
HALLMARK_HYPOXIA	0.726274	0.96532	0.0280107	0.397629	0.870181	23	IER3, PFKP, HK1, PCK1
Alzheimers_Disease_CNS_Brain_Hippocampus	0.748252	0.96532	0.0264649	0.39138	0.883921	41	HYPK, NME2, FLOT1, BZRAP1, TLE2, DTX3, CTBP1, SAE1, LEPROTL1, UPP1, GPLD1, NCLN, IFNGR2, TK2, YIF1A, SPG11
Allen_Brain_Atlas_Developing_Human_Brain_Tissue_Gene_Expression_Profiles_by_RNAseq_Anterior.Rostral_Cingulate.Medial_Prefrontal_Cortex	0.773227	0.96532	0.0247086	0.392274	0.911906	79	RNF144A, WDR88, LRRD1, HYPK, PPP1R13L, FUCA1, STMN1, B3GALNT1, ZNF114, PCBP3, ULK2, PAPLN, GRASP, DSC2, TMEM150C, PALMD, MRPL23
Allen_Brain_Atlas_Developing_Human_Brain_Tissue_Gene_Expression_Profiles_by_RNAseq_Primary_Motor_Cortex_Area.M1_Area.4	0.774226	0.96532	0.0246382	0.390405	0.906833	76	RPS18, DNAJC28, LRRD1, NME1-NME2, NME2, SPACA6P, FUCA1, TXNRD3, PCID2, CLDN4, ANKRD11, IGSF6, LIME1, PDE6B, SH2D7, LSMEM1, TMEM71, BBX, RECQL5, PPFIA1, GALNT6, PKD1
HALLMARK_UV_RESPONSE_DN	0.781219	0.96532	0.0241448	0.385187	0.827218	19	SYNE1, SMAD3, CELF2, SLC22A18, VAV2, BHLHE40, WDR37
HALLMARK_KRAS_SIGNALING_DN	0.782218	0.96532	0.0240742	0.378836	0.833492	25	CALCB, ARPP21, ACTC1, RYR1, PDCD1, PDE6B, KRT5, COL2A1, NOS1, LFNG
HALLMARK_MTORC1_SIGNALING	0.798202	0.96532	0.0229406	0.384685	0.798429	12	PSMG1, TXNRD1, IFRD1, AURKA, BHLHE40
Allen_Brain_Atlas_Developing_Human_Brain_Tissue_Gene_Expression_Profiles_by_RNAseq_Primary_Visual_Cortex_Striate_Cortex_AreaV1.17	0.808192	0.96532	0.0222268	0.382011	0.87783	59	RNF144A, RNF19A, WDR88, RIN1, NTNG1, ATF6B, PTPN2, GTF2H4, ACTC1, TMEM150C, MGRN1, PCBD1, LHX2, CCND2, PPARA, BAIAP2-AS1, SEMA6C, PSMG4, SLC22A23, NOS1, F7, CDYL
Allen_Brain_Atlas_Developing_Human_Brain_Tissue_Gene_Expression_Profiles_by_RNAseq_Dorsolateral_Prefrontal_Cortex	0.809191	0.96532	0.0221551	0.386875	0.903411	93	WFIKKN2, RNF19A, LRRD1, FLRT1, SPACA6P, PPP1R13L, FUCA1, STMN1, ORAOV1, SMAD3, SOX7, ULK2, CLDN4, SYBU, EID3, DSC2, TMEM150C, PALMD, TMCO3, BBX, TDRD5, ITGA4, SDK1, RECQL5, PPFIA1, SEC31B, PRR16, CS, FREM1
Intellectual_Disability	0.809191	0.96532	0.0221551	0.373482	0.797023	18	FGFR2, HDAC4, ANKRD11, ACTG1, ARID1B, BBS4, THOC6
HALLMARK_ESTROGEN_RESPONSE_EARLY	0.833167	0.96532	0.020416	0.36011	0.796811	28	NBL1, OLFM1, CCND1, SYBU, SLC27A2, FOXC1
HALLMARK_IL2_STAT5_SIGNALING	0.834166	0.96532	0.0203426	0.362373	0.787541	21	IGF2R, CCND2, MYO1C, AHNAK, CDCP1, CCND3, BHLHE40, MAP3K8, SOCS2, CYFIP1, NCS1
Allen_Brain_Atlas_Developing_Human_Brain_Tissue_Gene_Expression_Profiles_by_RNAseq_Inferolateral_Temporal_Cortex_Area.Tev_Area.20	0.848152	0.96532	0.0193046	0.3758	0.872342	77	ERVMER34-1, RNF19A, HYPK, BRCA1, SPACA6P, PPP1R13L, RNF135, B3GALNT1, ULK2, HLA-DOA, GTF2H4, CELF2, SYBU, ACTC1, PIK3R1, TMEM150C, INPP5A, CSMD2, LHX2, ITGA4, PPARA, RECQL5, PPFIA1, SEC31B, NDUFB8, PRR16, CS, CDYL, RASGEF1C, IFNGR2, PLXNC1, BHLHE40-AS1, CDK2AP1, NET1, MAP3K8, SOCS2-AS1, SOCS2, MSI2, PRDM5
Allen_Brain_Atlas_Developing_Human_Brain_Tissue_Gene_Expression_Profiles_by_RNAseq_Ventrolateral_Prefrontal_Cortex	0.855145	0.96532	0.0187776	0.375735	0.874462	85	DNAJC28, RNF19A, LRRD1, RHCG, FLRT1, SPACA6P, FUCA1, STMN1, STON1-GTF2A1L, TXNRD3, BOD1L2, SOX7
HALLMARK_TGF_BETA_SIGNALING	0.864136	0.96532	0.0180906	0.341707	0.692777	10	SMAD3, PMEPA1, IFNGR2
HALLMARK_PANCREAS_BETA_CELLS	0.873127	0.96532	0.0173915	0.293316	0.560938	5	ABCC8, GCK, DPP4, PAX6, CHGA
HALLMARK_MITOTIC_SPINDLE	0.875125	0.96532	0.0172343	0.344393	0.734947	18	ITSN1, CAPZB, SORBS2, BCAR1, AURKA, NET1, KLC1, CDC42EP1, ARHGEF11, TBCD, MARK4
HALLMARK_MYC_TARGETS_V2	0.881119	0.96532	0.0167582	0.117208	0.234669	1	SRM
Allen_Brain_Atlas_Developing_Human_Brain_Tissue_Gene_Expression_Profiles_by_RNAseq_Hippocampus_Hippocampal_Formation	0.885115	0.96532	0.0164369	0.374247	0.887888	163	CACNA1C-AS1, TLR5, WFIKKN2, MDFIC, TRPC3, WDR88, LRRD1, TBC1D16, CEP104, TFAP2E, SPACA6P, BZRAP1, PLTP, SYNE1, FUCA1, B3GALNT1, ORAOV1, CCDC108, CLDN4, DGKZ, ANKRD11, TXNRD1, ZGPAT, LIME1, IGDCC4, MICAL3, CAPZB, DLX1, TUT1, INPP5A, ADCY4, GYPC, RTEL1, WRB, CCND2, TNFRSF25, INHBA, NXPE3, FZD7, RECQL5, RGS12, PPFIA1, CCDC92, SEC31B, PKD1, BRSK2, RGS22, EFCAB1, PARVB, METAP1D, KAZALD1, NCLN, MEST, A…
HALLMARK_XENOBIOTIC_METABOLISM	0.889111	0.96532	0.0161122	0.327695	0.671581	11	SLC12A4, UPP1, BCAR1, ALDH3A1, CYP1A1, BLVRB
HALLMARK_PEROXISOME	0.931069	0.996637	0.0124136	0.291248	0.604497	12	CTBP1, SLC27A2, ACSL1, ITGB1BP1
HALLMARK_HEDGEHOG_SIGNALING	0.959041	0.998002	0.00942834	0.178331	0.34104	5	DPYSL2, CNTFR, PTCH1, ACHE, SLIT1
Intellectual_Disability_text_mining	0.971029	0.998002	0.00788031	0.348854	0.827743	160	CACNA1C, ITSN1, PSMG1, FOXL2, GABPA, NTNG1, SGCE, FGFR2, FOXK2, SPG7, WT1, FUCA1, RCAN1, TLE2, CBLN1, HDAC4, GRIK1, DSCR4, GTF2H4, TTLL6, POMC, ANKRD11, KCNAB2, TBX6, KANK1, TBR1, SLC4A10, DLX1, INPP5A, ASS1, PCBD1, LAX1, SAE1, FOXC1, ACTG1, ZNF569, PLEKHG3, PPFIA1, SLC4A8, PEX10, ALDH5A1, SNX3, EIF4E, RBFOX1, DMRT2, NCLN, DSCAM, RAI1, SECTM1, LFNG, CNIH2, NELFA, OTX2, BHLHE40, SPG11, ALX4, ARID1…
Allen_Brain_Atlas_Developing_Human_Brain_Tissue_Gene_Expression_Profiles_by_RNAseq_amygdaloid_complex	0.983017	0.998002	0.00599657	0.342941	0.820079	240	CACNA1C, RNF144A, RPS18, B3GALT4, RCC2, MDFIC, FLG-AS1, KIFC3, TRIM5, LGI4, PFKP, GANC, SGCE, LOXL1, MMP15, COL12A1, OLFM1, RCAN1, STON1-GTF2A1L, ATF6B, CERK, SLC13A4, ARPP21, MYLK, UBE2E2, SH3BP1, SLC15A2, SYBU, TXNRD1, EID3, TGFB1I1, SFRP1, IGDCC4, TP53INP1, DNAJC15, TBX6, ALDH1L2, FOXN3, SLC27A2, DLX1, GALNT9, DMTN, MAGI3, GYPC, HSPA12A, LHX2, TMEM132B, CCND2, INPP5K, SH2D3C, NXPE3, CELF6, PHA…
Neuronal_System	0.992008	0.998002	0.00409492	0.25766	0.582347	40	BZRAP1, GNGT2, GRIK1, KCNAB2, ADCY4, CACNB1, HCN4, PPFIA1, ALDH5A1, CAMK2B, CACNA2D3, KCNJ5, AP2S1, GNG4, KCNA1, GABBR1, KCNQ1, KCNG1, KCNJ12, SLC6A3, CACNA1E
HALLMARK_PI3K_AKT_MTOR_SIGNALING	0.998002	0.998002	0.0020413	0.0700521	0.142024	10	CAMK4, ITPR2, SLA, EGFR, PFN1, ADCY2, HRAS, RPTOR, TSC2, EIF4E

## Sheet: GSE_DEG
pathway	pval	padj	log2err	ES	NES	size	Gene_Name
Down_Syndrome_text_mining	0.00102473	0.0778796	0.45506	-0.296947	-1.50818	218	PRMT2, PDE9A, POFUT2, NDUFV3, PDXK, SUMO3, GABPA, JAM2, OTUB1, CTSB, PCNT, APP, MORC3, CHAF1B, SOD1, UNC5A, ACTG1, TTC3, NCK2, COL18A1, ITSN1, JAK3, TMEM50B, HRAS, TIAM1, MCM3AP, HSPA13, CXADR, PTTG1IP, RRP1B, CCT8, JAK1, PFKM, NLGN2, CRADD, CD34, GPX4, HMGN1, VAC14, SETD4, EDNRB, RTN1, IFNGR2, PHB2, GLIS2, EIF3F, GAPDH, PIGP, CRELD1, CORO7, MAP4, WRB, RBM11, PFKP, IFNAR2, DYRK1A, SIM2, GART, GAB…
Allen_Brain_Atlas_Developing_Human_Brain_Tissue_Gene_Expression_Profiles_by_RNAseq_Anterior.Rostral_Cingulate.Medial_Prefrontal_Cortex	0.00493795	0.156624	0.407018	0.309816	1.39619	363	FAM110C, PCDH17, CBLN2, FNIP2, TIGD6, ZNF114, SEMA3C, FNDC1, ACACA, STK32B, MDH1B, PTPRO, ABHD1, EXOC6, PET117, MATN1, GRM5, VSTM2L, MDGA1, SULF1, SOSTDC1, SYT4, GRP, SMARCA2, CSMD3, GAS2, SLC26A11, DIS3L, IGSF9B, NAV3, CPNE8, DSC2, PLXNC1, MYO16, PCDHA7, SDK2, PPCDC, DCTN1-AS1, TMEM62, COCH, PCDHA11, PAPPA, CCDC144A, CRIM1, PROM1, APBB2, IMMP1L, VKORC1, WWP2, CDH10, B4GALT5, SLC37A3, PCDHA9, SH3…
Allen_Brain_Atlas_Developing_Human_Brain_Tissue_Gene_Expression_Profiles_by_RNAseq_Ventrolateral_Prefrontal_Cortex	0.00618254	0.156624	0.407018	0.303004	1.36749	375	FAM110C, CNIH3, CBLN2, FNIP2, CNTN4, GALNT2, DKK1, ADCY8, FPGT-TNNI3K, FNDC1, COL6A3, NPNT, ADAM12, TMEM200C, STK32B, SLC7A7, KLHL14, EXOC6, PEG3, MTUS1, VSTM2L, SULF1, SOSTDC1, SYT4, SDK1, GRP, SLC9A2, SLC26A11, IGSF9B, SCAF11, CPNE8, DSC2, ADAMTS9-AS2, RNF19A, MYO16, ADAMTS9, PTCH1, PCDHA7, RNF130, ALX4, PHYH, IMPA2, TMEM62, COCH, GPT, PCDHA11, COL1A2, RFX5, PROM1, FGGY, WWP2, CDH10, SLC16A5, M…
Down_Syndrome	0.0130921	0.212748	0.38073	-0.256001	-1.29971	227	VEGFA, ANKS1B, PDXK, LAMA5, CTSB, APP, SLC9A3R1, CHAF1B, SOD1, GSTP1, TTC3, NDRG1, STMN1, ITSN1, JAK3, GPSM1, NCOR2, THRA, MAGI2, DRD4, AKT2, HMGB1, WDR46, PRR5, MYCN, TNFRSF1A, SNCA, MITF, PCGF2, AGER, SMG6, JAK1, STAT3, MAPK3, NPHS1, MAD2L2, SLC45A3, THBS1, PIN1, CCND1, EDNRB, SORL1, SGTA, CTNNB1, PIGP, CRELD1, PRDX2, PFN1, SLC39A4, LIMK1, MEN1, DYRK1A, HLA-A, SIM2, TRADD, SPHK1, AKT1, GART, NF…
HALLMARK_MYC_TARGETS_V1	0.0153883	0.212748	0.38073	-0.395504	-1.54511	48	LDHA, PSMD8, EIF4H, POLD2, CUL1, LSM7, SERBP1, LSM2, SNRPG, PHB2, RPS3, PABPC4, ACP1, MCM7, YWHAE, ODC1, YWHAQ, MRPL23, SF3A1
Allen_Brain_Atlas_Developing_Human_Brain_Tissue_Gene_Expression_Profiles_by_RNAseq_Striatum_24	0.0167959	0.212748	0.352488	0.280441	1.27978	474	FAM110C, PCDH10, KCNA5, FBXW7, RAB4B, ROBO1, MYO1B, NUF2, MSRB3, F2RL1, DRD2, ARL4C, FZD4, DYSF, PDE10A, CNTNAP2, KLHL14, ADAP2, DACT2, PREX2, RASSF3, MDGA1, PTGER4, CLGN, SOSTDC1, OLFML2B, GTSE1, TENM3, SACS, GRP, LAMP5, RUNX2, DIS3L, SMOC2, COL12A1, HTR7P1, CGNL1, DCHS2, EPN3, TSPAN9, BIRC5, NOS1, KAZALD1, FREM1, FILIP1L, ADAMTS9-AS2, ADORA2A, TMEM192, EFHC1, KCNK9, PLXNC1, ARRDC2, LMBR1, MGST2…
Allen_Brain_Atlas_Developing_Human_Brain_Tissue_Gene_Expression_Profiles_by_RNAseq_Primary_Visual_Cortex_Striate_Cortex_AreaV1.17	0.023895	0.259431	0.352488	0.306142	1.34124	252	PCDH17, AJAP1, GRIK2, DPF3, TCERG1L, TMEM232, LSAMP, STK32B, KCNA1, MDH1B, SETD9, LRP1B, PDE8A, PEG3, MTUS1, ZBTB7C, INPP4B, MYADML2, ADAMTSL5, TMEM56, ZCWPW2, IGSF9B, ST3GAL5, USH2A, NOS1, RNF19A, PTPRJ, BTBD3, PPCDC, PHYH, RGS16, BRINP1, PAPPA, ZBTB20, PLCXD3, DERA, IMMP1L, F7, B4GALT5, BTD, OXNAD1, MYO7A, PLXNA2, PIK3AP1, ADCY1, SGMS1, PDE7B, TMEM132E, ACADM, RALB, MGST1, DGKH, SV2C, SLC6A7, L…
HALLMARK_CHOLESTEROL_HOMEOSTASIS	0.0290015	0.262939	0.352488	-0.494662	-1.58493	22	LPL, ACTG1, LSS, STX5, ECH1, SEMA3B, CTNNB1, ABCA2, MAL2, PLAUR, CBS
HALLMARK_ANGIOGENESIS	0.0311375	0.262939	0.352488	-0.650361	-1.65585	10	VEGFA, APP, LPL
Allen_Brain_Atlas_Developing_Human_Brain_Tissue_Gene_Expression_Profiles_by_RNAseq_Primary_Somatosensory_Cortex_Area.S1_Areas3.1.2	0.0402259	0.305717	0.321776	-0.220971	-1.16974	346	EXPH5, CRIP2, NDUFV3, EML6, SYNGAP1, STX3, EXOC4, IL27RA, SEZ6L, LPL, CHST8, ATF4, MMP17, SYBU, BOC, CAMKV, DLGAP4, CACNG7, CREB5, CDH3, PPP1R13L, ISYNA1, MAST1, IGSF21, CLIP3, SLBP, ARHGAP33, CAPN1, COMTD1, TSPO, SEMA7A, RHOBTB1, LARP4B, INHBA, RECQL5, CELF3, LRRN3, PACS1, FAM81A, THBS1, RNF149, FOXP1, MEF2C, VAC14, MRPS2, SLC35C1, SMTNL2, RTN1, TUB, VOPP1, LRRC73, SERTAD2, P2RX4, GNAO1, DALRD3,…
HALLMARK_XENOBIOTIC_METABOLISM	0.0506072	0.34965	0.321776	-0.334272	-1.36735	58	CSAD, RAP1GAP, NDRG2, JUP, TNFRSF1A, ABHD6, ECH1, LONP1, ACOX3, BLVRB, EPHX1, TGFB2, SPINT2, GART, PYCR1, ACP1
HALLMARK_MYOGENESIS	0.0605257	0.354433	0.321776	-0.297756	-1.33102	91	EFS, ABLIM1, APP, AEBP1, CAMK2B, DMPK, BHLHE40, SPEG, DAPK2, SIRT2, PDLIM7, AKT2, CFD, SGCD, PFKM, PTP4A3, MAPRE3, MEF2C, PLXNB2, CHRNB1
HALLMARK_APICAL_SURFACE	0.0652866	0.354433	0.222056	0.48583	1.42979	22	SULF2, SCUBE1, MDGA1, LYN, CD160, ATP8B1, RTN4RL1, BRCA1, CX3CL1, AKAP7, TMEM8B
HALLMARK_MITOTIC_SPINDLE	0.0652903	0.354433	0.287805	-0.297068	-1.3099	85	EZR, PCNT, NCK2, ITSN1, MYO1E, KLC1, CAPZB, TIAM1, CYTH2, WASF2, FLNB, CCNB2, CLIP2, MARK4, NUMA1, SMC4, PREX1, ARHGEF2, RALBP1, FSCN1, ARHGAP27, SUN2, CNTROB, SORBS2, SYNPO, YWHAE, FGD6
Allen_Brain_Atlas_Developing_Human_Brain_Tissue_Gene_Expression_Profiles_by_RNAseq_Dorsolateral_Prefrontal_Cortex	0.0743169	0.364037	0.169571	0.269399	1.22169	402	CBLN2, FNIP2, TIGD6, CNTN4, GALNT2, DKK1, ADCY8, SEMA3C, FNDC1, ACACA, COL6A3, NPNT, TMEM200C, STK32B, DRD2, PTPRO, KLHL14, EXOC6, PEG3, VSTM2L, SULF1, SOSTDC1, SYT4, SDK1, GRP, CSMD3, PDE4D, IGSF9B, NAV3, USH2A, CPNE8, DSC2, FREM1, RNF19A, MYO16, ADAMTS9, PTCH1, PCDHA7, PPCDC, NAALADL2, DCTN1-AS1, TMEM62, CTHRC1, COCH, BMP2, ATP8B1, ADHFE1, GPT, PCDHA11, RFX5, PROM1, APBB2, PDSS1, TEC, WWP2, B4G…
Down_Syndrome_CNS_Brain_Cerebellum	0.0766393	0.364037	0.287805	-0.233546	-1.17329	203	NDUFV3, SON, SOD1, RALY, SMARCD1, ACIN1, ITSN1, DMPK, YTHDF1, TIMM13, PDLIM7, COMTD1, PCBP4, RABGGTB, CUL1, CORO1A, CAPN10, DDX6, HMGN1, RAB7A, SLC25A4, AKR1B1, SLC25A39, MRPS2, PLXNB2, GAPDH, GNAI2, SQSTM1, STK11IP, DTNB, NEDD8, PAPSS1, LIMK1, COX4I1, IFNAR2, CXCL12, DYRK1A, GART, IFT27, TSTA3, USP7, CLK3, COQ10A, PBX2, CCND3, DPYSL4, ACP1, LIMD1, NUBP1, UNC45A, ITPK1, HSD17B4, YWHAQ, PAM16, DNP…
HALLMARK_INTERFERON_GAMMA_RESPONSE	0.0945559	0.411911	0.172324	0.368487	1.30739	54	OAS3, ST8SIA4, ST3GAL5, HLA-DMA, AUTS2, SP110, WARS, PSMB10, UPP1, NLRC5, ARID5B, PDE4B, TNFAIP3, NOD1, IL7, HELZ2
HALLMARK_APOPTOSIS	0.101974	0.411911	0.257206	-0.313774	-1.26985	56	APP, SOD1, FEZ1, ADD1, FDXR, TSPO, PPP2R5B, GPX4, RARA, CCND1, CTNNB1, SQSTM1, TGFB2, IER3, CCND2
Neuronal_System	0.102978	0.411911	0.152145	0.30248	1.24183	139	GRIK2, KCNA5, GRIK3, ADCY8, KCNA1, KCNJ6, GRIN2B, KCNK4, GABRA5, KCNB1, ADCY2, PANX1, KCNQ5, CHRNA2, KCNK9, CACNG2, KCNMB2, CACNA1A, KCNAB1, CACNA1E, KCNA4, GABRB3, ABCC9, ADCY1, SLC38A2, KCNC1, CACNB4, GNG7, KCNN3
HALLMARK_FATTY_ACID_METABOLISM	0.137615	0.522936	0.2114	-0.322986	-1.23159	44	LDHA, ALDH3A2, AUH, ECH1, BLVRA, HMGCL, EPHX1, NTHL1, HIBCH, REEP6, MGLL, GPD2, ODC1, HSD17B4, S100A10, ECHS1, ACOX1
Down_Syndrome_Brain	0.149701	0.532322	0.287857	-0.224989	-1.12441	192	PRMT2, NR2F1, SON, SUMO3, ABLIM1, EPHA3, CTSB, APP, AKT3, GFPT2, THRA, TMEM50B, SYN3, CAPZB, TIAM1, MCM3AP, MED27, ATP2C2, CSK, PRR5, MYCN, SGCD, MAPK3, SNRPC, HMGN1, RAB7A
HALLMARK_PI3K_AKT_MTOR_SIGNALING	0.160116	0.532322	0.130106	0.359914	1.24112	47	ITPR2, THEM4, ACACA, ADCY2, PIK3R3, PPP2R1B, IRAK4, MKNK2, RALB, E2F1, NOD1, CAB39L, EIF4E, EGFR, MAPK9
Allen_Brain_Atlas_Developing_Human_Brain_Tissue_Gene_Expression_Profiles_by_RNAseq_Orbital_Frontal_Cortex	0.165069	0.532322	0.10673	0.244009	1.12373	520	CNIH3, CBLN2, CNTN4, CUBN, CREB3L2, GALNT2, DKK1, ADCY8, FNDC1, LSAMP, NPNT, PLA2R1, STK32B, KLHL14, TOX, EXOC6, ECT2L, PEG3, PET117, VSTM2L, TMCO4, SULF1, SOSTDC1, SYT4, MYADML2, GRP, SLC26A11, SCAF11, CPNE8, DSC2, FREM1, RNF19A, PLXNC1, MYO16, PTCH1, NAE1, PCDHA7, RNF130, PPCDC, NAALADL2, PHYH, B3GNTL1, DCTN1-AS1, TMEM62, CTHRC1, COCH, ATP8B1, GPT, PCDHA11, ZBTB20, RFX5, BRINP3, PROM1, CDH10, S…
HALLMARK_INFLAMMATORY_RESPONSE	0.182222	0.532322	0.122108	0.35818	1.21829	44	SLC4A4, PTGER4, ABCA1, ADORA2B, CD82, LYN, KCNMB2, RGS16, ITGB8, PDE4B, P2RX7, TPBG, CX3CL1, PTPRE, FZD5, SLC7A1, RASGRP1, DCBLD2, SCN1B, CHST2, SLC1A2
Allen_Brain_Atlas_Developing_Human_Brain_Tissue_Gene_Expression_Profiles_by_RNAseq_Primary_Motor_Cortex_Area.M1_Area.4	0.187075	0.532322	0.102822	0.255222	1.13371	302	CNTN4, DKK1, SEMA3C, B3GALT5, NPNT, STK32B, IGSF6, HAS3, SLC7A7, KLHL14, EXOC6, MEG3, SOSTDC1, GRP, SLC26A11, SLC47A1, IGSF9B, USH2A, MYO16, PTCH1, PCDHA7, RNF130, ZNF621, PPCDC, CMTM2, TMEM62, CTHRC1, AREL1, COCH, TARBP1, GPT, RGL4, PCDHA11, ZBTB20, PROM1, PXDNL, FGGY, MST1R, ABCC9, PCID2, OXNAD1, SLN, PCDHA9, AGAP1, SLC8A3, MPRIP, PKD1L1, GBE1, CLDN4, HIPK2, LRRD1, NTN4, TBC1D2, CCDC3, DGKH, LI…
HALLMARK_ESTROGEN_RESPONSE_LATE	0.192913	0.532322	0.202072	-0.262929	-1.14356	81	SLC9A3R1, CHST8, FKBP4, NCOR2, SLC29A1, ALDH3A2, TIAM1, MDK, JAK1, SEMA3B, FLNB, CCND1, LLGL2, MEST, HOMER2, BLVRB, DNAJC12, ARL3, CXCL12, ADD3, BCL2, TSTA3, GALE, FAM102A, CA12
HALLMARK_TNFA_SIGNALING_VIA_NFKB	0.19323	0.532322	0.114751	0.322107	1.18043	66	KLF9, F2RL1, EFNA1, PLK2, PTGER4, ABCA1, PANX1, BCL6, DUSP4, BMP2, NFAT5, B4GALT5, CLCF1, PDE4B, TNFAIP3, BIRC3, TANK, PTPRE, PMEPA1
Allen_Brain_Atlas_Developing_Human_Brain_Tissue_Gene_Expression_Profiles_by_RNAseq_Mediodorsal_Nucleus_Of_Thalamus	0.196118	0.532322	0.0937465	0.234221	1.09869	801	ADAMTS18, PCDH17, CBLN2, CNTN4, ALPK3, TNXB, TNR, FSCN2, TCERG1L, SLC25A13, AGO2, KIAA1755, MYO1B, COL6A3, TMEM200C, DRD2, KCNA1, ZEB2, SETD9, GRIN2B, KCNK4, SLC7A7, SLC5A2, ADAP2, MATN3, KCNB1, PET117, POPDC3, CNKSR3, PREX2, SULF1, SEMA6D, COLCA2, SLC26A11, SLC47A1, DIS3L, COL12A1, DCHS2, KCNQ5, BCL6, TG, FILIP1L, MFAP4, ADAMTS9, TMEM246, PCDHA7, RNF130, PTPRC, GALNT14, LMBR1, NTRK3, NAALADL2, A…
HALLMARK_OXIDATIVE_PHOSPHORYLATION	0.214744	0.562776	0.170932	-0.307122	-1.1681	45	LDHA, TIMM13, ECH1, GPX4, SLC25A4, CYB5R3, PHB2, POLR2F, NDUFS8, COX4I1, MRPS22, GLUD1, UQCRC1, NDUFS2, IDH2, ECHS1, NDUFB8, PDHX, POR, IDH3B, NDUFA7, ETFA, IDH3A
HALLMARK_HEME_METABOLISM	0.22619	0.573016	0.186433	-0.259412	-1.11747	75	RAP1GAP, NARF, CTSB, TMCC2, ADD1, PPP2R5B, SNCA, PIGQ, MKRN1, BLVRA, HEBP1, NR3C1, BLVRB, PRDX2, DMTN, P4HA2, SEC14L1
Allen_Brain_Atlas_Developing_Human_Brain_Tissue_Gene_Expression_Profiles_by_RNAseq_Cerebellar_Cortex	0.244813	0.600187	0.0822055	0.232301	1.08326	659	FILIP1, PCDH17, LACC1, DPF3, GALNT2, TNR, FAM184A, ADCY8, FPGT-TNNI3K, EBF3, NPNT, CHST3, STK32B, SLC25A45, ZIC5, GRIN2B, PLK2, B3GNT2, FZD4, LRP1B, MGAT5, GABRA5, ZIC1, SCUBE1, PET117, ACSL1, PTGER4, DZIP1, DHX40, TENM3, CALB1, SEMA6D, SMARCA2, ARHGEF15, ADAMTSL5, DIS3L, HTR7P1, CGNL1, TSPAN9, CPNE8, FREM1, FILIP1L, KCNK9, PLXNC1, NPAS3, PTCH1, PCDHA7, LMBR1, BTBD3, TRIM5, ALX4, PYGL, FGF5, AREL…
HALLMARK_COAGULATION	0.303681	0.721242	0.138022	-0.283931	-1.07914	43	CRIP2, CTSB, SIRT2, CFD, SH2B2, THBS1, CAPN2
HALLMARK_EPITHELIAL_MESENCHYMAL_TRANSITION	0.31586	0.72716	0.0824344	0.283743	1.08398	82	PMP22, DKK1, COL6A3, ADAM12, MATN3, TGFBI, COL12A1, CTHRC1, CDH6, COL1A2, FBLN2, FBN2, COL16A1, CDH11, SLIT3, TNFAIP3, BMP1, FBLN5, PMEPA1, DST, ELN, GPX7, MYLK, CRLF1, WNT5A, LAMA2, ITGB1, COL5A1, COL4A1, FSTL3, TGFBR3, SERPINE2
HALLMARK_NOTCH_SIGNALING	0.327456	0.72716	0.118288	-0.365041	-1.08752	17	KAT2A, CUL1, CCND1
HALLMARK_INTERFERON_ALPHA_RESPONSE	0.334877	0.72716	0.086795	0.349701	1.08691	27	UBA7, ELF1, TRIM5, SP110, WARS, LPAR6, IL7, HELZ2
Intellectual_Disability_text_mining	0.357068	0.753086	0.0635008	0.224241	1.03925	575	FILIP1, PCDH17, ASTN2, GRIK2, PCDH10, CNTN4, KLF9, NRXN3, AGO2, MYO1B, STK32B, SHOC2, ZEB2, ZIC5, KCNJ6, GRIN2B, LRP1B, CNTNAP2, GABRA5, ZIC1, SLC4A10, ADAP2, ATP10A, SLC4A4, AMPH, ZADH2, GRM5, NRCAM, ZBTB7C, SACS, CALB1, SEMA3A, SMARCA2, VGLL3, PDE4D, PRKD1, LEMD3, TSPAN9, NPAS4, SLC4A8, KCNK9, UBE3A, NPAS3, KANK1, CNNM2, PTCH1, RCAN2, NAALADL2, AUTS2, ALX4, ATP8A2, DYNC1H1, CACNA1A, NPTX2, PLCL…
HALLMARK_KRAS_SIGNALING_UP	0.374667	0.753086	0.0730744	0.276071	1.0414	75	SPARCL1, F2RL1, PEG3, BTBD3, RGS16, BMP2, IKZF1, EPHB2, ABCB1, CPE, SPRY2, LCP1, TNFAIP3, BIRC3, CAB39L, GPRC5B, WDR33, MAP3K1, DNMBP, HDAC9, STRN, FLT4, ZNF277, PTPRR, ADAM17, DCBLD2, SCN1B, PLAT
HALLMARK_DNA_REPAIR	0.376543	0.753086	0.122679	-0.276598	-1.04327	41	STX3, DDB2, GMPR2, GPX4, LIG1, RFC3, POLR2F, POLE4, TAF12, ADRM1, SNAPC4, NME4, ERCC1
HALLMARK_REACTIVE_OXYGEN_SPECIES_PATHWAY	0.398396	0.754321	0.10925	-0.327941	-1.05074	22	SOD1, CDKN2D, MSRA, GPX4, PRDX2, LAMTOR5, PFKP, TXNRD2
Alzheimers_Disease_CNS_Brain_Hippocampus	0.402439	0.754321	0.172324	-0.201144	-1.01026	197	NDUFA10, SF3B5, CTSB, ATF4, STX1A, ZC3H3, AKT3, ADD1, PLD2, GRIP2, PTOV1, CLIP3, MCM3AP, PDLIM7, VRK3, RANBP3, TRAK1, GNAS, RHOBTB1, LARP4B, MYCN, DET1, MAN2A2, PCGF2, ECH1, GPX4, PLXNB2, SERBP1, POLR3E, SMARCC2, IFNGR2, SORL1, CRELD1, DRG1, GNAZ, FLOT1, FSCN1, MANSC1, PIP5K1A, B4GALT2, PTPRF, ZFP64, CALM2, TCF4, DTX3, TBC1D8, CTBP1, TLE2, KLHL22, SYNJ1, HMGXB3, NCOA2, HPS4, TMED3, CREBBP, YIF1A,…
HALLMARK_UV_RESPONSE_UP	0.413333	0.754321	0.121543	-0.243756	-1.0101	63	LHX2, DLG4, IGFBP2, FKBP4, MAPK8IP2, CNP, HSPA13, SLC25A4, STIP1, NPTXR, SQSTM1, EPHX1
Down_Syndrome_Fetus	0.421429	0.754321	0.0617054	0.237615	1.01822	198	PMP22, MYO1B, KCNK4, NCOA5, SYT4, INPP4B, KRT8, UBE3A, VAX1, RCAN2, TEAD4, GALNT14, ABCG5, CYGB, TMEM62, CTHRC1, ADHFE1, SP110, CDH6, RFX5, CP, CDH10, ANK3, CEP192, NEUROD1, EXOC2, SLC8A3, SLCO3A1, ZBTB8OS, RTN4RL1, CLDN4, ARPC1B, TH, UCP2, MSH2, BTBD9, PDE4B, RASA2, ZNF354A, USP8, SLC30A10, MAP3K1, ADAM19, SPEN, PRRC2B, LINGO3, MGAT3, LIMCH1, PIP4K2B, EGLN3
Intellectual_Disability	0.437008	0.754321	0.129443	-0.231007	-1.00472	81	KIRREL3, AHDC1, SYNGAP1, ACTG1, CEP135, ALDH3A2, PACS1, PTDSS1, CRADD, TECR, FOXP1, MEF2C, GRIN1, CTNNB1, TBC1D24, STXBP1, DYRK1A, TCF4, CEP152, MCPH1, ANKRD11
HALLMARK_APICAL_JUNCTION	0.439516	0.754321	0.130777	-0.225042	-0.998914	88	EXOC4, ACTG1, AKT3, CDH3, SPEG, BAIAP2, HRAS, MYL12B, AKT2, MDK, JUP, NLGN2, ATP1A3, CD34, GNAI2, CD276, PFN1, NRXN2, FSCN1, ACTN1, PBX2, STX4, CERCAM, VAV2, PKD1, LAMB3, SHC1, ICAM5, CLDN18, PLCG1, GAMT, RSU1, DHX16, INSIG1, EVL
HALLMARK_UV_RESPONSE_DN	0.44837	0.754321	0.0650878	0.267406	1.00127	73	PMP22, AMPH, PIK3R3, ADORA2B, INPP4B, CACNA1A, COL1A2, APBB2, KALRN, SIPA1L1, PTPRM, IGF1R, RASA2, SCN8A, FBLN5, TJP1, FYN, SLC7A1, DLC1, PRKCE, KCNMA1, ATXN1, TGFBR3, CDK13, ANXA2, LPAR1, RND3, COL11A1
HALLMARK_WNT_BETA_CATENIN_SIGNALING	0.459948	0.754321	0.0982123	-0.316939	-1.01224	21	KAT2A, NCOR2, CSNK1E, CUL1, CTNNB1, CCND2, NUMB
HALLMARK_ADIPOGENESIS	0.466488	0.754321	0.0625237	0.258003	0.9947	87	SPARCL1, MARC2, FZD4, ABCA1, ENPP2, MAP4K3, BCL6, PHYH, PQLC3, ITIH5, GBE1, UCP2, ACADM, CAT, PTGER3, APLP2, TANK, EPHX2
HALLMARK_PROTEIN_SECRETION	0.540845	0.815878	0.0937465	-0.286586	-0.941633	24	SOD1, BNIP3, TPD52, GNAS
HALLMARK_UNFOLDED_PROTEIN_RESPONSE	0.552553	0.815878	0.0962406	-0.257065	-0.939395	37	VEGFA, ATF4, ZBTB17, EXOSC2, CHAC1
HALLMARK_IL6_JAK_STAT3_SIGNALING	0.55493	0.815878	0.0922597	-0.294837	-0.952873	23	TNFRSF1A, CNTFR, STAT3, TYK2, IFNGR2
HALLMARK_TGF_BETA_SIGNALING	0.592068	0.815878	0.0888945	-0.278111	-0.921495	25	NCOR2, SKI, THBS1, IFNGR2, PPP1CA, CTNNB1
HALLMARK_PEROXISOME	0.59633	0.815878	0.0928481	-0.243709	-0.929294	44	DLG4, SOD1, HRAS, TSPO, ECH1, SLC25A4, HMGCL, ABCB9, PEX14, CTBP1, HSD17B4, FIS1, ERCC1, IDH2, ABCC8
HALLMARK_P53_PATHWAY	0.597744	0.815878	0.105125	-0.220806	-0.947405	73	PRMT2, APP, NDRG1, BAIAP2, HRAS, DDB2, FDXR, RAD9A, PLXNB2, EPHX1, IER3, MXD4, RXRA, SPHK1, CCND2, RPL36, RAD51C, ZNF365, CCND3, RNF19B
HALLMARK_SPERMATOGENESIS	0.60303	0.815878	0.0561767	0.286406	0.908421	30	CLGN, NOS1, MTOR, STRBP, PACRG, AURKA, PIAS2, OAZ3
HALLMARK_ALLOGRAFT_REJECTION	0.619186	0.815878	0.0530213	0.266737	0.908694	42	IGSF6, ST8SIA4, LYN, PTPRC, HLA-DMA, WARS, PSMB10, BRCA1, CD8B, CARTPT, IL7, EGFR, BCAT1, HDAC9, IL16, PRKCB
HALLMARK_HYPOXIA	0.624521	0.815878	0.103576	-0.210686	-0.928406	83	VEGFA, LDHA, NDRG1, RORA, BHLHE40, TPD52, PFKFB3, NR3C1, GPC1, GAPDH, HDLBP, P4HA2, IER3, CXCR4, PFKP, MAFF, BCL2, HK1, INHA, PLAUR, DPYSL4, CA12, CDKN1C, TGFB3, EFNA3
HALLMARK_KRAS_SIGNALING_DN	0.63467	0.815878	0.0512184	0.251633	0.892794	54	SIDT1, RYR1, TG, NOS1, PTPRJ, COL2A1, FGGY, P2RX6
HALLMARK_E2F_TARGETS	0.641026	0.815878	0.0913924	-0.231224	-0.915782	52	STMN1, SLBP, DCTPP1, POLD2, HMGA1, CCNB2, LIG1, RFC3, SMC4, DNMT1, RAD51C, POLE4, SPAG5, ILF3, MCM7
HALLMARK_IL2_STAT5_SIGNALING	0.644444	0.815878	0.0995791	-0.213946	-0.91754	72	NDRG1, MYO1E, RORA, BHLHE40, TIAM1, CYFIP1, AGER, GPX4, PLEC, P2RX4, ST3GAL4, ETV4, MYO1C, RNH1, MAFF, CCND2, BCL2, CCND3, CDKN1C, GLIPR2
Allen_Brain_Atlas_Developing_Human_Brain_Tissue_Gene_Expression_Profiles_by_RNAseq_Primary_Auditory_Cortex.Core	0.645833	0.815878	0.17822	-0.178743	-0.953216	357	NTNG2, NDUFV3, EML6, IL27RA, RABL6, LPL, MRPS6, ATF4, SYBU, BOC, CAMKV, CDH3, PPP1R13L, NCOR2, SLBP, CAPN1, SERINC5, TSPO, ZDHHC11, SLC2A4RG, AKT2, RHOBTB1, LARP4B, INHBA, RECQL5, SCNN1D, LZTS2, LRRN3, TRPC4, PACS1, FAM81A, CHAC1, KIF1C, KREMEN2, CRADD, THBS1, FOXP1, PIN1, MEF2C, MRPS2, ST6GAL2, SLC35C1, PAXBP1-AS1, SMTNL2, BTNL9, RTN1, VOPP1, DCBLD1, PREX1, DGKQ, CRYBB2P1, SERTAD2, GNAO1, CCDC18…
HALLMARK_G2M_CHECKPOINT	0.658046	0.815878	0.0496901	0.247131	0.88669	58	LBR, BIRC5, PRIM2, RASAL2, CDC6, ODF2, TLE3, SRSF10, AURKA, E2F1, PAFAH1B1, GINS2, KIF11, SLC7A5, SLC7A1, BUB3, ORC5
Allen_Brain_Atlas_Developing_Human_Brain_Tissue_Gene_Expression_Profiles_by_RNAseq_CTD.Gene_Disease.Associations_ID	0.665584	0.815878	0.0899861	-0.221597	-0.907065	57	SYNGAP1, RABL6, KDM6B, COL18A1, CACNA1G, GNAS, CAPN10, MEF2C
HALLMARK_ESTROGEN_RESPONSE_EARLY	0.679167	0.819312	0.103576	-0.204291	-0.913727	92	ABLIM1, SLC9A3R1, TUBB2B, FKBP4, SYBU, BHLHE40, NCOR2, TIAM1, SEMA3B, FLNB, RARA, CCND1, SLC37A1, BLVRB, AKAP1, CELSR1, ARL3, CXCL12, KDM4B, ADD3, BCL2
HALLMARK_GLYCOLYSIS	0.712598	0.846211	0.0972151	-0.20473	-0.890432	81	VEGFA, NDUFV3, LDHA, SOD1, FKBP4, STMN1, PKM, GPC1, HDLBP, P4HA2, B3GAT3, IER3, CXCR4, PFKP, B4GALT2, TSTA3, GALE, PLOD1, DPYSL4
HALLMARK_HEDGEHOG_SIGNALING	0.731458	0.855243	0.0721798	-0.26324	-0.812653	19	VEGFA, TLE1, CNTFR, RTN1, CELSR1
HALLMARK_BILE_ACID_METABOLISM	0.780236	0.898454	0.0431037	0.239893	0.808789	41	ACSL1, ABCA1, EFHC1, PHYH, RBP1, CAT, SLC23A1, EPHX2, PEX11G, LONP2, PIPOX, BCAR3, ABCG4, ATXN1, CYP46A1, LIPE, SLC23A2
Allen_Brain_Atlas_Developing_Human_Brain_Tissue_Gene_Expression_Profiles_by_RNAseq_amygdaloid_complex	0.794872	0.901646	0.0246382	0.194338	0.913263	897	HSPA12A, PCDH17, CNIH3, CLSTN2, AJAP1, LACC1, ASTN2, GRIK2, CNTN4, FBXW7, RAB4B, TCERG1L, MARC2, HS6ST3, SULF2, TMEM232, CHST3, TRIM9, F2RL1, KCNA1, HAPLN1, ARL4C, GRIN2B, B3GNT2, KCNK4, SLC7A7, LRP1B, TXNRD1, ECT2L, KCNB1, ZADH2, PET117, MATN1, GRM5, NCOA5, SLC35F3, VSTM2L, FHDC1, DHX40, SOSTDC1, MAGI3, MYADML2, ADAMTSL5, SPTB, VGLL3, COL12A1, IGSF9B, PRKD1, ST3GAL5, OXCT1, KCNQ5, SGPL1, BCL6, U…
HALLMARK_ANDROGEN_RESPONSE	0.837037	0.935512	0.0400846	0.227613	0.774189	44	INPP4B, KRT8, CAMKK2, SLC38A2, HERC3, ELL2, HMGCR, ARID5B, PMEPA1, SPCS3
HALLMARK_MTORC1_SIGNALING	0.868195	0.956273	0.036839	0.21095	0.753935	56	ACACA, TXNRD1, PIK3R3, FKBP2, WARS, GBE1, HMGCR, AURKA, CD9, SLC7A5, EGLN3, BCAT1, ELOVL5, UCHL5
Allen_Brain_Atlas_Developing_Human_Brain_Tissue_Gene_Expression_Profiles_by_RNAseq_Posterior.Caudal_Superior_Temporal_Cortex_Area.22c	0.884783	0.960621	0.0218679	0.186199	0.848798	465	ITPR2, TNXB, TNR, DKK1, DDR2, AGO2, HS6ST3, LSAMP, IGSF6, ADAP2, PEG3, KCNB1, PET117, MTUS1, NOS3, KY, CNKSR3, PREX2, SOSTDC1, INPP4B, GRP, ZCWPW2, IGSF9B, SHC3, SCAF11, FREM1, PITPNC1, PTPRJ, PPP2R1B, ACTL10, PCDHA7, RNF130, GREB1, ZNF621, NAALADL2, ADRA1A, NAALADL1, RGS16, CTHRC1, PCDHA11, PAPPA, PDE1C, SIK2, RFX5, ILDR2, VPS13D, ZNF426, MEGF11, IRAK4, NR2C2, ZNF469, CAMTA1, CAPS2, MED12L, PCDH…
Allen_Brain_Atlas_Developing_Human_Brain_Tissue_Gene_Expression_Profiles_by_RNAseq_Hippocampus_Hippocampal_Formation	0.897436	0.960636	0.24134	-0.164671	-0.912459	607	ADARB1, CSAD, FBRSL1, TNK2, RASSF7, HSF2BP, LAMA5, PCNT, ULK1, SSBP4, SEZ6L, RABL6, MRPS6, COL9A2, MIB2, GMEB2, CDCA7, DMPK, GNB3, PDIA2, NCOR2, SPEG, ETV1, TMEM120B, BAIAP2, SYN3, ASAH1, LY6H, ZBTB17, SLBP, CAPZB, ATIC, ALDH3A2, DYDC2, SETD1A, CDK10, SPIRE2, TMTC4, KLC4, ZDHHC11, SPTBN4, CYFIP1, CBX4, UVSSA, INHBA, RECQL5, SCNN1D, LZTS2, MED15, LRRN3, MAN2A2, JAK1, CAPN10, RBFOX3, SEMA3B, KIF1C,…
Abnormality_Of_Neuronal_Migration	0.958453	0.99511	0.0321428	0.18454	0.654747	54	GDF6, DYNC1H1, OCLN, ARFGEF2, POMGNT1, NDE1, PDGFB, CRB1, FKRP, PAFAH1B1, POMT2, RMND1, PEX10, FTO, ZNF423, LAMA2, COL4A1, GRIP1, KIF5C, KAT6B
HALLMARK_COMPLEMENT	0.969014	0.99511	0.0307753	0.184171	0.676297	67	LYN, F7, CP, DOCK10, PDGFB, DGKH, TNFAIP3, LIPA, USP8, HPCAL4, FYN, PRCP, DOCK4, PREP, SPOCK2, VCPIP1, DPP4, RASGRP1, PLAT, ZFPM2, MT3, CDH13, ME1, IRF2, F3, XPNPEP1, SRC, DOCK9
HALLMARK_PANCREAS_BETA_CELLS	0.97555	0.99511	0.0560596	-0.208389	-0.576922	13	AKT3, STXBP1
Allen_Brain_Atlas_Developing_Human_Brain_Tissue_Gene_Expression_Profiles_by_RNAseq_Inferolateral_Temporal_Cortex_Area.Tev_Area.20	0.991081	0.99511	0.0161937	0.163101	0.73122	339	ADAMTS14, AMPD3, MAPKAPK3, ABHD1, PEG3, KY, PREX2, TMCO4, SOSTDC1, SYT4, RUNX2, IGSF9B, SCAF11, NAV3, TSPAN9, RNF19A, PLXNC1, MYO16, PCDHA7, HLA-DMA, PPCDC, RGS16, FERMT3, AREL1, SP110, GPT, RINL, PCDHA11, RFX5, FGGY, MEGF11, ZNF469, PKP2, OXNAD1, PCDHA9, SLC8A3, PIK3AP1, PELO, BRCA1, COL16A1, ERMAP, ACADM, HMGCR, EFNB3, SARM1, PCDHAC2, E2F1, CACNA2D1, NOD1, TFB1M, TMEM102
HALLMARK_MYC_TARGETS_V2	0.99511	0.99511	0.0551352	-0.17809	-0.49304	13	DCTPP1, SLC19A1, TCOF1

## Sheet: GSE_overlap DMR-DEG
pathway	pval	padj	log2err	ES	NES	size	Gene_Name
Down_Syndrome_text_mining	0.00102473	0.0778796	0.45506	-0.296947	-1.50818	218	PRMT2, PDE9A, POFUT2, NDUFV3, PDXK, SUMO3, GABPA, JAM2, OTUB1, CTSB, PCNT, APP, MORC3, CHAF1B, SOD1, UNC5A, ACTG1, TTC3, NCK2, COL18A1, ITSN1, JAK3, TMEM50B, HRAS, TIAM1, MCM3AP, HSPA13, CXADR, PTTG1IP, RRP1B, CCT8, JAK1, PFKM, NLGN2, CRADD, CD34, GPX4, HMGN1, VAC14, SETD4, EDNRB, RTN1, IFNGR2, PHB2, GLIS2, EIF3F, GAPDH, PIGP, CRELD1, CORO7, MAP4, WRB, RBM11, PFKP, IFNAR2, DYRK1A, SIM2, GART, GAB…
Allen_Brain_Atlas_Developing_Human_Brain_Tissue_Gene_Expression_Profiles_by_RNAseq_Anterior.Rostral_Cingulate.Medial_Prefrontal_Cortex	0.00493795	0.156624	0.407018	0.309816	1.39619	363	FAM110C, PCDH17, CBLN2, FNIP2, TIGD6, ZNF114, SEMA3C, FNDC1, ACACA, STK32B, MDH1B, PTPRO, ABHD1, EXOC6, PET117, MATN1, GRM5, VSTM2L, MDGA1, SULF1, SOSTDC1, SYT4, GRP, SMARCA2, CSMD3, GAS2, SLC26A11, DIS3L, IGSF9B, NAV3, CPNE8, DSC2, PLXNC1, MYO16, PCDHA7, SDK2, PPCDC, DCTN1-AS1, TMEM62, COCH, PCDHA11, PAPPA, CCDC144A, CRIM1, PROM1, APBB2, IMMP1L, VKORC1, WWP2, CDH10, B4GALT5, SLC37A3, PCDHA9, SH3…
Allen_Brain_Atlas_Developing_Human_Brain_Tissue_Gene_Expression_Profiles_by_RNAseq_Ventrolateral_Prefrontal_Cortex	0.00618254	0.156624	0.407018	0.303004	1.36749	375	FAM110C, CNIH3, CBLN2, FNIP2, CNTN4, GALNT2, DKK1, ADCY8, FPGT-TNNI3K, FNDC1, COL6A3, NPNT, ADAM12, TMEM200C, STK32B, SLC7A7, KLHL14, EXOC6, PEG3, MTUS1, VSTM2L, SULF1, SOSTDC1, SYT4, SDK1, GRP, SLC9A2, SLC26A11, IGSF9B, SCAF11, CPNE8, DSC2, ADAMTS9-AS2, RNF19A, MYO16, ADAMTS9, PTCH1, PCDHA7, RNF130, ALX4, PHYH, IMPA2, TMEM62, COCH, GPT, PCDHA11, COL1A2, RFX5, PROM1, FGGY, WWP2, CDH10, SLC16A5, M…
Down_Syndrome	0.0130921	0.212748	0.38073	-0.256001	-1.29971	227	VEGFA, ANKS1B, PDXK, LAMA5, CTSB, APP, SLC9A3R1, CHAF1B, SOD1, GSTP1, TTC3, NDRG1, STMN1, ITSN1, JAK3, GPSM1, NCOR2, THRA, MAGI2, DRD4, AKT2, HMGB1, WDR46, PRR5, MYCN, TNFRSF1A, SNCA, MITF, PCGF2, AGER, SMG6, JAK1, STAT3, MAPK3, NPHS1, MAD2L2, SLC45A3, THBS1, PIN1, CCND1, EDNRB, SORL1, SGTA, CTNNB1, PIGP, CRELD1, PRDX2, PFN1, SLC39A4, LIMK1, MEN1, DYRK1A, HLA-A, SIM2, TRADD, SPHK1, AKT1, GART, NF…
HALLMARK_MYC_TARGETS_V1	0.0153883	0.212748	0.38073	-0.395504	-1.54511	48	LDHA, PSMD8, EIF4H, POLD2, CUL1, LSM7, SERBP1, LSM2, SNRPG, PHB2, RPS3, PABPC4, ACP1, MCM7, YWHAE, ODC1, YWHAQ, MRPL23, SF3A1
Allen_Brain_Atlas_Developing_Human_Brain_Tissue_Gene_Expression_Profiles_by_RNAseq_Striatum_24	0.0167959	0.212748	0.352488	0.280441	1.27978	474	FAM110C, PCDH10, KCNA5, FBXW7, RAB4B, ROBO1, MYO1B, NUF2, MSRB3, F2RL1, DRD2, ARL4C, FZD4, DYSF, PDE10A, CNTNAP2, KLHL14, ADAP2, DACT2, PREX2, RASSF3, MDGA1, PTGER4, CLGN, SOSTDC1, OLFML2B, GTSE1, TENM3, SACS, GRP, LAMP5, RUNX2, DIS3L, SMOC2, COL12A1, HTR7P1, CGNL1, DCHS2, EPN3, TSPAN9, BIRC5, NOS1, KAZALD1, FREM1, FILIP1L, ADAMTS9-AS2, ADORA2A, TMEM192, EFHC1, KCNK9, PLXNC1, ARRDC2, LMBR1, MGST2…
Allen_Brain_Atlas_Developing_Human_Brain_Tissue_Gene_Expression_Profiles_by_RNAseq_Primary_Visual_Cortex_Striate_Cortex_AreaV1.17	0.023895	0.259431	0.352488	0.306142	1.34124	252	PCDH17, AJAP1, GRIK2, DPF3, TCERG1L, TMEM232, LSAMP, STK32B, KCNA1, MDH1B, SETD9, LRP1B, PDE8A, PEG3, MTUS1, ZBTB7C, INPP4B, MYADML2, ADAMTSL5, TMEM56, ZCWPW2, IGSF9B, ST3GAL5, USH2A, NOS1, RNF19A, PTPRJ, BTBD3, PPCDC, PHYH, RGS16, BRINP1, PAPPA, ZBTB20, PLCXD3, DERA, IMMP1L, F7, B4GALT5, BTD, OXNAD1, MYO7A, PLXNA2, PIK3AP1, ADCY1, SGMS1, PDE7B, TMEM132E, ACADM, RALB, MGST1, DGKH, SV2C, SLC6A7, L…
HALLMARK_CHOLESTEROL_HOMEOSTASIS	0.0290015	0.262939	0.352488	-0.494662	-1.58493	22	LPL, ACTG1, LSS, STX5, ECH1, SEMA3B, CTNNB1, ABCA2, MAL2, PLAUR, CBS
HALLMARK_ANGIOGENESIS	0.0311375	0.262939	0.352488	-0.650361	-1.65585	10	VEGFA, APP, LPL
Allen_Brain_Atlas_Developing_Human_Brain_Tissue_Gene_Expression_Profiles_by_RNAseq_Primary_Somatosensory_Cortex_Area.S1_Areas3.1.2	0.0402259	0.305717	0.321776	-0.220971	-1.16974	346	EXPH5, CRIP2, NDUFV3, EML6, SYNGAP1, STX3, EXOC4, IL27RA, SEZ6L, LPL, CHST8, ATF4, MMP17, SYBU, BOC, CAMKV, DLGAP4, CACNG7, CREB5, CDH3, PPP1R13L, ISYNA1, MAST1, IGSF21, CLIP3, SLBP, ARHGAP33, CAPN1, COMTD1, TSPO, SEMA7A, RHOBTB1, LARP4B, INHBA, RECQL5, CELF3, LRRN3, PACS1, FAM81A, THBS1, RNF149, FOXP1, MEF2C, VAC14, MRPS2, SLC35C1, SMTNL2, RTN1, TUB, VOPP1, LRRC73, SERTAD2, P2RX4, GNAO1, DALRD3,…
HALLMARK_XENOBIOTIC_METABOLISM	0.0506072	0.34965	0.321776	-0.334272	-1.36735	58	CSAD, RAP1GAP, NDRG2, JUP, TNFRSF1A, ABHD6, ECH1, LONP1, ACOX3, BLVRB, EPHX1, TGFB2, SPINT2, GART, PYCR1, ACP1
HALLMARK_MYOGENESIS	0.0605257	0.354433	0.321776	-0.297756	-1.33102	91	EFS, ABLIM1, APP, AEBP1, CAMK2B, DMPK, BHLHE40, SPEG, DAPK2, SIRT2, PDLIM7, AKT2, CFD, SGCD, PFKM, PTP4A3, MAPRE3, MEF2C, PLXNB2, CHRNB1
HALLMARK_APICAL_SURFACE	0.0652866	0.354433	0.222056	0.48583	1.42979	22	SULF2, SCUBE1, MDGA1, LYN, CD160, ATP8B1, RTN4RL1, BRCA1, CX3CL1, AKAP7, TMEM8B
HALLMARK_MITOTIC_SPINDLE	0.0652903	0.354433	0.287805	-0.297068	-1.3099	85	EZR, PCNT, NCK2, ITSN1, MYO1E, KLC1, CAPZB, TIAM1, CYTH2, WASF2, FLNB, CCNB2, CLIP2, MARK4, NUMA1, SMC4, PREX1, ARHGEF2, RALBP1, FSCN1, ARHGAP27, SUN2, CNTROB, SORBS2, SYNPO, YWHAE, FGD6
Allen_Brain_Atlas_Developing_Human_Brain_Tissue_Gene_Expression_Profiles_by_RNAseq_Dorsolateral_Prefrontal_Cortex	0.0743169	0.364037	0.169571	0.269399	1.22169	402	CBLN2, FNIP2, TIGD6, CNTN4, GALNT2, DKK1, ADCY8, SEMA3C, FNDC1, ACACA, COL6A3, NPNT, TMEM200C, STK32B, DRD2, PTPRO, KLHL14, EXOC6, PEG3, VSTM2L, SULF1, SOSTDC1, SYT4, SDK1, GRP, CSMD3, PDE4D, IGSF9B, NAV3, USH2A, CPNE8, DSC2, FREM1, RNF19A, MYO16, ADAMTS9, PTCH1, PCDHA7, PPCDC, NAALADL2, DCTN1-AS1, TMEM62, CTHRC1, COCH, BMP2, ATP8B1, ADHFE1, GPT, PCDHA11, RFX5, PROM1, APBB2, PDSS1, TEC, WWP2, B4G…
Down_Syndrome_CNS_Brain_Cerebellum	0.0766393	0.364037	0.287805	-0.233546	-1.17329	203	NDUFV3, SON, SOD1, RALY, SMARCD1, ACIN1, ITSN1, DMPK, YTHDF1, TIMM13, PDLIM7, COMTD1, PCBP4, RABGGTB, CUL1, CORO1A, CAPN10, DDX6, HMGN1, RAB7A, SLC25A4, AKR1B1, SLC25A39, MRPS2, PLXNB2, GAPDH, GNAI2, SQSTM1, STK11IP, DTNB, NEDD8, PAPSS1, LIMK1, COX4I1, IFNAR2, CXCL12, DYRK1A, GART, IFT27, TSTA3, USP7, CLK3, COQ10A, PBX2, CCND3, DPYSL4, ACP1, LIMD1, NUBP1, UNC45A, ITPK1, HSD17B4, YWHAQ, PAM16, DNP…
HALLMARK_INTERFERON_GAMMA_RESPONSE	0.0945559	0.411911	0.172324	0.368487	1.30739	54	OAS3, ST8SIA4, ST3GAL5, HLA-DMA, AUTS2, SP110, WARS, PSMB10, UPP1, NLRC5, ARID5B, PDE4B, TNFAIP3, NOD1, IL7, HELZ2
HALLMARK_APOPTOSIS	0.101974	0.411911	0.257206	-0.313774	-1.26985	56	APP, SOD1, FEZ1, ADD1, FDXR, TSPO, PPP2R5B, GPX4, RARA, CCND1, CTNNB1, SQSTM1, TGFB2, IER3, CCND2
Neuronal_System	0.102978	0.411911	0.152145	0.30248	1.24183	139	GRIK2, KCNA5, GRIK3, ADCY8, KCNA1, KCNJ6, GRIN2B, KCNK4, GABRA5, KCNB1, ADCY2, PANX1, KCNQ5, CHRNA2, KCNK9, CACNG2, KCNMB2, CACNA1A, KCNAB1, CACNA1E, KCNA4, GABRB3, ABCC9, ADCY1, SLC38A2, KCNC1, CACNB4, GNG7, KCNN3
HALLMARK_FATTY_ACID_METABOLISM	0.137615	0.522936	0.2114	-0.322986	-1.23159	44	LDHA, ALDH3A2, AUH, ECH1, BLVRA, HMGCL, EPHX1, NTHL1, HIBCH, REEP6, MGLL, GPD2, ODC1, HSD17B4, S100A10, ECHS1, ACOX1
Down_Syndrome_Brain	0.149701	0.532322	0.287857	-0.224989	-1.12441	192	PRMT2, NR2F1, SON, SUMO3, ABLIM1, EPHA3, CTSB, APP, AKT3, GFPT2, THRA, TMEM50B, SYN3, CAPZB, TIAM1, MCM3AP, MED27, ATP2C2, CSK, PRR5, MYCN, SGCD, MAPK3, SNRPC, HMGN1, RAB7A
HALLMARK_PI3K_AKT_MTOR_SIGNALING	0.160116	0.532322	0.130106	0.359914	1.24112	47	ITPR2, THEM4, ACACA, ADCY2, PIK3R3, PPP2R1B, IRAK4, MKNK2, RALB, E2F1, NOD1, CAB39L, EIF4E, EGFR, MAPK9
Allen_Brain_Atlas_Developing_Human_Brain_Tissue_Gene_Expression_Profiles_by_RNAseq_Orbital_Frontal_Cortex	0.165069	0.532322	0.10673	0.244009	1.12373	520	CNIH3, CBLN2, CNTN4, CUBN, CREB3L2, GALNT2, DKK1, ADCY8, FNDC1, LSAMP, NPNT, PLA2R1, STK32B, KLHL14, TOX, EXOC6, ECT2L, PEG3, PET117, VSTM2L, TMCO4, SULF1, SOSTDC1, SYT4, MYADML2, GRP, SLC26A11, SCAF11, CPNE8, DSC2, FREM1, RNF19A, PLXNC1, MYO16, PTCH1, NAE1, PCDHA7, RNF130, PPCDC, NAALADL2, PHYH, B3GNTL1, DCTN1-AS1, TMEM62, CTHRC1, COCH, ATP8B1, GPT, PCDHA11, ZBTB20, RFX5, BRINP3, PROM1, CDH10, S…
HALLMARK_INFLAMMATORY_RESPONSE	0.182222	0.532322	0.122108	0.35818	1.21829	44	SLC4A4, PTGER4, ABCA1, ADORA2B, CD82, LYN, KCNMB2, RGS16, ITGB8, PDE4B, P2RX7, TPBG, CX3CL1, PTPRE, FZD5, SLC7A1, RASGRP1, DCBLD2, SCN1B, CHST2, SLC1A2
Allen_Brain_Atlas_Developing_Human_Brain_Tissue_Gene_Expression_Profiles_by_RNAseq_Primary_Motor_Cortex_Area.M1_Area.4	0.187075	0.532322	0.102822	0.255222	1.13371	302	CNTN4, DKK1, SEMA3C, B3GALT5, NPNT, STK32B, IGSF6, HAS3, SLC7A7, KLHL14, EXOC6, MEG3, SOSTDC1, GRP, SLC26A11, SLC47A1, IGSF9B, USH2A, MYO16, PTCH1, PCDHA7, RNF130, ZNF621, PPCDC, CMTM2, TMEM62, CTHRC1, AREL1, COCH, TARBP1, GPT, RGL4, PCDHA11, ZBTB20, PROM1, PXDNL, FGGY, MST1R, ABCC9, PCID2, OXNAD1, SLN, PCDHA9, AGAP1, SLC8A3, MPRIP, PKD1L1, GBE1, CLDN4, HIPK2, LRRD1, NTN4, TBC1D2, CCDC3, DGKH, LI…
HALLMARK_ESTROGEN_RESPONSE_LATE	0.192913	0.532322	0.202072	-0.262929	-1.14356	81	SLC9A3R1, CHST8, FKBP4, NCOR2, SLC29A1, ALDH3A2, TIAM1, MDK, JAK1, SEMA3B, FLNB, CCND1, LLGL2, MEST, HOMER2, BLVRB, DNAJC12, ARL3, CXCL12, ADD3, BCL2, TSTA3, GALE, FAM102A, CA12
HALLMARK_TNFA_SIGNALING_VIA_NFKB	0.19323	0.532322	0.114751	0.322107	1.18043	66	KLF9, F2RL1, EFNA1, PLK2, PTGER4, ABCA1, PANX1, BCL6, DUSP4, BMP2, NFAT5, B4GALT5, CLCF1, PDE4B, TNFAIP3, BIRC3, TANK, PTPRE, PMEPA1
Allen_Brain_Atlas_Developing_Human_Brain_Tissue_Gene_Expression_Profiles_by_RNAseq_Mediodorsal_Nucleus_Of_Thalamus	0.196118	0.532322	0.0937465	0.234221	1.09869	801	ADAMTS18, PCDH17, CBLN2, CNTN4, ALPK3, TNXB, TNR, FSCN2, TCERG1L, SLC25A13, AGO2, KIAA1755, MYO1B, COL6A3, TMEM200C, DRD2, KCNA1, ZEB2, SETD9, GRIN2B, KCNK4, SLC7A7, SLC5A2, ADAP2, MATN3, KCNB1, PET117, POPDC3, CNKSR3, PREX2, SULF1, SEMA6D, COLCA2, SLC26A11, SLC47A1, DIS3L, COL12A1, DCHS2, KCNQ5, BCL6, TG, FILIP1L, MFAP4, ADAMTS9, TMEM246, PCDHA7, RNF130, PTPRC, GALNT14, LMBR1, NTRK3, NAALADL2, A…
HALLMARK_OXIDATIVE_PHOSPHORYLATION	0.214744	0.562776	0.170932	-0.307122	-1.1681	45	LDHA, TIMM13, ECH1, GPX4, SLC25A4, CYB5R3, PHB2, POLR2F, NDUFS8, COX4I1, MRPS22, GLUD1, UQCRC1, NDUFS2, IDH2, ECHS1, NDUFB8, PDHX, POR, IDH3B, NDUFA7, ETFA, IDH3A
HALLMARK_HEME_METABOLISM	0.22619	0.573016	0.186433	-0.259412	-1.11747	75	RAP1GAP, NARF, CTSB, TMCC2, ADD1, PPP2R5B, SNCA, PIGQ, MKRN1, BLVRA, HEBP1, NR3C1, BLVRB, PRDX2, DMTN, P4HA2, SEC14L1
Allen_Brain_Atlas_Developing_Human_Brain_Tissue_Gene_Expression_Profiles_by_RNAseq_Cerebellar_Cortex	0.244813	0.600187	0.0822055	0.232301	1.08326	659	FILIP1, PCDH17, LACC1, DPF3, GALNT2, TNR, FAM184A, ADCY8, FPGT-TNNI3K, EBF3, NPNT, CHST3, STK32B, SLC25A45, ZIC5, GRIN2B, PLK2, B3GNT2, FZD4, LRP1B, MGAT5, GABRA5, ZIC1, SCUBE1, PET117, ACSL1, PTGER4, DZIP1, DHX40, TENM3, CALB1, SEMA6D, SMARCA2, ARHGEF15, ADAMTSL5, DIS3L, HTR7P1, CGNL1, TSPAN9, CPNE8, FREM1, FILIP1L, KCNK9, PLXNC1, NPAS3, PTCH1, PCDHA7, LMBR1, BTBD3, TRIM5, ALX4, PYGL, FGF5, AREL…
HALLMARK_COAGULATION	0.303681	0.721242	0.138022	-0.283931	-1.07914	43	CRIP2, CTSB, SIRT2, CFD, SH2B2, THBS1, CAPN2
HALLMARK_EPITHELIAL_MESENCHYMAL_TRANSITION	0.31586	0.72716	0.0824344	0.283743	1.08398	82	PMP22, DKK1, COL6A3, ADAM12, MATN3, TGFBI, COL12A1, CTHRC1, CDH6, COL1A2, FBLN2, FBN2, COL16A1, CDH11, SLIT3, TNFAIP3, BMP1, FBLN5, PMEPA1, DST, ELN, GPX7, MYLK, CRLF1, WNT5A, LAMA2, ITGB1, COL5A1, COL4A1, FSTL3, TGFBR3, SERPINE2
HALLMARK_NOTCH_SIGNALING	0.327456	0.72716	0.118288	-0.365041	-1.08752	17	KAT2A, CUL1, CCND1
HALLMARK_INTERFERON_ALPHA_RESPONSE	0.334877	0.72716	0.086795	0.349701	1.08691	27	UBA7, ELF1, TRIM5, SP110, WARS, LPAR6, IL7, HELZ2
Intellectual_Disability_text_mining	0.357068	0.753086	0.0635008	0.224241	1.03925	575	FILIP1, PCDH17, ASTN2, GRIK2, PCDH10, CNTN4, KLF9, NRXN3, AGO2, MYO1B, STK32B, SHOC2, ZEB2, ZIC5, KCNJ6, GRIN2B, LRP1B, CNTNAP2, GABRA5, ZIC1, SLC4A10, ADAP2, ATP10A, SLC4A4, AMPH, ZADH2, GRM5, NRCAM, ZBTB7C, SACS, CALB1, SEMA3A, SMARCA2, VGLL3, PDE4D, PRKD1, LEMD3, TSPAN9, NPAS4, SLC4A8, KCNK9, UBE3A, NPAS3, KANK1, CNNM2, PTCH1, RCAN2, NAALADL2, AUTS2, ALX4, ATP8A2, DYNC1H1, CACNA1A, NPTX2, PLCL…
HALLMARK_KRAS_SIGNALING_UP	0.374667	0.753086	0.0730744	0.276071	1.0414	75	SPARCL1, F2RL1, PEG3, BTBD3, RGS16, BMP2, IKZF1, EPHB2, ABCB1, CPE, SPRY2, LCP1, TNFAIP3, BIRC3, CAB39L, GPRC5B, WDR33, MAP3K1, DNMBP, HDAC9, STRN, FLT4, ZNF277, PTPRR, ADAM17, DCBLD2, SCN1B, PLAT
HALLMARK_DNA_REPAIR	0.376543	0.753086	0.122679	-0.276598	-1.04327	41	STX3, DDB2, GMPR2, GPX4, LIG1, RFC3, POLR2F, POLE4, TAF12, ADRM1, SNAPC4, NME4, ERCC1
HALLMARK_REACTIVE_OXYGEN_SPECIES_PATHWAY	0.398396	0.754321	0.10925	-0.327941	-1.05074	22	SOD1, CDKN2D, MSRA, GPX4, PRDX2, LAMTOR5, PFKP, TXNRD2
Alzheimers_Disease_CNS_Brain_Hippocampus	0.402439	0.754321	0.172324	-0.201144	-1.01026	197	NDUFA10, SF3B5, CTSB, ATF4, STX1A, ZC3H3, AKT3, ADD1, PLD2, GRIP2, PTOV1, CLIP3, MCM3AP, PDLIM7, VRK3, RANBP3, TRAK1, GNAS, RHOBTB1, LARP4B, MYCN, DET1, MAN2A2, PCGF2, ECH1, GPX4, PLXNB2, SERBP1, POLR3E, SMARCC2, IFNGR2, SORL1, CRELD1, DRG1, GNAZ, FLOT1, FSCN1, MANSC1, PIP5K1A, B4GALT2, PTPRF, ZFP64, CALM2, TCF4, DTX3, TBC1D8, CTBP1, TLE2, KLHL22, SYNJ1, HMGXB3, NCOA2, HPS4, TMED3, CREBBP, YIF1A,…
HALLMARK_UV_RESPONSE_UP	0.413333	0.754321	0.121543	-0.243756	-1.0101	63	LHX2, DLG4, IGFBP2, FKBP4, MAPK8IP2, CNP, HSPA13, SLC25A4, STIP1, NPTXR, SQSTM1, EPHX1
Down_Syndrome_Fetus	0.421429	0.754321	0.0617054	0.237615	1.01822	198	PMP22, MYO1B, KCNK4, NCOA5, SYT4, INPP4B, KRT8, UBE3A, VAX1, RCAN2, TEAD4, GALNT14, ABCG5, CYGB, TMEM62, CTHRC1, ADHFE1, SP110, CDH6, RFX5, CP, CDH10, ANK3, CEP192, NEUROD1, EXOC2, SLC8A3, SLCO3A1, ZBTB8OS, RTN4RL1, CLDN4, ARPC1B, TH, UCP2, MSH2, BTBD9, PDE4B, RASA2, ZNF354A, USP8, SLC30A10, MAP3K1, ADAM19, SPEN, PRRC2B, LINGO3, MGAT3, LIMCH1, PIP4K2B, EGLN3
Intellectual_Disability	0.437008	0.754321	0.129443	-0.231007	-1.00472	81	KIRREL3, AHDC1, SYNGAP1, ACTG1, CEP135, ALDH3A2, PACS1, PTDSS1, CRADD, TECR, FOXP1, MEF2C, GRIN1, CTNNB1, TBC1D24, STXBP1, DYRK1A, TCF4, CEP152, MCPH1, ANKRD11
HALLMARK_APICAL_JUNCTION	0.439516	0.754321	0.130777	-0.225042	-0.998914	88	EXOC4, ACTG1, AKT3, CDH3, SPEG, BAIAP2, HRAS, MYL12B, AKT2, MDK, JUP, NLGN2, ATP1A3, CD34, GNAI2, CD276, PFN1, NRXN2, FSCN1, ACTN1, PBX2, STX4, CERCAM, VAV2, PKD1, LAMB3, SHC1, ICAM5, CLDN18, PLCG1, GAMT, RSU1, DHX16, INSIG1, EVL
HALLMARK_UV_RESPONSE_DN	0.44837	0.754321	0.0650878	0.267406	1.00127	73	PMP22, AMPH, PIK3R3, ADORA2B, INPP4B, CACNA1A, COL1A2, APBB2, KALRN, SIPA1L1, PTPRM, IGF1R, RASA2, SCN8A, FBLN5, TJP1, FYN, SLC7A1, DLC1, PRKCE, KCNMA1, ATXN1, TGFBR3, CDK13, ANXA2, LPAR1, RND3, COL11A1
HALLMARK_WNT_BETA_CATENIN_SIGNALING	0.459948	0.754321	0.0982123	-0.316939	-1.01224	21	KAT2A, NCOR2, CSNK1E, CUL1, CTNNB1, CCND2, NUMB
HALLMARK_ADIPOGENESIS	0.466488	0.754321	0.0625237	0.258003	0.9947	87	SPARCL1, MARC2, FZD4, ABCA1, ENPP2, MAP4K3, BCL6, PHYH, PQLC3, ITIH5, GBE1, UCP2, ACADM, CAT, PTGER3, APLP2, TANK, EPHX2
HALLMARK_PROTEIN_SECRETION	0.540845	0.815878	0.0937465	-0.286586	-0.941633	24	SOD1, BNIP3, TPD52, GNAS
HALLMARK_UNFOLDED_PROTEIN_RESPONSE	0.552553	0.815878	0.0962406	-0.257065	-0.939395	37	VEGFA, ATF4, ZBTB17, EXOSC2, CHAC1
HALLMARK_IL6_JAK_STAT3_SIGNALING	0.55493	0.815878	0.0922597	-0.294837	-0.952873	23	TNFRSF1A, CNTFR, STAT3, TYK2, IFNGR2
HALLMARK_TGF_BETA_SIGNALING	0.592068	0.815878	0.0888945	-0.278111	-0.921495	25	NCOR2, SKI, THBS1, IFNGR2, PPP1CA, CTNNB1
HALLMARK_PEROXISOME	0.59633	0.815878	0.0928481	-0.243709	-0.929294	44	DLG4, SOD1, HRAS, TSPO, ECH1, SLC25A4, HMGCL, ABCB9, PEX14, CTBP1, HSD17B4, FIS1, ERCC1, IDH2, ABCC8
HALLMARK_P53_PATHWAY	0.597744	0.815878	0.105125	-0.220806	-0.947405	73	PRMT2, APP, NDRG1, BAIAP2, HRAS, DDB2, FDXR, RAD9A, PLXNB2, EPHX1, IER3, MXD4, RXRA, SPHK1, CCND2, RPL36, RAD51C, ZNF365, CCND3, RNF19B
HALLMARK_SPERMATOGENESIS	0.60303	0.815878	0.0561767	0.286406	0.908421	30	CLGN, NOS1, MTOR, STRBP, PACRG, AURKA, PIAS2, OAZ3
HALLMARK_ALLOGRAFT_REJECTION	0.619186	0.815878	0.0530213	0.266737	0.908694	42	IGSF6, ST8SIA4, LYN, PTPRC, HLA-DMA, WARS, PSMB10, BRCA1, CD8B, CARTPT, IL7, EGFR, BCAT1, HDAC9, IL16, PRKCB
HALLMARK_HYPOXIA	0.624521	0.815878	0.103576	-0.210686	-0.928406	83	VEGFA, LDHA, NDRG1, RORA, BHLHE40, TPD52, PFKFB3, NR3C1, GPC1, GAPDH, HDLBP, P4HA2, IER3, CXCR4, PFKP, MAFF, BCL2, HK1, INHA, PLAUR, DPYSL4, CA12, CDKN1C, TGFB3, EFNA3
HALLMARK_KRAS_SIGNALING_DN	0.63467	0.815878	0.0512184	0.251633	0.892794	54	SIDT1, RYR1, TG, NOS1, PTPRJ, COL2A1, FGGY, P2RX6
HALLMARK_E2F_TARGETS	0.641026	0.815878	0.0913924	-0.231224	-0.915782	52	STMN1, SLBP, DCTPP1, POLD2, HMGA1, CCNB2, LIG1, RFC3, SMC4, DNMT1, RAD51C, POLE4, SPAG5, ILF3, MCM7
HALLMARK_IL2_STAT5_SIGNALING	0.644444	0.815878	0.0995791	-0.213946	-0.91754	72	NDRG1, MYO1E, RORA, BHLHE40, TIAM1, CYFIP1, AGER, GPX4, PLEC, P2RX4, ST3GAL4, ETV4, MYO1C, RNH1, MAFF, CCND2, BCL2, CCND3, CDKN1C, GLIPR2
Allen_Brain_Atlas_Developing_Human_Brain_Tissue_Gene_Expression_Profiles_by_RNAseq_Primary_Auditory_Cortex.Core	0.645833	0.815878	0.17822	-0.178743	-0.953216	357	NTNG2, NDUFV3, EML6, IL27RA, RABL6, LPL, MRPS6, ATF4, SYBU, BOC, CAMKV, CDH3, PPP1R13L, NCOR2, SLBP, CAPN1, SERINC5, TSPO, ZDHHC11, SLC2A4RG, AKT2, RHOBTB1, LARP4B, INHBA, RECQL5, SCNN1D, LZTS2, LRRN3, TRPC4, PACS1, FAM81A, CHAC1, KIF1C, KREMEN2, CRADD, THBS1, FOXP1, PIN1, MEF2C, MRPS2, ST6GAL2, SLC35C1, PAXBP1-AS1, SMTNL2, BTNL9, RTN1, VOPP1, DCBLD1, PREX1, DGKQ, CRYBB2P1, SERTAD2, GNAO1, CCDC18…
HALLMARK_G2M_CHECKPOINT	0.658046	0.815878	0.0496901	0.247131	0.88669	58	LBR, BIRC5, PRIM2, RASAL2, CDC6, ODF2, TLE3, SRSF10, AURKA, E2F1, PAFAH1B1, GINS2, KIF11, SLC7A5, SLC7A1, BUB3, ORC5
Allen_Brain_Atlas_Developing_Human_Brain_Tissue_Gene_Expression_Profiles_by_RNAseq_CTD.Gene_Disease.Associations_ID	0.665584	0.815878	0.0899861	-0.221597	-0.907065	57	SYNGAP1, RABL6, KDM6B, COL18A1, CACNA1G, GNAS, CAPN10, MEF2C
HALLMARK_ESTROGEN_RESPONSE_EARLY	0.679167	0.819312	0.103576	-0.204291	-0.913727	92	ABLIM1, SLC9A3R1, TUBB2B, FKBP4, SYBU, BHLHE40, NCOR2, TIAM1, SEMA3B, FLNB, RARA, CCND1, SLC37A1, BLVRB, AKAP1, CELSR1, ARL3, CXCL12, KDM4B, ADD3, BCL2
HALLMARK_GLYCOLYSIS	0.712598	0.846211	0.0972151	-0.20473	-0.890432	81	VEGFA, NDUFV3, LDHA, SOD1, FKBP4, STMN1, PKM, GPC1, HDLBP, P4HA2, B3GAT3, IER3, CXCR4, PFKP, B4GALT2, TSTA3, GALE, PLOD1, DPYSL4
HALLMARK_HEDGEHOG_SIGNALING	0.731458	0.855243	0.0721798	-0.26324	-0.812653	19	VEGFA, TLE1, CNTFR, RTN1, CELSR1
HALLMARK_BILE_ACID_METABOLISM	0.780236	0.898454	0.0431037	0.239893	0.808789	41	ACSL1, ABCA1, EFHC1, PHYH, RBP1, CAT, SLC23A1, EPHX2, PEX11G, LONP2, PIPOX, BCAR3, ABCG4, ATXN1, CYP46A1, LIPE, SLC23A2
Allen_Brain_Atlas_Developing_Human_Brain_Tissue_Gene_Expression_Profiles_by_RNAseq_amygdaloid_complex	0.794872	0.901646	0.0246382	0.194338	0.913263	897	HSPA12A, PCDH17, CNIH3, CLSTN2, AJAP1, LACC1, ASTN2, GRIK2, CNTN4, FBXW7, RAB4B, TCERG1L, MARC2, HS6ST3, SULF2, TMEM232, CHST3, TRIM9, F2RL1, KCNA1, HAPLN1, ARL4C, GRIN2B, B3GNT2, KCNK4, SLC7A7, LRP1B, TXNRD1, ECT2L, KCNB1, ZADH2, PET117, MATN1, GRM5, NCOA5, SLC35F3, VSTM2L, FHDC1, DHX40, SOSTDC1, MAGI3, MYADML2, ADAMTSL5, SPTB, VGLL3, COL12A1, IGSF9B, PRKD1, ST3GAL5, OXCT1, KCNQ5, SGPL1, BCL6, U…
HALLMARK_ANDROGEN_RESPONSE	0.837037	0.935512	0.0400846	0.227613	0.774189	44	INPP4B, KRT8, CAMKK2, SLC38A2, HERC3, ELL2, HMGCR, ARID5B, PMEPA1, SPCS3
HALLMARK_MTORC1_SIGNALING	0.868195	0.956273	0.036839	0.21095	0.753935	56	ACACA, TXNRD1, PIK3R3, FKBP2, WARS, GBE1, HMGCR, AURKA, CD9, SLC7A5, EGLN3, BCAT1, ELOVL5, UCHL5
Allen_Brain_Atlas_Developing_Human_Brain_Tissue_Gene_Expression_Profiles_by_RNAseq_Posterior.Caudal_Superior_Temporal_Cortex_Area.22c	0.884783	0.960621	0.0218679	0.186199	0.848798	465	ITPR2, TNXB, TNR, DKK1, DDR2, AGO2, HS6ST3, LSAMP, IGSF6, ADAP2, PEG3, KCNB1, PET117, MTUS1, NOS3, KY, CNKSR3, PREX2, SOSTDC1, INPP4B, GRP, ZCWPW2, IGSF9B, SHC3, SCAF11, FREM1, PITPNC1, PTPRJ, PPP2R1B, ACTL10, PCDHA7, RNF130, GREB1, ZNF621, NAALADL2, ADRA1A, NAALADL1, RGS16, CTHRC1, PCDHA11, PAPPA, PDE1C, SIK2, RFX5, ILDR2, VPS13D, ZNF426, MEGF11, IRAK4, NR2C2, ZNF469, CAMTA1, CAPS2, MED12L, PCDH…
Allen_Brain_Atlas_Developing_Human_Brain_Tissue_Gene_Expression_Profiles_by_RNAseq_Hippocampus_Hippocampal_Formation	0.897436	0.960636	0.24134	-0.164671	-0.912459	607	ADARB1, CSAD, FBRSL1, TNK2, RASSF7, HSF2BP, LAMA5, PCNT, ULK1, SSBP4, SEZ6L, RABL6, MRPS6, COL9A2, MIB2, GMEB2, CDCA7, DMPK, GNB3, PDIA2, NCOR2, SPEG, ETV1, TMEM120B, BAIAP2, SYN3, ASAH1, LY6H, ZBTB17, SLBP, CAPZB, ATIC, ALDH3A2, DYDC2, SETD1A, CDK10, SPIRE2, TMTC4, KLC4, ZDHHC11, SPTBN4, CYFIP1, CBX4, UVSSA, INHBA, RECQL5, SCNN1D, LZTS2, MED15, LRRN3, MAN2A2, JAK1, CAPN10, RBFOX3, SEMA3B, KIF1C,…
Abnormality_Of_Neuronal_Migration	0.958453	0.99511	0.0321428	0.18454	0.654747	54	GDF6, DYNC1H1, OCLN, ARFGEF2, POMGNT1, NDE1, PDGFB, CRB1, FKRP, PAFAH1B1, POMT2, RMND1, PEX10, FTO, ZNF423, LAMA2, COL4A1, GRIP1, KIF5C, KAT6B
HALLMARK_COMPLEMENT	0.969014	0.99511	0.0307753	0.184171	0.676297	67	LYN, F7, CP, DOCK10, PDGFB, DGKH, TNFAIP3, LIPA, USP8, HPCAL4, FYN, PRCP, DOCK4, PREP, SPOCK2, VCPIP1, DPP4, RASGRP1, PLAT, ZFPM2, MT3, CDH13, ME1, IRF2, F3, XPNPEP1, SRC, DOCK9
HALLMARK_PANCREAS_BETA_CELLS	0.97555	0.99511	0.0560596	-0.208389	-0.576922	13	AKT3, STXBP1
Allen_Brain_Atlas_Developing_Human_Brain_Tissue_Gene_Expression_Profiles_by_RNAseq_Inferolateral_Temporal_Cortex_Area.Tev_Area.20	0.991081	0.99511	0.0161937	0.163101	0.73122	339	ADAMTS14, AMPD3, MAPKAPK3, ABHD1, PEG3, KY, PREX2, TMCO4, SOSTDC1, SYT4, RUNX2, IGSF9B, SCAF11, NAV3, TSPAN9, RNF19A, PLXNC1, MYO16, PCDHA7, HLA-DMA, PPCDC, RGS16, FERMT3, AREL1, SP110, GPT, RINL, PCDHA11, RFX5, FGGY, MEGF11, ZNF469, PKP2, OXNAD1, PCDHA9, SLC8A3, PIK3AP1, PELO, BRCA1, COL16A1, ERMAP, ACADM, HMGCR, EFNB3, SARM1, PCDHAC2, E2F1, CACNA2D1, NOD1, TFB1M, TMEM102
HALLMARK_MYC_TARGETS_V2	0.99511	0.99511	0.0551352	-0.17809	-0.49304	13	DCTPP1, SLC19A1, TCOF1

## Sheet: GSE_eQTM
pathway	pval	padj	log2err	ES	NES	size	Gene_Name
Down_Syndrome_text_mining	0.00102473	0.0778796	0.45506	-0.296947	-1.50818	218	PRMT2, PDE9A, POFUT2, NDUFV3, PDXK, SUMO3, GABPA, JAM2, OTUB1, CTSB, PCNT, APP, MORC3, CHAF1B, SOD1, UNC5A, ACTG1, TTC3, NCK2, COL18A1, ITSN1, JAK3, TMEM50B, HRAS, TIAM1, MCM3AP, HSPA13, CXADR, PTTG1IP, RRP1B, CCT8, JAK1, PFKM, NLGN2, CRADD, CD34, GPX4, HMGN1, VAC14, SETD4, EDNRB, RTN1, IFNGR2, PHB2, GLIS2, EIF3F, GAPDH, PIGP, CRELD1, CORO7, MAP4, WRB, RBM11, PFKP, IFNAR2, DYRK1A, SIM2, GART, GAB…
Allen_Brain_Atlas_Developing_Human_Brain_Tissue_Gene_Expression_Profiles_by_RNAseq_Anterior.Rostral_Cingulate.Medial_Prefrontal_Cortex	0.00493795	0.156624	0.407018	0.309816	1.39619	363	FAM110C, PCDH17, CBLN2, FNIP2, TIGD6, ZNF114, SEMA3C, FNDC1, ACACA, STK32B, MDH1B, PTPRO, ABHD1, EXOC6, PET117, MATN1, GRM5, VSTM2L, MDGA1, SULF1, SOSTDC1, SYT4, GRP, SMARCA2, CSMD3, GAS2, SLC26A11, DIS3L, IGSF9B, NAV3, CPNE8, DSC2, PLXNC1, MYO16, PCDHA7, SDK2, PPCDC, DCTN1-AS1, TMEM62, COCH, PCDHA11, PAPPA, CCDC144A, CRIM1, PROM1, APBB2, IMMP1L, VKORC1, WWP2, CDH10, B4GALT5, SLC37A3, PCDHA9, SH3…
Allen_Brain_Atlas_Developing_Human_Brain_Tissue_Gene_Expression_Profiles_by_RNAseq_Ventrolateral_Prefrontal_Cortex	0.00618254	0.156624	0.407018	0.303004	1.36749	375	FAM110C, CNIH3, CBLN2, FNIP2, CNTN4, GALNT2, DKK1, ADCY8, FPGT-TNNI3K, FNDC1, COL6A3, NPNT, ADAM12, TMEM200C, STK32B, SLC7A7, KLHL14, EXOC6, PEG3, MTUS1, VSTM2L, SULF1, SOSTDC1, SYT4, SDK1, GRP, SLC9A2, SLC26A11, IGSF9B, SCAF11, CPNE8, DSC2, ADAMTS9-AS2, RNF19A, MYO16, ADAMTS9, PTCH1, PCDHA7, RNF130, ALX4, PHYH, IMPA2, TMEM62, COCH, GPT, PCDHA11, COL1A2, RFX5, PROM1, FGGY, WWP2, CDH10, SLC16A5, M…
Down_Syndrome	0.0130921	0.212748	0.38073	-0.256001	-1.29971	227	VEGFA, ANKS1B, PDXK, LAMA5, CTSB, APP, SLC9A3R1, CHAF1B, SOD1, GSTP1, TTC3, NDRG1, STMN1, ITSN1, JAK3, GPSM1, NCOR2, THRA, MAGI2, DRD4, AKT2, HMGB1, WDR46, PRR5, MYCN, TNFRSF1A, SNCA, MITF, PCGF2, AGER, SMG6, JAK1, STAT3, MAPK3, NPHS1, MAD2L2, SLC45A3, THBS1, PIN1, CCND1, EDNRB, SORL1, SGTA, CTNNB1, PIGP, CRELD1, PRDX2, PFN1, SLC39A4, LIMK1, MEN1, DYRK1A, HLA-A, SIM2, TRADD, SPHK1, AKT1, GART, NF…
HALLMARK_MYC_TARGETS_V1	0.0153883	0.212748	0.38073	-0.395504	-1.54511	48	LDHA, PSMD8, EIF4H, POLD2, CUL1, LSM7, SERBP1, LSM2, SNRPG, PHB2, RPS3, PABPC4, ACP1, MCM7, YWHAE, ODC1, YWHAQ, MRPL23, SF3A1
Allen_Brain_Atlas_Developing_Human_Brain_Tissue_Gene_Expression_Profiles_by_RNAseq_Striatum_24	0.0167959	0.212748	0.352488	0.280441	1.27978	474	FAM110C, PCDH10, KCNA5, FBXW7, RAB4B, ROBO1, MYO1B, NUF2, MSRB3, F2RL1, DRD2, ARL4C, FZD4, DYSF, PDE10A, CNTNAP2, KLHL14, ADAP2, DACT2, PREX2, RASSF3, MDGA1, PTGER4, CLGN, SOSTDC1, OLFML2B, GTSE1, TENM3, SACS, GRP, LAMP5, RUNX2, DIS3L, SMOC2, COL12A1, HTR7P1, CGNL1, DCHS2, EPN3, TSPAN9, BIRC5, NOS1, KAZALD1, FREM1, FILIP1L, ADAMTS9-AS2, ADORA2A, TMEM192, EFHC1, KCNK9, PLXNC1, ARRDC2, LMBR1, MGST2…
Allen_Brain_Atlas_Developing_Human_Brain_Tissue_Gene_Expression_Profiles_by_RNAseq_Primary_Visual_Cortex_Striate_Cortex_AreaV1.17	0.023895	0.259431	0.352488	0.306142	1.34124	252	PCDH17, AJAP1, GRIK2, DPF3, TCERG1L, TMEM232, LSAMP, STK32B, KCNA1, MDH1B, SETD9, LRP1B, PDE8A, PEG3, MTUS1, ZBTB7C, INPP4B, MYADML2, ADAMTSL5, TMEM56, ZCWPW2, IGSF9B, ST3GAL5, USH2A, NOS1, RNF19A, PTPRJ, BTBD3, PPCDC, PHYH, RGS16, BRINP1, PAPPA, ZBTB20, PLCXD3, DERA, IMMP1L, F7, B4GALT5, BTD, OXNAD1, MYO7A, PLXNA2, PIK3AP1, ADCY1, SGMS1, PDE7B, TMEM132E, ACADM, RALB, MGST1, DGKH, SV2C, SLC6A7, L…
HALLMARK_CHOLESTEROL_HOMEOSTASIS	0.0290015	0.262939	0.352488	-0.494662	-1.58493	22	LPL, ACTG1, LSS, STX5, ECH1, SEMA3B, CTNNB1, ABCA2, MAL2, PLAUR, CBS
HALLMARK_ANGIOGENESIS	0.0311375	0.262939	0.352488	-0.650361	-1.65585	10	VEGFA, APP, LPL
Allen_Brain_Atlas_Developing_Human_Brain_Tissue_Gene_Expression_Profiles_by_RNAseq_Primary_Somatosensory_Cortex_Area.S1_Areas3.1.2	0.0402259	0.305717	0.321776	-0.220971	-1.16974	346	EXPH5, CRIP2, NDUFV3, EML6, SYNGAP1, STX3, EXOC4, IL27RA, SEZ6L, LPL, CHST8, ATF4, MMP17, SYBU, BOC, CAMKV, DLGAP4, CACNG7, CREB5, CDH3, PPP1R13L, ISYNA1, MAST1, IGSF21, CLIP3, SLBP, ARHGAP33, CAPN1, COMTD1, TSPO, SEMA7A, RHOBTB1, LARP4B, INHBA, RECQL5, CELF3, LRRN3, PACS1, FAM81A, THBS1, RNF149, FOXP1, MEF2C, VAC14, MRPS2, SLC35C1, SMTNL2, RTN1, TUB, VOPP1, LRRC73, SERTAD2, P2RX4, GNAO1, DALRD3,…
HALLMARK_XENOBIOTIC_METABOLISM	0.0506072	0.34965	0.321776	-0.334272	-1.36735	58	CSAD, RAP1GAP, NDRG2, JUP, TNFRSF1A, ABHD6, ECH1, LONP1, ACOX3, BLVRB, EPHX1, TGFB2, SPINT2, GART, PYCR1, ACP1
HALLMARK_MYOGENESIS	0.0605257	0.354433	0.321776	-0.297756	-1.33102	91	EFS, ABLIM1, APP, AEBP1, CAMK2B, DMPK, BHLHE40, SPEG, DAPK2, SIRT2, PDLIM7, AKT2, CFD, SGCD, PFKM, PTP4A3, MAPRE3, MEF2C, PLXNB2, CHRNB1
HALLMARK_APICAL_SURFACE	0.0652866	0.354433	0.222056	0.48583	1.42979	22	SULF2, SCUBE1, MDGA1, LYN, CD160, ATP8B1, RTN4RL1, BRCA1, CX3CL1, AKAP7, TMEM8B
HALLMARK_MITOTIC_SPINDLE	0.0652903	0.354433	0.287805	-0.297068	-1.3099	85	EZR, PCNT, NCK2, ITSN1, MYO1E, KLC1, CAPZB, TIAM1, CYTH2, WASF2, FLNB, CCNB2, CLIP2, MARK4, NUMA1, SMC4, PREX1, ARHGEF2, RALBP1, FSCN1, ARHGAP27, SUN2, CNTROB, SORBS2, SYNPO, YWHAE, FGD6
Allen_Brain_Atlas_Developing_Human_Brain_Tissue_Gene_Expression_Profiles_by_RNAseq_Dorsolateral_Prefrontal_Cortex	0.0743169	0.364037	0.169571	0.269399	1.22169	402	CBLN2, FNIP2, TIGD6, CNTN4, GALNT2, DKK1, ADCY8, SEMA3C, FNDC1, ACACA, COL6A3, NPNT, TMEM200C, STK32B, DRD2, PTPRO, KLHL14, EXOC6, PEG3, VSTM2L, SULF1, SOSTDC1, SYT4, SDK1, GRP, CSMD3, PDE4D, IGSF9B, NAV3, USH2A, CPNE8, DSC2, FREM1, RNF19A, MYO16, ADAMTS9, PTCH1, PCDHA7, PPCDC, NAALADL2, DCTN1-AS1, TMEM62, CTHRC1, COCH, BMP2, ATP8B1, ADHFE1, GPT, PCDHA11, RFX5, PROM1, APBB2, PDSS1, TEC, WWP2, B4G…
Down_Syndrome_CNS_Brain_Cerebellum	0.0766393	0.364037	0.287805	-0.233546	-1.17329	203	NDUFV3, SON, SOD1, RALY, SMARCD1, ACIN1, ITSN1, DMPK, YTHDF1, TIMM13, PDLIM7, COMTD1, PCBP4, RABGGTB, CUL1, CORO1A, CAPN10, DDX6, HMGN1, RAB7A, SLC25A4, AKR1B1, SLC25A39, MRPS2, PLXNB2, GAPDH, GNAI2, SQSTM1, STK11IP, DTNB, NEDD8, PAPSS1, LIMK1, COX4I1, IFNAR2, CXCL12, DYRK1A, GART, IFT27, TSTA3, USP7, CLK3, COQ10A, PBX2, CCND3, DPYSL4, ACP1, LIMD1, NUBP1, UNC45A, ITPK1, HSD17B4, YWHAQ, PAM16, DNP…
HALLMARK_INTERFERON_GAMMA_RESPONSE	0.0945559	0.411911	0.172324	0.368487	1.30739	54	OAS3, ST8SIA4, ST3GAL5, HLA-DMA, AUTS2, SP110, WARS, PSMB10, UPP1, NLRC5, ARID5B, PDE4B, TNFAIP3, NOD1, IL7, HELZ2
HALLMARK_APOPTOSIS	0.101974	0.411911	0.257206	-0.313774	-1.26985	56	APP, SOD1, FEZ1, ADD1, FDXR, TSPO, PPP2R5B, GPX4, RARA, CCND1, CTNNB1, SQSTM1, TGFB2, IER3, CCND2
Neuronal_System	0.102978	0.411911	0.152145	0.30248	1.24183	139	GRIK2, KCNA5, GRIK3, ADCY8, KCNA1, KCNJ6, GRIN2B, KCNK4, GABRA5, KCNB1, ADCY2, PANX1, KCNQ5, CHRNA2, KCNK9, CACNG2, KCNMB2, CACNA1A, KCNAB1, CACNA1E, KCNA4, GABRB3, ABCC9, ADCY1, SLC38A2, KCNC1, CACNB4, GNG7, KCNN3
HALLMARK_FATTY_ACID_METABOLISM	0.137615	0.522936	0.2114	-0.322986	-1.23159	44	LDHA, ALDH3A2, AUH, ECH1, BLVRA, HMGCL, EPHX1, NTHL1, HIBCH, REEP6, MGLL, GPD2, ODC1, HSD17B4, S100A10, ECHS1, ACOX1
Down_Syndrome_Brain	0.149701	0.532322	0.287857	-0.224989	-1.12441	192	PRMT2, NR2F1, SON, SUMO3, ABLIM1, EPHA3, CTSB, APP, AKT3, GFPT2, THRA, TMEM50B, SYN3, CAPZB, TIAM1, MCM3AP, MED27, ATP2C2, CSK, PRR5, MYCN, SGCD, MAPK3, SNRPC, HMGN1, RAB7A
HALLMARK_PI3K_AKT_MTOR_SIGNALING	0.160116	0.532322	0.130106	0.359914	1.24112	47	ITPR2, THEM4, ACACA, ADCY2, PIK3R3, PPP2R1B, IRAK4, MKNK2, RALB, E2F1, NOD1, CAB39L, EIF4E, EGFR, MAPK9
Allen_Brain_Atlas_Developing_Human_Brain_Tissue_Gene_Expression_Profiles_by_RNAseq_Orbital_Frontal_Cortex	0.165069	0.532322	0.10673	0.244009	1.12373	520	CNIH3, CBLN2, CNTN4, CUBN, CREB3L2, GALNT2, DKK1, ADCY8, FNDC1, LSAMP, NPNT, PLA2R1, STK32B, KLHL14, TOX, EXOC6, ECT2L, PEG3, PET117, VSTM2L, TMCO4, SULF1, SOSTDC1, SYT4, MYADML2, GRP, SLC26A11, SCAF11, CPNE8, DSC2, FREM1, RNF19A, PLXNC1, MYO16, PTCH1, NAE1, PCDHA7, RNF130, PPCDC, NAALADL2, PHYH, B3GNTL1, DCTN1-AS1, TMEM62, CTHRC1, COCH, ATP8B1, GPT, PCDHA11, ZBTB20, RFX5, BRINP3, PROM1, CDH10, S…
HALLMARK_INFLAMMATORY_RESPONSE	0.182222	0.532322	0.122108	0.35818	1.21829	44	SLC4A4, PTGER4, ABCA1, ADORA2B, CD82, LYN, KCNMB2, RGS16, ITGB8, PDE4B, P2RX7, TPBG, CX3CL1, PTPRE, FZD5, SLC7A1, RASGRP1, DCBLD2, SCN1B, CHST2, SLC1A2
Allen_Brain_Atlas_Developing_Human_Brain_Tissue_Gene_Expression_Profiles_by_RNAseq_Primary_Motor_Cortex_Area.M1_Area.4	0.187075	0.532322	0.102822	0.255222	1.13371	302	CNTN4, DKK1, SEMA3C, B3GALT5, NPNT, STK32B, IGSF6, HAS3, SLC7A7, KLHL14, EXOC6, MEG3, SOSTDC1, GRP, SLC26A11, SLC47A1, IGSF9B, USH2A, MYO16, PTCH1, PCDHA7, RNF130, ZNF621, PPCDC, CMTM2, TMEM62, CTHRC1, AREL1, COCH, TARBP1, GPT, RGL4, PCDHA11, ZBTB20, PROM1, PXDNL, FGGY, MST1R, ABCC9, PCID2, OXNAD1, SLN, PCDHA9, AGAP1, SLC8A3, MPRIP, PKD1L1, GBE1, CLDN4, HIPK2, LRRD1, NTN4, TBC1D2, CCDC3, DGKH, LI…
HALLMARK_ESTROGEN_RESPONSE_LATE	0.192913	0.532322	0.202072	-0.262929	-1.14356	81	SLC9A3R1, CHST8, FKBP4, NCOR2, SLC29A1, ALDH3A2, TIAM1, MDK, JAK1, SEMA3B, FLNB, CCND1, LLGL2, MEST, HOMER2, BLVRB, DNAJC12, ARL3, CXCL12, ADD3, BCL2, TSTA3, GALE, FAM102A, CA12
HALLMARK_TNFA_SIGNALING_VIA_NFKB	0.19323	0.532322	0.114751	0.322107	1.18043	66	KLF9, F2RL1, EFNA1, PLK2, PTGER4, ABCA1, PANX1, BCL6, DUSP4, BMP2, NFAT5, B4GALT5, CLCF1, PDE4B, TNFAIP3, BIRC3, TANK, PTPRE, PMEPA1
Allen_Brain_Atlas_Developing_Human_Brain_Tissue_Gene_Expression_Profiles_by_RNAseq_Mediodorsal_Nucleus_Of_Thalamus	0.196118	0.532322	0.0937465	0.234221	1.09869	801	ADAMTS18, PCDH17, CBLN2, CNTN4, ALPK3, TNXB, TNR, FSCN2, TCERG1L, SLC25A13, AGO2, KIAA1755, MYO1B, COL6A3, TMEM200C, DRD2, KCNA1, ZEB2, SETD9, GRIN2B, KCNK4, SLC7A7, SLC5A2, ADAP2, MATN3, KCNB1, PET117, POPDC3, CNKSR3, PREX2, SULF1, SEMA6D, COLCA2, SLC26A11, SLC47A1, DIS3L, COL12A1, DCHS2, KCNQ5, BCL6, TG, FILIP1L, MFAP4, ADAMTS9, TMEM246, PCDHA7, RNF130, PTPRC, GALNT14, LMBR1, NTRK3, NAALADL2, A…
HALLMARK_OXIDATIVE_PHOSPHORYLATION	0.214744	0.562776	0.170932	-0.307122	-1.1681	45	LDHA, TIMM13, ECH1, GPX4, SLC25A4, CYB5R3, PHB2, POLR2F, NDUFS8, COX4I1, MRPS22, GLUD1, UQCRC1, NDUFS2, IDH2, ECHS1, NDUFB8, PDHX, POR, IDH3B, NDUFA7, ETFA, IDH3A
HALLMARK_HEME_METABOLISM	0.22619	0.573016	0.186433	-0.259412	-1.11747	75	RAP1GAP, NARF, CTSB, TMCC2, ADD1, PPP2R5B, SNCA, PIGQ, MKRN1, BLVRA, HEBP1, NR3C1, BLVRB, PRDX2, DMTN, P4HA2, SEC14L1
Allen_Brain_Atlas_Developing_Human_Brain_Tissue_Gene_Expression_Profiles_by_RNAseq_Cerebellar_Cortex	0.244813	0.600187	0.0822055	0.232301	1.08326	659	FILIP1, PCDH17, LACC1, DPF3, GALNT2, TNR, FAM184A, ADCY8, FPGT-TNNI3K, EBF3, NPNT, CHST3, STK32B, SLC25A45, ZIC5, GRIN2B, PLK2, B3GNT2, FZD4, LRP1B, MGAT5, GABRA5, ZIC1, SCUBE1, PET117, ACSL1, PTGER4, DZIP1, DHX40, TENM3, CALB1, SEMA6D, SMARCA2, ARHGEF15, ADAMTSL5, DIS3L, HTR7P1, CGNL1, TSPAN9, CPNE8, FREM1, FILIP1L, KCNK9, PLXNC1, NPAS3, PTCH1, PCDHA7, LMBR1, BTBD3, TRIM5, ALX4, PYGL, FGF5, AREL…
HALLMARK_COAGULATION	0.303681	0.721242	0.138022	-0.283931	-1.07914	43	CRIP2, CTSB, SIRT2, CFD, SH2B2, THBS1, CAPN2
HALLMARK_EPITHELIAL_MESENCHYMAL_TRANSITION	0.31586	0.72716	0.0824344	0.283743	1.08398	82	PMP22, DKK1, COL6A3, ADAM12, MATN3, TGFBI, COL12A1, CTHRC1, CDH6, COL1A2, FBLN2, FBN2, COL16A1, CDH11, SLIT3, TNFAIP3, BMP1, FBLN5, PMEPA1, DST, ELN, GPX7, MYLK, CRLF1, WNT5A, LAMA2, ITGB1, COL5A1, COL4A1, FSTL3, TGFBR3, SERPINE2
HALLMARK_NOTCH_SIGNALING	0.327456	0.72716	0.118288	-0.365041	-1.08752	17	KAT2A, CUL1, CCND1
HALLMARK_INTERFERON_ALPHA_RESPONSE	0.334877	0.72716	0.086795	0.349701	1.08691	27	UBA7, ELF1, TRIM5, SP110, WARS, LPAR6, IL7, HELZ2
Intellectual_Disability_text_mining	0.357068	0.753086	0.0635008	0.224241	1.03925	575	FILIP1, PCDH17, ASTN2, GRIK2, PCDH10, CNTN4, KLF9, NRXN3, AGO2, MYO1B, STK32B, SHOC2, ZEB2, ZIC5, KCNJ6, GRIN2B, LRP1B, CNTNAP2, GABRA5, ZIC1, SLC4A10, ADAP2, ATP10A, SLC4A4, AMPH, ZADH2, GRM5, NRCAM, ZBTB7C, SACS, CALB1, SEMA3A, SMARCA2, VGLL3, PDE4D, PRKD1, LEMD3, TSPAN9, NPAS4, SLC4A8, KCNK9, UBE3A, NPAS3, KANK1, CNNM2, PTCH1, RCAN2, NAALADL2, AUTS2, ALX4, ATP8A2, DYNC1H1, CACNA1A, NPTX2, PLCL…
HALLMARK_KRAS_SIGNALING_UP	0.374667	0.753086	0.0730744	0.276071	1.0414	75	SPARCL1, F2RL1, PEG3, BTBD3, RGS16, BMP2, IKZF1, EPHB2, ABCB1, CPE, SPRY2, LCP1, TNFAIP3, BIRC3, CAB39L, GPRC5B, WDR33, MAP3K1, DNMBP, HDAC9, STRN, FLT4, ZNF277, PTPRR, ADAM17, DCBLD2, SCN1B, PLAT
HALLMARK_DNA_REPAIR	0.376543	0.753086	0.122679	-0.276598	-1.04327	41	STX3, DDB2, GMPR2, GPX4, LIG1, RFC3, POLR2F, POLE4, TAF12, ADRM1, SNAPC4, NME4, ERCC1
HALLMARK_REACTIVE_OXYGEN_SPECIES_PATHWAY	0.398396	0.754321	0.10925	-0.327941	-1.05074	22	SOD1, CDKN2D, MSRA, GPX4, PRDX2, LAMTOR5, PFKP, TXNRD2
Alzheimers_Disease_CNS_Brain_Hippocampus	0.402439	0.754321	0.172324	-0.201144	-1.01026	197	NDUFA10, SF3B5, CTSB, ATF4, STX1A, ZC3H3, AKT3, ADD1, PLD2, GRIP2, PTOV1, CLIP3, MCM3AP, PDLIM7, VRK3, RANBP3, TRAK1, GNAS, RHOBTB1, LARP4B, MYCN, DET1, MAN2A2, PCGF2, ECH1, GPX4, PLXNB2, SERBP1, POLR3E, SMARCC2, IFNGR2, SORL1, CRELD1, DRG1, GNAZ, FLOT1, FSCN1, MANSC1, PIP5K1A, B4GALT2, PTPRF, ZFP64, CALM2, TCF4, DTX3, TBC1D8, CTBP1, TLE2, KLHL22, SYNJ1, HMGXB3, NCOA2, HPS4, TMED3, CREBBP, YIF1A,…
HALLMARK_UV_RESPONSE_UP	0.413333	0.754321	0.121543	-0.243756	-1.0101	63	LHX2, DLG4, IGFBP2, FKBP4, MAPK8IP2, CNP, HSPA13, SLC25A4, STIP1, NPTXR, SQSTM1, EPHX1
Down_Syndrome_Fetus	0.421429	0.754321	0.0617054	0.237615	1.01822	198	PMP22, MYO1B, KCNK4, NCOA5, SYT4, INPP4B, KRT8, UBE3A, VAX1, RCAN2, TEAD4, GALNT14, ABCG5, CYGB, TMEM62, CTHRC1, ADHFE1, SP110, CDH6, RFX5, CP, CDH10, ANK3, CEP192, NEUROD1, EXOC2, SLC8A3, SLCO3A1, ZBTB8OS, RTN4RL1, CLDN4, ARPC1B, TH, UCP2, MSH2, BTBD9, PDE4B, RASA2, ZNF354A, USP8, SLC30A10, MAP3K1, ADAM19, SPEN, PRRC2B, LINGO3, MGAT3, LIMCH1, PIP4K2B, EGLN3
Intellectual_Disability	0.437008	0.754321	0.129443	-0.231007	-1.00472	81	KIRREL3, AHDC1, SYNGAP1, ACTG1, CEP135, ALDH3A2, PACS1, PTDSS1, CRADD, TECR, FOXP1, MEF2C, GRIN1, CTNNB1, TBC1D24, STXBP1, DYRK1A, TCF4, CEP152, MCPH1, ANKRD11
HALLMARK_APICAL_JUNCTION	0.439516	0.754321	0.130777	-0.225042	-0.998914	88	EXOC4, ACTG1, AKT3, CDH3, SPEG, BAIAP2, HRAS, MYL12B, AKT2, MDK, JUP, NLGN2, ATP1A3, CD34, GNAI2, CD276, PFN1, NRXN2, FSCN1, ACTN1, PBX2, STX4, CERCAM, VAV2, PKD1, LAMB3, SHC1, ICAM5, CLDN18, PLCG1, GAMT, RSU1, DHX16, INSIG1, EVL
HALLMARK_UV_RESPONSE_DN	0.44837	0.754321	0.0650878	0.267406	1.00127	73	PMP22, AMPH, PIK3R3, ADORA2B, INPP4B, CACNA1A, COL1A2, APBB2, KALRN, SIPA1L1, PTPRM, IGF1R, RASA2, SCN8A, FBLN5, TJP1, FYN, SLC7A1, DLC1, PRKCE, KCNMA1, ATXN1, TGFBR3, CDK13, ANXA2, LPAR1, RND3, COL11A1
HALLMARK_WNT_BETA_CATENIN_SIGNALING	0.459948	0.754321	0.0982123	-0.316939	-1.01224	21	KAT2A, NCOR2, CSNK1E, CUL1, CTNNB1, CCND2, NUMB
HALLMARK_ADIPOGENESIS	0.466488	0.754321	0.0625237	0.258003	0.9947	87	SPARCL1, MARC2, FZD4, ABCA1, ENPP2, MAP4K3, BCL6, PHYH, PQLC3, ITIH5, GBE1, UCP2, ACADM, CAT, PTGER3, APLP2, TANK, EPHX2
HALLMARK_PROTEIN_SECRETION	0.540845	0.815878	0.0937465	-0.286586	-0.941633	24	SOD1, BNIP3, TPD52, GNAS
HALLMARK_UNFOLDED_PROTEIN_RESPONSE	0.552553	0.815878	0.0962406	-0.257065	-0.939395	37	VEGFA, ATF4, ZBTB17, EXOSC2, CHAC1
HALLMARK_IL6_JAK_STAT3_SIGNALING	0.55493	0.815878	0.0922597	-0.294837	-0.952873	23	TNFRSF1A, CNTFR, STAT3, TYK2, IFNGR2
HALLMARK_TGF_BETA_SIGNALING	0.592068	0.815878	0.0888945	-0.278111	-0.921495	25	NCOR2, SKI, THBS1, IFNGR2, PPP1CA, CTNNB1
HALLMARK_PEROXISOME	0.59633	0.815878	0.0928481	-0.243709	-0.929294	44	DLG4, SOD1, HRAS, TSPO, ECH1, SLC25A4, HMGCL, ABCB9, PEX14, CTBP1, HSD17B4, FIS1, ERCC1, IDH2, ABCC8
HALLMARK_P53_PATHWAY	0.597744	0.815878	0.105125	-0.220806	-0.947405	73	PRMT2, APP, NDRG1, BAIAP2, HRAS, DDB2, FDXR, RAD9A, PLXNB2, EPHX1, IER3, MXD4, RXRA, SPHK1, CCND2, RPL36, RAD51C, ZNF365, CCND3, RNF19B
HALLMARK_SPERMATOGENESIS	0.60303	0.815878	0.0561767	0.286406	0.908421	30	CLGN, NOS1, MTOR, STRBP, PACRG, AURKA, PIAS2, OAZ3
HALLMARK_ALLOGRAFT_REJECTION	0.619186	0.815878	0.0530213	0.266737	0.908694	42	IGSF6, ST8SIA4, LYN, PTPRC, HLA-DMA, WARS, PSMB10, BRCA1, CD8B, CARTPT, IL7, EGFR, BCAT1, HDAC9, IL16, PRKCB
HALLMARK_HYPOXIA	0.624521	0.815878	0.103576	-0.210686	-0.928406	83	VEGFA, LDHA, NDRG1, RORA, BHLHE40, TPD52, PFKFB3, NR3C1, GPC1, GAPDH, HDLBP, P4HA2, IER3, CXCR4, PFKP, MAFF, BCL2, HK1, INHA, PLAUR, DPYSL4, CA12, CDKN1C, TGFB3, EFNA3
HALLMARK_KRAS_SIGNALING_DN	0.63467	0.815878	0.0512184	0.251633	0.892794	54	SIDT1, RYR1, TG, NOS1, PTPRJ, COL2A1, FGGY, P2RX6
HALLMARK_E2F_TARGETS	0.641026	0.815878	0.0913924	-0.231224	-0.915782	52	STMN1, SLBP, DCTPP1, POLD2, HMGA1, CCNB2, LIG1, RFC3, SMC4, DNMT1, RAD51C, POLE4, SPAG5, ILF3, MCM7
HALLMARK_IL2_STAT5_SIGNALING	0.644444	0.815878	0.0995791	-0.213946	-0.91754	72	NDRG1, MYO1E, RORA, BHLHE40, TIAM1, CYFIP1, AGER, GPX4, PLEC, P2RX4, ST3GAL4, ETV4, MYO1C, RNH1, MAFF, CCND2, BCL2, CCND3, CDKN1C, GLIPR2
Allen_Brain_Atlas_Developing_Human_Brain_Tissue_Gene_Expression_Profiles_by_RNAseq_Primary_Auditory_Cortex.Core	0.645833	0.815878	0.17822	-0.178743	-0.953216	357	NTNG2, NDUFV3, EML6, IL27RA, RABL6, LPL, MRPS6, ATF4, SYBU, BOC, CAMKV, CDH3, PPP1R13L, NCOR2, SLBP, CAPN1, SERINC5, TSPO, ZDHHC11, SLC2A4RG, AKT2, RHOBTB1, LARP4B, INHBA, RECQL5, SCNN1D, LZTS2, LRRN3, TRPC4, PACS1, FAM81A, CHAC1, KIF1C, KREMEN2, CRADD, THBS1, FOXP1, PIN1, MEF2C, MRPS2, ST6GAL2, SLC35C1, PAXBP1-AS1, SMTNL2, BTNL9, RTN1, VOPP1, DCBLD1, PREX1, DGKQ, CRYBB2P1, SERTAD2, GNAO1, CCDC18…
HALLMARK_G2M_CHECKPOINT	0.658046	0.815878	0.0496901	0.247131	0.88669	58	LBR, BIRC5, PRIM2, RASAL2, CDC6, ODF2, TLE3, SRSF10, AURKA, E2F1, PAFAH1B1, GINS2, KIF11, SLC7A5, SLC7A1, BUB3, ORC5
Allen_Brain_Atlas_Developing_Human_Brain_Tissue_Gene_Expression_Profiles_by_RNAseq_CTD.Gene_Disease.Associations_ID	0.665584	0.815878	0.0899861	-0.221597	-0.907065	57	SYNGAP1, RABL6, KDM6B, COL18A1, CACNA1G, GNAS, CAPN10, MEF2C
HALLMARK_ESTROGEN_RESPONSE_EARLY	0.679167	0.819312	0.103576	-0.204291	-0.913727	92	ABLIM1, SLC9A3R1, TUBB2B, FKBP4, SYBU, BHLHE40, NCOR2, TIAM1, SEMA3B, FLNB, RARA, CCND1, SLC37A1, BLVRB, AKAP1, CELSR1, ARL3, CXCL12, KDM4B, ADD3, BCL2
HALLMARK_GLYCOLYSIS	0.712598	0.846211	0.0972151	-0.20473	-0.890432	81	VEGFA, NDUFV3, LDHA, SOD1, FKBP4, STMN1, PKM, GPC1, HDLBP, P4HA2, B3GAT3, IER3, CXCR4, PFKP, B4GALT2, TSTA3, GALE, PLOD1, DPYSL4
HALLMARK_HEDGEHOG_SIGNALING	0.731458	0.855243	0.0721798	-0.26324	-0.812653	19	VEGFA, TLE1, CNTFR, RTN1, CELSR1
HALLMARK_BILE_ACID_METABOLISM	0.780236	0.898454	0.0431037	0.239893	0.808789	41	ACSL1, ABCA1, EFHC1, PHYH, RBP1, CAT, SLC23A1, EPHX2, PEX11G, LONP2, PIPOX, BCAR3, ABCG4, ATXN1, CYP46A1, LIPE, SLC23A2
Allen_Brain_Atlas_Developing_Human_Brain_Tissue_Gene_Expression_Profiles_by_RNAseq_amygdaloid_complex	0.794872	0.901646	0.0246382	0.194338	0.913263	897	HSPA12A, PCDH17, CNIH3, CLSTN2, AJAP1, LACC1, ASTN2, GRIK2, CNTN4, FBXW7, RAB4B, TCERG1L, MARC2, HS6ST3, SULF2, TMEM232, CHST3, TRIM9, F2RL1, KCNA1, HAPLN1, ARL4C, GRIN2B, B3GNT2, KCNK4, SLC7A7, LRP1B, TXNRD1, ECT2L, KCNB1, ZADH2, PET117, MATN1, GRM5, NCOA5, SLC35F3, VSTM2L, FHDC1, DHX40, SOSTDC1, MAGI3, MYADML2, ADAMTSL5, SPTB, VGLL3, COL12A1, IGSF9B, PRKD1, ST3GAL5, OXCT1, KCNQ5, SGPL1, BCL6, U…
HALLMARK_ANDROGEN_RESPONSE	0.837037	0.935512	0.0400846	0.227613	0.774189	44	INPP4B, KRT8, CAMKK2, SLC38A2, HERC3, ELL2, HMGCR, ARID5B, PMEPA1, SPCS3
HALLMARK_MTORC1_SIGNALING	0.868195	0.956273	0.036839	0.21095	0.753935	56	ACACA, TXNRD1, PIK3R3, FKBP2, WARS, GBE1, HMGCR, AURKA, CD9, SLC7A5, EGLN3, BCAT1, ELOVL5, UCHL5
Allen_Brain_Atlas_Developing_Human_Brain_Tissue_Gene_Expression_Profiles_by_RNAseq_Posterior.Caudal_Superior_Temporal_Cortex_Area.22c	0.884783	0.960621	0.0218679	0.186199	0.848798	465	ITPR2, TNXB, TNR, DKK1, DDR2, AGO2, HS6ST3, LSAMP, IGSF6, ADAP2, PEG3, KCNB1, PET117, MTUS1, NOS3, KY, CNKSR3, PREX2, SOSTDC1, INPP4B, GRP, ZCWPW2, IGSF9B, SHC3, SCAF11, FREM1, PITPNC1, PTPRJ, PPP2R1B, ACTL10, PCDHA7, RNF130, GREB1, ZNF621, NAALADL2, ADRA1A, NAALADL1, RGS16, CTHRC1, PCDHA11, PAPPA, PDE1C, SIK2, RFX5, ILDR2, VPS13D, ZNF426, MEGF11, IRAK4, NR2C2, ZNF469, CAMTA1, CAPS2, MED12L, PCDH…
Allen_Brain_Atlas_Developing_Human_Brain_Tissue_Gene_Expression_Profiles_by_RNAseq_Hippocampus_Hippocampal_Formation	0.897436	0.960636	0.24134	-0.164671	-0.912459	607	ADARB1, CSAD, FBRSL1, TNK2, RASSF7, HSF2BP, LAMA5, PCNT, ULK1, SSBP4, SEZ6L, RABL6, MRPS6, COL9A2, MIB2, GMEB2, CDCA7, DMPK, GNB3, PDIA2, NCOR2, SPEG, ETV1, TMEM120B, BAIAP2, SYN3, ASAH1, LY6H, ZBTB17, SLBP, CAPZB, ATIC, ALDH3A2, DYDC2, SETD1A, CDK10, SPIRE2, TMTC4, KLC4, ZDHHC11, SPTBN4, CYFIP1, CBX4, UVSSA, INHBA, RECQL5, SCNN1D, LZTS2, MED15, LRRN3, MAN2A2, JAK1, CAPN10, RBFOX3, SEMA3B, KIF1C,…
Abnormality_Of_Neuronal_Migration	0.958453	0.99511	0.0321428	0.18454	0.654747	54	GDF6, DYNC1H1, OCLN, ARFGEF2, POMGNT1, NDE1, PDGFB, CRB1, FKRP, PAFAH1B1, POMT2, RMND1, PEX10, FTO, ZNF423, LAMA2, COL4A1, GRIP1, KIF5C, KAT6B
HALLMARK_COMPLEMENT	0.969014	0.99511	0.0307753	0.184171	0.676297	67	LYN, F7, CP, DOCK10, PDGFB, DGKH, TNFAIP3, LIPA, USP8, HPCAL4, FYN, PRCP, DOCK4, PREP, SPOCK2, VCPIP1, DPP4, RASGRP1, PLAT, ZFPM2, MT3, CDH13, ME1, IRF2, F3, XPNPEP1, SRC, DOCK9
HALLMARK_PANCREAS_BETA_CELLS	0.97555	0.99511	0.0560596	-0.208389	-0.576922	13	AKT3, STXBP1
Allen_Brain_Atlas_Developing_Human_Brain_Tissue_Gene_Expression_Profiles_by_RNAseq_Inferolateral_Temporal_Cortex_Area.Tev_Area.20	0.991081	0.99511	0.0161937	0.163101	0.73122	339	ADAMTS14, AMPD3, MAPKAPK3, ABHD1, PEG3, KY, PREX2, TMCO4, SOSTDC1, SYT4, RUNX2, IGSF9B, SCAF11, NAV3, TSPAN9, RNF19A, PLXNC1, MYO16, PCDHA7, HLA-DMA, PPCDC, RGS16, FERMT3, AREL1, SP110, GPT, RINL, PCDHA11, RFX5, FGGY, MEGF11, ZNF469, PKP2, OXNAD1, PCDHA9, SLC8A3, PIK3AP1, PELO, BRCA1, COL16A1, ERMAP, ACADM, HMGCR, EFNB3, SARM1, PCDHAC2, E2F1, CACNA2D1, NOD1, TFB1M, TMEM102
HALLMARK_MYC_TARGETS_V2	0.99511	0.99511	0.0551352	-0.17809	-0.49304	13	DCTPP1, SLC19A1, TCOF1
